# Supplementary material
Source: publisher figshare collection journal article supplement (https://acs.figshare.com/ndownloader/files/9161224)

# Supporting Information for

## Phainanolide A, Highly Modified and Oxygenated Triterpenoid from *Phyllanthus hainanensis*

Yao-Yue Fan,<sup>†</sup> Li-She Gan,<sup>‡</sup> Hong-Chun Liu,<sup>†</sup> Heng Li,<sup>†</sup> Cheng-Hui Xu,<sup>†</sup> Jian-Ping Zuo,<sup>†</sup> Jian Ding,<sup>\*,†</sup> and Jian-Min Yue<sup>\*,†</sup>

<sup>†</sup>State Key Laboratory of Drug Research, Shanghai Institute of Materia Medica, Chinese Academy of Sciences, 555 Zu Chong Zhi Road, Zhangjiang Hi-Tech Park, Shanghai, 201203, People's Republic of China.

<sup>‡</sup>Institute of Modern Chinese Medicine, College of Pharmaceutical Sciences, Zhejiang University, Hangzhou, 310058, People's Republic of China.

### List of Supporting Information

|                                                                                                                                                                                                 |   |
|-------------------------------------------------------------------------------------------------------------------------------------------------------------------------------------------------|---|
| <b>Figure S1.</b> Key 2D NMR correlations for phainanoid G (2). .....                                                                                                                           | 1 |
| <b>Figure S2.</b> Key 2D NMR correlations for phainanoid H (3). .....                                                                                                                           | 2 |
| <b>Figure S3.</b> Key 2D NMR correlations for phainanoid I (4). .....                                                                                                                           | 3 |
| <b>Figure S4.</b> CD spectra of compounds 2–4. ....                                                                                                                                             | 4 |
| <b>Table S1.</b> <sup>1</sup> H NMR data (CDCl <sub>3</sub> , 400 MHz) for compounds 1–4. ....                                                                                                  | 5 |
| <b>Table S2.</b> <sup>13</sup> C NMR Data (CDCl <sub>3</sub> , 125 MHz) for compounds 1–4. ....                                                                                                 | 6 |
| <b>Table S3.</b> Linear correlation coefficients $R^2$ and root-mean-square deviation (RMSD) analyses of the calculated and experimental <sup>13</sup> C NMR data of four model compounds. .... | 7 |
| <b>Table S4.</b> DP4+ analysis result table. ....                                                                                                                                               | 7 |
| <b>Experimental Section</b> .....                                                                                                                                                               | 8 |
| <b>General Experimental Procedures.</b> .....                                                                                                                                                   | 8 |
| <b>Plant Material.</b> .....                                                                                                                                                                    | 8 |
| <b>Extraction and Isolation.</b> .....                                                                                                                                                          | 9 |
| <b>Physical constants and spectral data of 1–4</b> .....                                                                                                                                        | 9 |

|                                                                                                                           |    |
|---------------------------------------------------------------------------------------------------------------------------|----|
| <b>Bioassays</b> .....                                                                                                    | 10 |
| <b>NMR Calculation for Compound 1</b> .....                                                                               | 7  |
| <b>NMR data analogy of compound 1 with model compounds.</b> .....                                                         | 11 |
| <b>ECD Calculation for Compound 1</b> .....                                                                               | 12 |
| <b>Figure S7.</b> <sup>1</sup> H NMR spectrum of phainanolide A ( <b>1</b> ) in CDCl <sub>3</sub> .....                   | 16 |
| <b>Figure S8.</b> <sup>13</sup> C NMR spectrum of phainanolide A ( <b>1</b> ) in CDCl <sub>3</sub> .....                  | 17 |
| <b>Figure S9.</b> HSQC spectrum of phainanolide A ( <b>1</b> ) in CDCl <sub>3</sub> .....                                 | 18 |
| <b>Figure S10.</b> HMBC spectrum of phainanolide A ( <b>1</b> ) in CDCl <sub>3</sub> .....                                | 19 |
| <b>Figure S11.</b> <sup>1</sup> H– <sup>1</sup> H COSY spectrum of phainanolide A ( <b>1</b> ) in CDCl <sub>3</sub> ..... | 20 |
| <b>Figure S12.</b> NOESY spectrum of phainanolide A ( <b>1</b> ) in CDCl <sub>3</sub> .....                               | 21 |
| <b>Figure S13.</b> ESI(+)MS spectrum of phainanolide A ( <b>1</b> ).....                                                  | 22 |
| <b>Figure S14.</b> ESI(–)MS spectrum of phainanolide A ( <b>1</b> ).....                                                  | 23 |
| <b>Figure S15.</b> HRESI(–)MS spectrum of phainanolide A ( <b>1</b> ) .....                                               | 24 |
| <b>Figure S16.</b> IR spectrum of phainanolide A ( <b>1</b> ).....                                                        | 25 |
| <b>Figure S17.</b> <sup>1</sup> H NMR spectrum of phainanoid G ( <b>2</b> ) in CDCl <sub>3</sub> .....                    | 26 |
| <b>Figure S18.</b> <sup>13</sup> C NMR spectrum of phainanoid G ( <b>2</b> ) in CDCl <sub>3</sub> .....                   | 27 |
| <b>Figure S19.</b> HSQC spectrum of phainanoid G ( <b>2</b> ) in CDCl <sub>3</sub> .....                                  | 28 |
| <b>Figure S20.</b> HMBC spectrum of phainanoid G ( <b>2</b> ) in CDCl <sub>3</sub> .....                                  | 29 |
| <b>Figure S21.</b> <sup>1</sup> H– <sup>1</sup> H COSY spectrum of phainanoid G ( <b>2</b> ) in CDCl <sub>3</sub> .....   | 30 |
| <b>Figure S22.</b> ROESY spectrum of phainanoid G ( <b>2</b> ) in CDCl <sub>3</sub> .....                                 | 31 |
| <b>Figure S23.</b> ESI(+)MS spectrum of phainanoid G ( <b>2</b> ) .....                                                   | 32 |
| <b>Figure S24.</b> ESI(–)MS spectrum of phainanoid G ( <b>2</b> ).....                                                    | 33 |
| <b>Figure S25.</b> HRESI(–)MS spectrum of phainanoid G ( <b>2</b> ) .....                                                 | 34 |
| <b>Figure S26.</b> IR spectrum of phainanoid G ( <b>2</b> ).....                                                          | 35 |
| <b>Figure S27.</b> <sup>1</sup> H NMR spectrum of phainanoid H ( <b>3</b> ) in CDCl <sub>3</sub> .....                    | 36 |
| <b>Figure S29.</b> HSQC spectrum of phainanoid H ( <b>3</b> ) in CDCl <sub>3</sub> .....                                  | 38 |
| <b>Figure S30.</b> HMBC spectrum of phainanoid H ( <b>3</b> ) in CDCl <sub>3</sub> .....                                  | 39 |
| <b>Figure S31.</b> <sup>1</sup> H– <sup>1</sup> H COSY spectrum of phainanoid H ( <b>3</b> ) in CDCl <sub>3</sub> .....   | 40 |
| <b>Figure S32.</b> ROESY spectrum of phainanoid H ( <b>3</b> ) in CDCl <sub>3</sub> .....                                 | 41 |

|                                                                                                                         |    |
|-------------------------------------------------------------------------------------------------------------------------|----|
| <b>Figure S33.</b> ESI(+)MS spectrum of phainanoid H ( <b>3</b> ) .....                                                 | 42 |
| <b>Figure S34.</b> ESI(–)MS spectrum of phainanoid H ( <b>3</b> ).....                                                  | 43 |
| <b>Figure S35.</b> HRESI(+)MS spectrum of phainanoid H ( <b>3</b> ) .....                                               | 44 |
| <b>Figure S36.</b> IR spectrum of phainanoid H ( <b>3</b> ).....                                                        | 45 |
| <b>Figure S37.</b> <sup>1</sup> H NMR spectrum of phainanoid I ( <b>4</b> ) in CDCl <sub>3</sub> .....                  | 46 |
| <b>Figure S38.</b> <sup>13</sup> C NMR spectrum of phainanoid I ( <b>4</b> ) in CDCl <sub>3</sub> .....                 | 47 |
| <b>Figure S39.</b> HSQC spectrum of phainanoid I ( <b>4</b> ) in CDCl <sub>3</sub> .....                                | 48 |
| <b>Figure S40.</b> HMBC spectrum of phainanoid I ( <b>4</b> ) in CDCl <sub>3</sub> .....                                | 49 |
| <b>Figure S41.</b> <sup>1</sup> H– <sup>1</sup> H COSY spectrum of phainanoid I ( <b>4</b> ) in CDCl <sub>3</sub> ..... | 50 |
| <b>Figure S42.</b> ROESY spectrum of phainanoid I ( <b>4</b> ) in CDCl <sub>3</sub> .....                               | 51 |
| <b>Figure S43.</b> ESI(+)MS spectrum of phainanoid I ( <b>4</b> ).....                                                  | 52 |
| <b>Figure S44.</b> ESI(–)MS spectrum of phainanoid I ( <b>4</b> ).....                                                  | 53 |
| <b>Figure S45.</b> HRESI(–)MS spectrum of phainanoid I ( <b>4</b> ).....                                                | 54 |
| <b>Figure S46.</b> IR spectrum of phainanoid I ( <b>4</b> ) .....                                                       | 55 |

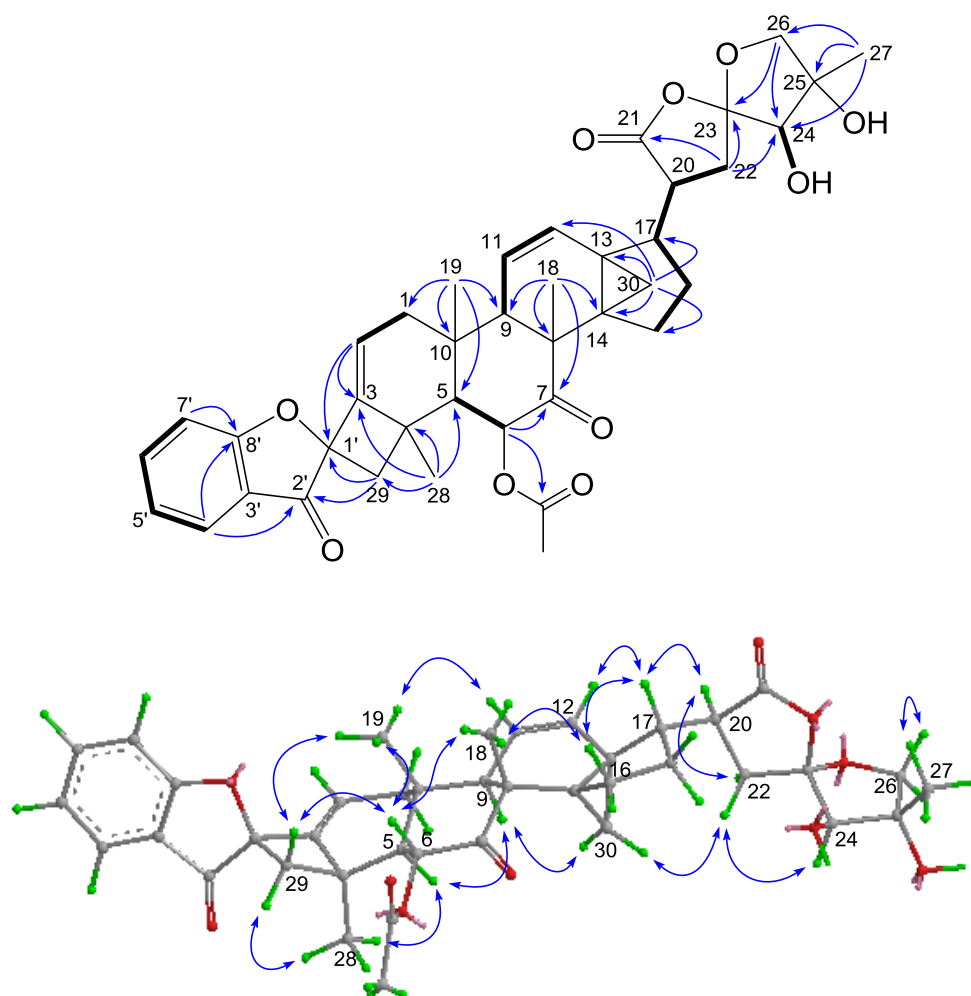

**Figure S1.** Key 2D NMR correlations for phainanoid G (**2**).

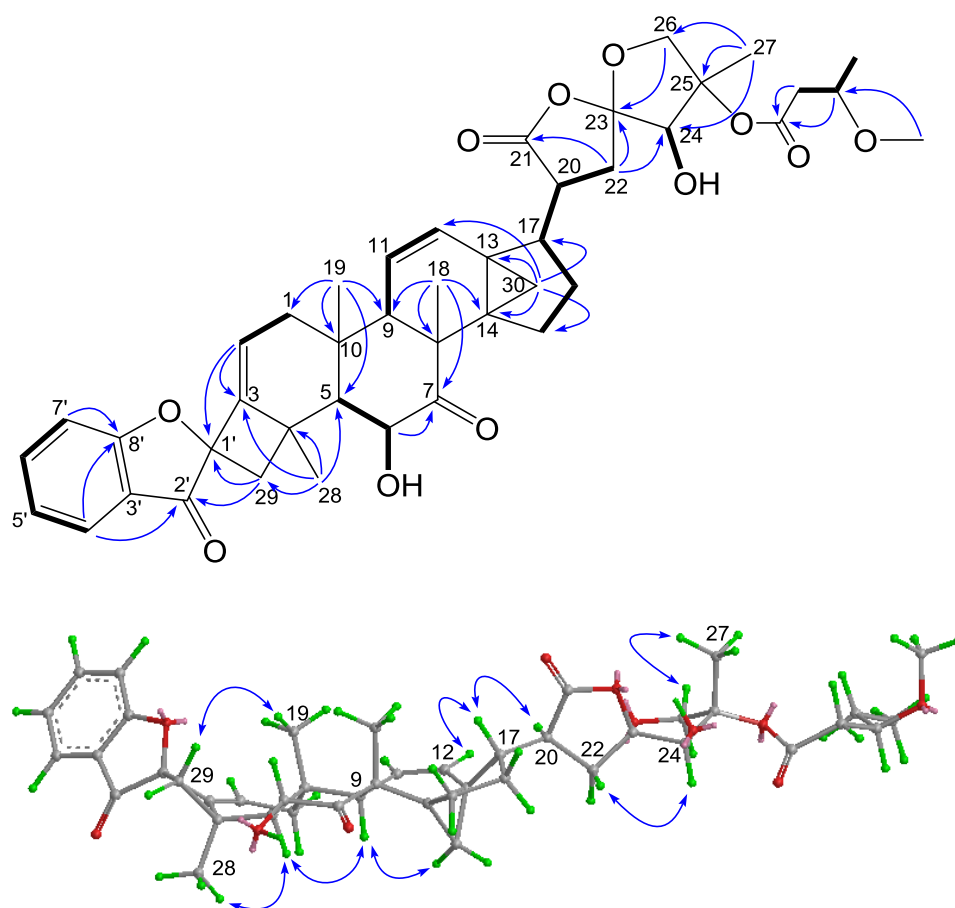

**Figure S2.** Key 2D NMR correlations for phainanoid H (**3**).

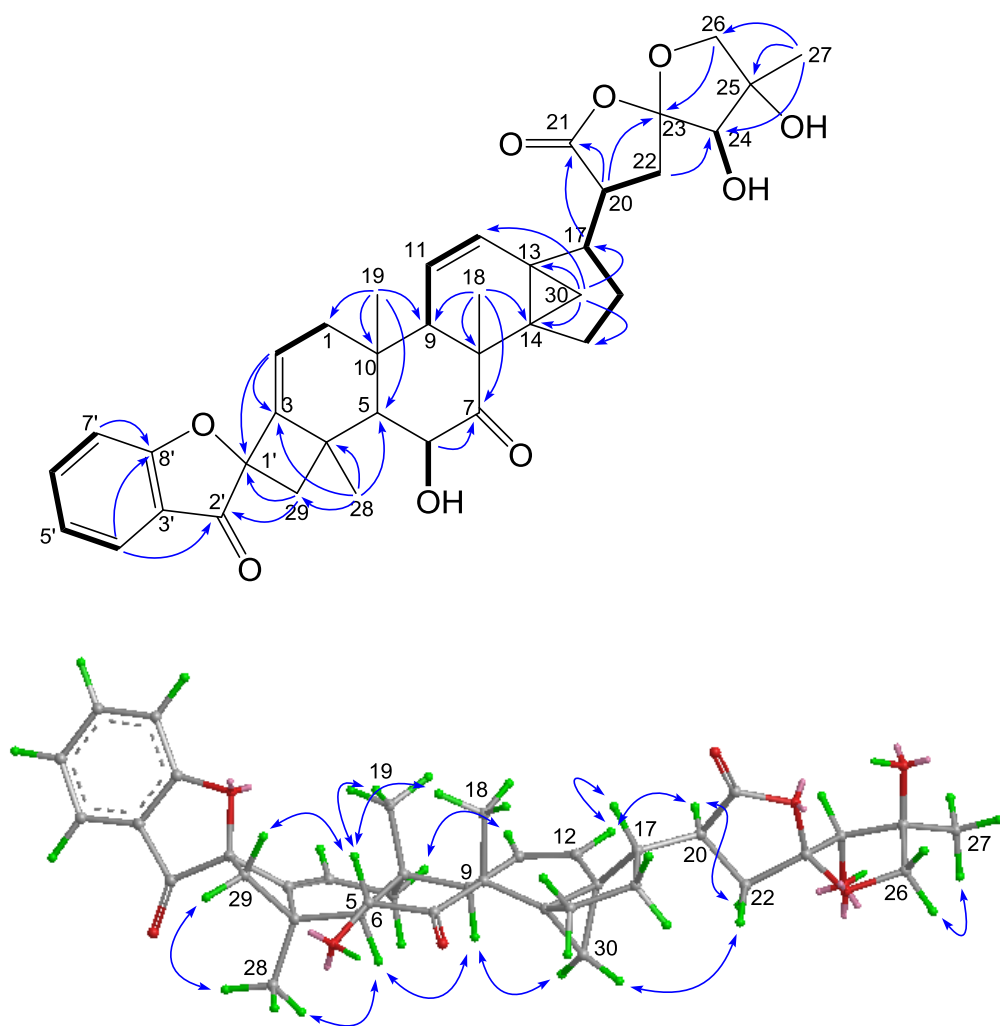

**Figure S3.** Key 2D NMR correlations for phainanoid I (4).

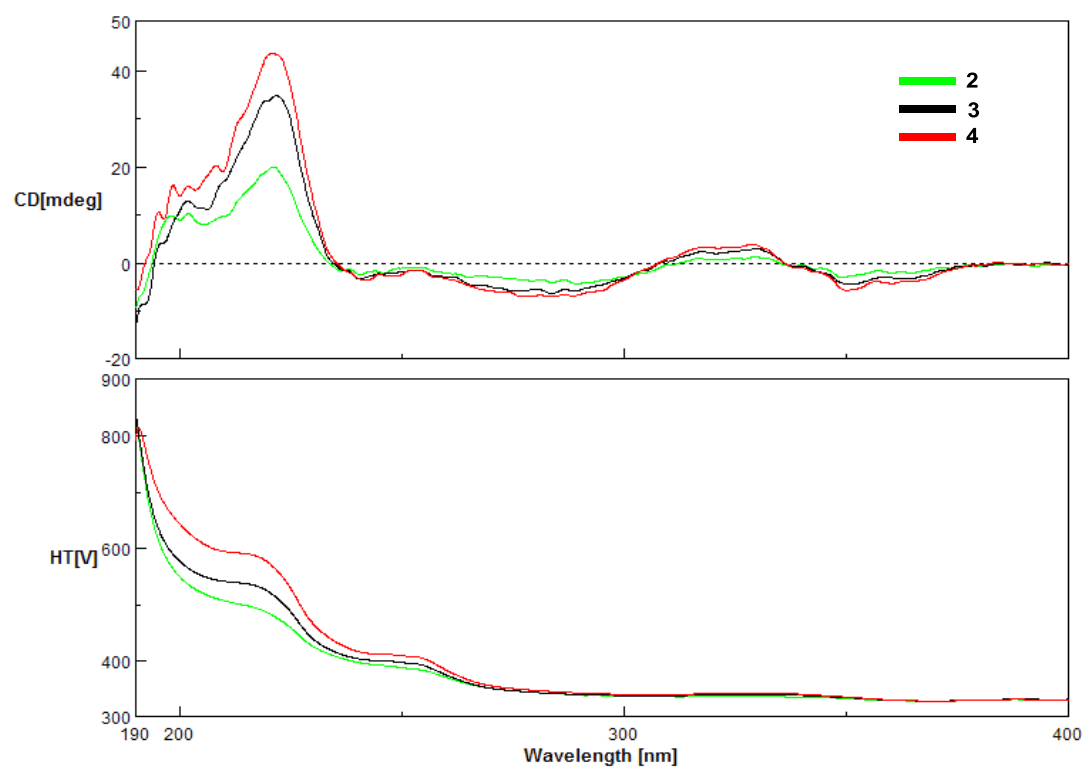

**Figure S4.** CD spectra of compounds 2–4.

**Table S1.** <sup>1</sup>H NMR data (CDCl<sub>3</sub>, 400 MHz) for compounds **1–4**.

| No          | 1                   | 2                        | 3                         | 4                        |
|-------------|---------------------|--------------------------|---------------------------|--------------------------|
| 1 $\alpha$  | 1.80 m              | 1.57 dd (14.7, 4.2)      | 1.51 dd (14.6, 4.2)       | 1.50 dd (14.6, 4.1)      |
| 1 $\beta$   | 2.46 m              | 2.33 dd (14.7, 8.5)      | 2.26 dd (14.6, 8.4)       | 2.25 dd (14.6, 8.5)      |
| 2           | 5.92 dd (7.9, 2.4)  | 5.77 dd (8.5, 4.2)       | 5.73 dd (8.4, 4.2)        | 5.72 dd (8.5, 4.1)       |
| 5           | 1.76 d (12.9)       | 1.90 d (13.9)            | 1.53 d (13.2)             | 1.54 d (13.4)            |
| 6           | 4.56 dd (12.9, 4.4) | 5.66 d (13.9)            | 4.67 dd (13.2, 5.0)       | 4.67 dd (13.4, 4.9)      |
| 9           | 2.04 brs            | 2.06 dd (2.9, 2.5)       | 2.03 dd (2.5, 2.8)        | 2.05 dd (2.9, 2.6)       |
| 11          | 5.43 dd (10.0, 2.4) | 5.42 dd (9.9, 2.5)       | 5.42 dd (10.0, 2.5)       | 5.40 dd (10.0, 2.6)      |
| 12          | 6.33 dd (10.0, 2.8) | 6.28 dd (9.9, 2.9)       | 6.27 dd (9.9, 2.8)        | 6.22 dd (10.0, 2.9)      |
| 15 $\beta$  | 1.99 m              | 2.01 m                   | 2.01 m                    | 2.00 m                   |
| 15 $\alpha$ | 2.20 m              | 2.18 m                   | 2.20 m                    | 2.20 m                   |
| 16 $\alpha$ | 1.35 m              | 1.13 m                   | 1.17 m                    | 1.24 m                   |
| 16 $\beta$  | 1.79 m              | 1.70 m                   | 1.73 m                    | 1.85 m                   |
| 17          | 2.60 m              | 2.53 m                   | 2.54 m                    | 2.54 m                   |
| 18          | 1.22 s              | 1.27 s                   | 1.21 s                    | 1.22 s                   |
| 19          | 1.16 s              | 1.32 s                   | 1.29 s                    | 1.29 s                   |
| 20          | 2.97 dd (9.8, 5.5)  | 3.28 td (10.1, 5.6)      | 3.22 ddd (10.1, 7.4, 5.6) | 2.87 ddd (9.8, 7.0, 6.1) |
| 22          | 4.37 dd (9.9, 9.8)  | 2.35 d (10.1, 2H)        | 2.29 m                    | 2.14 dd (14.0, 6.1)      |
| 22          |                     |                          | 2.39 m                    | 2.77 dd (14.0, 9.8)      |
| 24          | 4.42 d (5.4)        | 4.04 d (10.9)            | 4.16 d (5.0)              | 3.98 brs                 |
| 26 $\beta$  | 4.22 d (10.1)       | 3.93 d (9.6)             | 4.06 d (10.4)             | 4.00 d (9.6)             |
| 26 $\alpha$ | 4.32 d (10.1)       | 3.96 d (9.6)             | 4.27 d (10.4)             | 4.07 d (9.6)             |
| 27          | 1.61 s              | 1.43 s                   | 1.56 s                    | 1.41 s                   |
| 28          | 1.40 s              | 1.78 s                   | 1.77 s                    | 1.77 s                   |
| 29 $\beta$  | 4.18 d (9.9)        | 2.29 d (11.6)            | 2.52 d (11.6)             | 2.52 d (11.5)            |
| 29 $\alpha$ | 4.83 d (9.9)        | 2.49 d (11.6)            | 2.68 d (11.6)             | 2.68 d (11.5)            |
| 30a         | 1.05 d (6.5)        | 0.85 d (6.4)             | 0.89 d (6.3)              | 0.96 d (6.4)             |
| 30b         | 1.30 d (6.5)        | 1.29 d (6.4)             | 1.31 d (6.3)              | 1.40 d (6.4)             |
| 4'          | 7.52 d (7.0)        | 7.66 dd (8.1, 1.4)       | 7.67 dd (7.8, 1.4)        | 7.67 brd (7.7)           |
| 5'          | 7.20 m              | 7.09 brdd (8.1, 7.3)     | 7.08 brdd (7.8, 7.3)      | 7.08 brdd (7.7, 7.2)     |
| 6'          | 7.26 m              | 7.62 ddd (8.3, 7.3, 1.4) | 7.61 ddd (8.3, 7.3, 1.4)  | 7.61 ddd (8.4, 7.2, 1.3) |
| 7'          | 7.38 d (8.1)        | 7.08 brd (8.3)           | 7.08 brd (8.3)            | 7.08 brd (8.4)           |
| 10'         | 2.49 m (2H)         |                          |                           |                          |
| 11'         | 4.21 m              |                          |                           |                          |
| 12'         | 1.26 d (6.3)        |                          |                           |                          |
| 6-OH        | 3.89 d (4.4)        |                          | 3.51 d (5.0)              | 3.51 d (4.9)             |
| 22-OH       | 2.36 d (9.9)        |                          |                           |                          |
| 24-OH       | 3.31 d (5.4)        | 2.04 d (10.9)            | 3.33 d (5.0)              | 2.43 brs                 |
| 25-OH       |                     | 1.85 brs                 |                           | 2.97 brs                 |
| OAc         |                     | 2.18 s                   |                           |                          |
| 2''         |                     |                          | 2.41 m                    |                          |
|             |                     |                          | 2.54 m                    |                          |
| 3''         |                     |                          | 3.75 m                    |                          |
| 4''         |                     |                          | 1.21 d (7.7)              |                          |
| 3''-OMe     |                     |                          | 3.33 s                    |                          |



**Table S2.**  $^{13}\text{C}$  NMR Data ( $\text{CDCl}_3$ , 125 MHz) for compounds **1–4**.

| Position             | 1     | 2             | 3     | 4     |
|----------------------|-------|---------------|-------|-------|
| 1                    | 40.5  | 37.6          | 37.7  | 37.7  |
| 2                    | 112.9 | 120.3         | 119.9 | 119.9 |
| 3                    | 132.8 | 145.6         | 146.2 | 146.2 |
| 4                    | 37.1  | 42.8          | 43.4  | 43.4  |
| 5                    | 60.4  | 58.0          | 61.7  | 61.7  |
| 6                    | 70.9  | 73.7          | 71.7  | 71.7  |
| 7                    | 213.3 | 206.0         | 213.4 | 213.4 |
| 8                    | 47.2  | 48.4          | 47.5  | 47.5  |
| 9                    | 51.6  | 50.8          | 51.3  | 51.2  |
| 10                   | 37.3  | 42.7          | 42.2  | 42.2  |
| 11                   | 120.3 | 120.3         | 120.5 | 120.3 |
| 12                   | 131.8 | 131.7         | 131.5 | 131.9 |
| 13                   | 31.7  | 32.35         | 32.3  | 32.6  |
| 14                   | 36.6  | 36.9          | 36.6  | 37.5  |
| 15                   | 26.8  | 27.2          | 27.0  | 26.8  |
| 16                   | 23.8  | 23.8          | 23.8  | 26.3  |
| 17                   | 40.7  | 41.4          | 41.6  | 43.0  |
| 18                   | 17.3  | 17.2          | 17.4  | 17.4  |
| 19                   | 16.4  | 15.2          | 15.3  | 15.3  |
| 20                   | 47.0  | 40.9          | 40.7  | 42.4  |
| 21                   | 173.5 | 177.1         | 177.1 | 176.4 |
| 22                   | 69.6  | 32.4          | 31.3  | 30.9  |
| 23                   | 108.8 | 111.8         | 111.2 | 116.1 |
| 24                   | 76.9  | 83.2          | 80.4  | 82.1  |
| 25                   | 86.6  | 77.4          | 86.5  | 79.4  |
| 26                   | 78.0  | 78.6          | 77.9  | 80.2  |
| 27                   | 18.6  | 21.7          | 18.8  | 18.9  |
| 28                   | 28.1  | 28.0          | 28.4  | 28.4  |
| 29                   | 72.7  | 39.9          | 40.2  | 40.2  |
| 30                   | 14.5  | 14.3          | 14.1  | 14.2  |
| 1'                   | 137.1 | 92.6          | 93.0  | 93.0  |
| 2'                   | 136.7 | 198.5         | 198.5 | 198.6 |
| 3'                   | 121.4 | 120.7         | 120.9 | 120.9 |
| 4'                   | 118.3 | 125.0         | 125.0 | 125.0 |
| 5'                   | 122.7 | 122.2         | 122.1 | 122.1 |
| 6'                   | 124.9 | 138.2         | 138.0 | 138.0 |
| 7'                   | 111.6 | 113.0         | 112.9 | 112.9 |
| 8'                   | 153.3 | 170.8         | 170.8 | 170.8 |
| 9'                   | 173.7 |               |       |       |
| 10'                  | 43.4  |               |       |       |
| 11'                  | 64.5  |               |       |       |
| 12'                  | 22.8  |               |       |       |
| 6-OAc                |       | 20.9<br>170.2 |       |       |
| 1''                  |       |               | 172.8 |       |
| 2''                  |       |               | 42.4  |       |
| 3''                  |       |               | 73.8  |       |
| 4''                  |       |               | 19.2  |       |
| 3''-OCH <sub>3</sub> |       |               | 56.6  |       |

**Table S3.** Linear correlation coefficients  $R^2$  and root-mean-square deviation (RMSD) analyses of the calculated and experimental  $^{13}\text{C}$  NMR data of four model compounds.

| Isomers | <b>1a</b> | <b>1b</b> | <b>1c</b> | <b>1d</b> |
|---------|-----------|-----------|-----------|-----------|
| $R^2$   | 0.98112   | 0.97734   | 0.97875   | 0.97143   |
| RMSD    | 10.41222  | 11.66796  | 10.52129  | 12.90987  |

**Table S4.** DP4+ analysis result table (Isomer 1 for **1a**, Isomer 2 for **1b**, Isomer 3 for **1c**, Isomer 4 for **1d**).

| Functional |      | Solvent?     |           | Basis Set   |            | Type of Data    |          |
|------------|------|--------------|-----------|-------------|------------|-----------------|----------|
| mPW1PW91   |      | Gas Phase    |           | 6-31+G(d,p) |            | Unscaled Shifts |          |
|            |      | DP4+         | 95.89%    | 0.00%       | 4.11%      | 0.00%           | —        |
| Nuclei     | sp2? | experimental | Isomer 1  | Isomer 2    | Isomer 3   | Isomer 4        | Isomer 5 |
| C          | x    | 137.1        | 145.85315 | 143.00475   | 135.219711 | 136.79955       |          |
| C          | x    | 136.7        | 142.97335 | 151.35535   | 152.19886  | 153.98665       |          |
| C          | x    | 121.4        | 137.02025 | 136.75235   | 128.157317 | 135.05145       |          |
| C          | x    | 118.3        | 136.31975 | 138.04365   | 136.656548 | 136.47675       |          |
| C          | x    | 122.7        | 131.36905 | 130.34115   | 126.760747 | 129.69465       |          |
| C          | x    | 124.9        | 134.25685 | 135.82715   | 135.84314  | 137.67695       |          |
| C          | x    | 111.6        | 128.27185 | 125.64275   | 127.024457 | 128.57555       |          |
| C          | x    | 153.3        | 155.93065 | 158.82685   | 164.067745 | 166.13705       |          |
| C          | x    | 173.7        | 174.96765 | 176.91045   | 177.580143 | 178.52735       |          |
| C          |      | 43.4         | 46.92565  | 43.67835    | 46.3308929 | 43.70025        |          |
| C          |      | 64.5         | 76.89055  | 83.00425    | 78.1777046 | 86.65625        |          |
| C          |      | 22.8         | 23.87665  | 23.26725    | 23.8819922 | 25.00775        |          |

## Experimental Section

**General Experimental Procedures.** NMR spectra were recorded on a Bruker Avance III 500 spectrometer (Bruker Biospin Rheinstetten, Germany) with TMS as internal standard. ESIMS was measured on a Bruker Daltonics esquire 3000 plus instrument (Bruker Biospin Rheinstetten, Germany). HRESIMS was measured with a LCT Premier XE (Waters) mass spectrometer (Waters, Milford, MA, U.S.). Optical rotations were obtained on a Perkin-Elmer 341 polarimeter (Wellesley, MA, USA) at set temperature. CD spectra were obtained on a JASCO J-810 spectrometer (Shimadzu, Kyoto, Japan). UV spectra were measured on a Shimadzu UV-2550 UV-visible spectrophotometer (Shimadzu, Kyoto, Japan). IR spectra were recorded on a Perkin-Elmer 577 IR spectrometer (Wellesley, MA, USA) with KBr disks. Column chromatography was performed on silica gel (300–400 mesh). MCI gel (CHP20P, 75–150  $\mu\text{m}$ , Mitsubishi Chemical Industries, Ltd.),  $\text{C}_{18}$  reversed-phase silica gel (150–200 mesh, Merck), and Sephadex LH-20 (Amersham Biosciences) were used for reverse phase column chromatography, and precoated silica gel GF254 plates (Qingdao Marine Chemical Plant, Qingdao, China) were used for thin-layer chromatography (TLC). Semi-preparative HPLC was performed on a Waters 1525 pump with a Waters 2489 detector (254 nm and 210 nm) and an YMC-Pack ODS-A column (250  $\times$  10 mm, S-5  $\mu\text{m}$ , 12 nm). All solvents were of analytical grade (Shanghai Chemical Reagents Co. Ltd., China), and solvents used for HPLC were of HPLC grade (J&K Scientific Ltd., China).

**Plant Material.** The entire plants of *Phyllanthus hainanensis* Merr. were collected from Hainan island, P. R. China, and were authenticated by Prof. S-M Huang, Department of Biology, Hainan University, P. R. China. A voucher specimen has been deposited in the herbarium of Shanghai Institute of Materia Medica, Chinese Academy of Sciences (accession number: Ph-2010Hn-1Y).

**Extraction and Isolation.** The air-dried powder of the plant material (5 kg) was percolated three times with 95% EtOH (10 L) at RT, to give 300 g of crude extract which was suspended in water (0.5 L) and partitioned successively with EtOAc (3 × 0.5 L) and *n*-BuOH (3 × 0.5 L). The EtOAc-soluble part (103 g) was fractionated by a MCI gel column eluted with MeOH/H<sub>2</sub>O (30–100%) to give four fractions F1–F4. Fraction F2 (3 g) was extensively chromatographed over silica gel, RP-18 silica gel, and Sephadex LH-20 gel to afford mixtures of the major components, which were further purified by semi-preparative HPLC to yield compounds **1** (3.1 mg), **2** (2.2 mg), **3** (3.0 mg), and **4** (4.7 mg).

#### Physical constants and spectral data of 1–4

**Phainanolide A (1):** White amorphous solid;  $[\alpha]_D^{25} = +41.7$  ( $c = 0.10$  in CHCl<sub>3</sub>); <sup>1</sup>H and <sup>13</sup>C NMR data, see Tables S1 and S2; IR (KBr):  $\nu_{\max} = 3399\text{ cm}^{-1}$  (O-H), 1731, 1714  $\text{cm}^{-1}$  (C=O); UV/Vis (EtOH):  $\lambda_{\max} (\log \epsilon) = 308 (3.51), 295 (3.25), 251 (3.11), 242 (3.22) \text{ nm}$ ; CD (EtOH):  $\lambda (\Delta\epsilon) = 211 (-3.70), 251 (2.67), 306 (2.81), 321 (2.45), \text{ nm}$ ; LRESI( $\pm$ )MS:  $m/z$  745.4 [M + H]<sup>+</sup>, 790.2 [M + HCO<sub>2</sub>]<sup>−</sup>; HRESI(−)MS:  $m/z$  789.3119 [M + HCO<sub>2</sub>]<sup>−</sup> (calcd for C<sub>43</sub>H<sub>49</sub>O<sub>14</sub>, 789.3122).

**Phainanoid G (2):** White amorphous solid;  $[\alpha]_D^{25} = +3.3$  ( $c = 0.06$  in CHCl<sub>3</sub>); <sup>1</sup>H and <sup>13</sup>C NMR data, see Tables S1 and S2; IR (KBr):  $\nu_{\max} = 3491\text{ cm}^{-1}$  (O-H), 1747, 1721  $\text{cm}^{-1}$  (C=O); UV/Vis (EtOH):  $\lambda_{\max} (\log \epsilon) = 215.0 (4.03), 253.2 (3.51) \text{ nm}$ ; CD (EtOH):  $\lambda (\Delta\epsilon) = 221 (10.96), 241 (-1.12), 290 (-2.31), 330 (0.68), 350 (-1.52) \text{ nm}$ ; LRESI( $\pm$ )MS:  $m/z$  685.4 [M + H]<sup>+</sup>, 729.5 [M + HCO<sub>2</sub>]<sup>−</sup>; HRESI(−)MS:  $m/z$  729.2922 [M + HCO<sub>2</sub>]<sup>−</sup> (calcd for C<sub>41</sub>H<sub>45</sub>O<sub>12</sub>, 729.2911).

**Phainanoid H (3):** White amorphous solid;  $[\alpha]_D^{25} = +19.1$  ( $c = 0.08$  in CHCl<sub>3</sub>); <sup>1</sup>H and <sup>13</sup>C NMR data, see Tables S1 and S2; IR (KBr):  $\nu_{\max} = 3425\text{ cm}^{-1}$  (O-H), 1783, 1712  $\text{cm}^{-1}$  (C=O); UV/Vis (EtOH):  $\lambda_{\max} (\log \epsilon) = 219 (4.29), 253 (3.80) \text{ nm}$ ; CD (EtOH):  $\lambda (\Delta\epsilon) = 222 (24.67), 241 (-2.19), 284 (-4.38), 330 (2.13), 351 (-3.09) \text{ nm}$ ; LRESI( $\pm$ )MS:  $m/z$  743.4 [M + H]<sup>+</sup>, 787.9 [M + HCO<sub>2</sub>]<sup>−</sup>; HRESI(+ )MS:  $m/z$  765.3237 [M + Na]<sup>+</sup> (calcd for C<sub>43</sub>H<sub>50</sub>O<sub>11</sub>Na, 765.3245).

**Phainanoid I (4):** White amorphous solid;  $[\alpha]_D^{25} = -10.3$  ( $c = 0.09$  in  $\text{CHCl}_3$ );  $^1\text{H}$  and  $^{13}\text{C}$  NMR data, see Tables S1 and S2; IR (KBr):  $\nu_{\text{max}} = 3438\text{ cm}^{-1}$  (O-H), 1765, 1712  $\text{cm}^{-1}$  (C=O); UV/Vis (EtOH):  $\lambda_{\text{max}}$  ( $\log \varepsilon$ ) = 218 (4.08), 254 (3.58) nm; CD (EtOH):  $\lambda$  ( $\Delta\varepsilon$ ) = 222 (25.36), 241 (−2.09), 284 (−4.38), 330 (2.71), 351 (−3.40) nm; LRESI( $\pm$ )MS:  $m/z$  643.3  $[\text{M} + \text{H}]^+$ , 687.8  $[\text{M} + \text{HCO}_2]^-$ ; HRESI(−)MS:  $m/z$  687.2826  $[\text{M} + \text{HCO}_2]^-$  (calcd for  $\text{C}_{39}\text{H}_{43}\text{O}_{11}$ , 687.2805).

## Bioassays

### Cytotoxicity

The *in vitro* cytotoxicities of all isolated compounds against HL-60 cell line were measured by using the MTT method. Briefly, test cells in culture medium 100  $\mu\text{L}$  were seeded in each well of 96-well plates (Falcon, CA). Cells were treated in triplicate with 10  $\mu\text{L}$  of grade concentrations of the compounds at 37  $^\circ\text{C}$ . After 72 h, a 20  $\mu\text{L}$  aliquot of MTT solution (5 mg/mL) was added to the wells. The cultures were incubated for another 4 h, and then 100  $\mu\text{L}$  of “triplex solution” (10% SDS/5% isobutanol/10 mM HCl) was added. The plates were incubated at 37  $^\circ\text{C}$  in 5%  $\text{CO}_2$  overnight. The OD values were measured at 570 nm by a plate reader (VERSA Max, Molecular Devices, Sunnyvale, CA). Average values determined from triplicate readings were used for the inhibitory rate calculation by the formula:  $(\text{OD}_{\text{control well}} - \text{OD}_{\text{treated well}})/(\text{OD}_{\text{control well}} - \text{OD}_{\text{blank well}}) \times 100\%$ . The  $\text{IC}_{50}$  was calculated using Logistic regression from three independent tests. Adriamycin was used as the positive control.

The *in vitro* cytotoxicities of all isolated compounds against A549 cells were evaluated by using the SRB assay. Briefly, test cells were seeded into 96-well plates (Falcon, CA) and allowed to attach overnight. The cells were treated in triplicate with 10  $\mu\text{L}$  of grade concentrations of the compounds at 37  $^\circ\text{C}$  for 72 h and were then fixed with 10% trichloroacetic acid and incubated at 4  $^\circ\text{C}$  for 1 h. The culture plates were washed and dried, and then SRB solution (0.4 wt %/vol in 1% acetic acid) was added and incubated for 15 min. The culture plates were washed and dried again, the bound cell stains were solubilized with Tris buffer. The OD values were measured at 560 nm

using a multi-well spectrophotometer (VERSA Max, Molecular Devices, Sunnyvale, CA). Average values determined from triplicate readings were used for the inhibitory rate calculation by the formula:  $(OD_{\text{control well}} - OD_{\text{treated well}}) / (OD_{\text{control well}} - OD_{\text{blank well}}) \times 100\%$ . The  $IC_{50}$  was calculated using Logistic regression from three independent tests. Adriamycin was used as the positive control.

### **Immunosuppressive activity**

**Reagents:** Concanavalin A (Con A), lipopolysaccharide (LPS, *Escherichia coli* 055:B5), CCK-8: WST-8 [2-(2-methoxy-4-nitrophenyl)-3-(4-nitrophenyl)-5-(2,4-disulfophenyl)-2H-tetrazolium, monosodium salt], and RPMI 1640 medium were purchased from GibcoBRL, Life Technologies (USA). Fetal bovine serum (FBS) was purchased from HyClone Laboratories (Utah, USA). [ $^3\text{H}$ ]-Thymidine (10  $\mu\text{Ci/mL}$ ) was obtained from the Shanghai Institute of Atomic Energy (SIAE).

**Animals:** Female BALB/C mice (7–9 weeks old) were obtained from Shanghai Experimental Animal Center and were housed in specific conditions (12 h light/12 h dark photoperiod,  $22 \pm 1$  °C,  $55\% \pm 5\%$  relative humidity). All husbandry and experimental contact were made with the mice maintained specific pathogen-free conditions. All experiments were carried out according to the NIH Guidelines for Care and Use of Laboratory Animals and approved by the Bioethics Committee of Shanghai Institute of Materia Medica.

**Preparation of spleen cells from mice:** Female BALB/C mice were sacrificed by cervical dislocation, and the spleens were removed aseptically. Mononuclear cell suspensions were prepared after cell debris, and clumps were removed. Erythrocytes were depleted with ammonium chloride buffer solution. Lymphocytes were washed and resuspended in RPMI 1640 medium supplemented with 10% FBS, penicillin (100 U/mL), and streptomycin (100 mg/mL).

**Cytotoxicity assay:** Cytotoxicity was assessed with CCK-8 assay. Briefly, fresh spleen cells were obtained from female BALB/C mice (7–9 weeks old). Spleen cells ( $1 \times 10^6$  cells) were cultured at 37 °C for 48 h in 96-well flat plates, in the presence or absence of various concentrations of compounds, in a humidified and 5%

CO<sub>2</sub>-containing incubator. A certain amount of CCK-8 was added to each well at the final 8–10 h of culture. To the end of the culture, we measured the OD values with microplate reader (Bio-Rad 650) at 450 nm. The cytotoxicity of each compound was expressed as the concentration of compound that reduced cell viability to 50% (CC<sub>50</sub>).

**T cell and B cell function assay:** Fresh spleen cells were obtained from female BALB/C mice (7–9 weeks old). The  $5 \times 10^5$  spleen cells were cultured at the same conditions as those mentioned above. The cultures, in the presence or absence of various concentrations of compounds, were stimulated with 5 µg/mL of ConA or 10 µg/mL of LPS to induce T cells or B cells proliferative responses, respectively. Proliferation was assessed in terms of uptake of [<sup>3</sup>H]-thymidine during 8 h of pulsing with 25 µL/well of [<sup>3</sup>H]-thymidine (10 µCi/mL), and then cells will be harvested onto glass fiber filters. The incorporated radioactivity was counted using a Beta scintillation counter (MicroBeta Trilux, PerkinElmer Life Sciences). The immunosuppressive activity of each compound was expressed as the concentration of compound that inhibited ConA-induced T cells proliferation or LPS-induced B cells proliferation to 50% (IC<sub>50</sub>) of the control value.

**NMR Calculation for Compound 1.** In order to determine the specific structure and relative configuration of the lactone ring, four model compounds possessing all four possibilities of the lactone ring and without the triterpenoid side chain were designed (Figure 2). These model compounds were conformational analyzed via Monte Carlo searching using molecular mechanism with MMFF94 force field in the Spartan 08 program.<sup>1</sup> The result showed only one conformer for each of **1a**, **1b**, and **1d** and three conformers for **1c** whose relative energies within 2 Kcal/mol (Figure S5). These conformers were reoptimized using DFT at the B3LYP/6-31+G(d,p) level in vacuum using the Gaussian 09 program.<sup>2</sup> The B3LYP/6-31+G(d,p) harmonic vibrational frequencies were further calculated to confirm their stability. Gauge-Independent Atomic Orbital (GIAO) calculations of their <sup>13</sup>C-NMR chemical shifts were accomplished by density functional theory (DFT) at the rmpw1pw91/6-31+g(d,p) level. The calculated NMR data of the three lowest energy conformers of **1c** were averaged according to the Boltzmann distribution theory and their relative Gibbs free energy ( $\Delta G$ ). The <sup>13</sup>C-NMR chemical shifts for TMS were calculated by the same procedure and used as the reference.

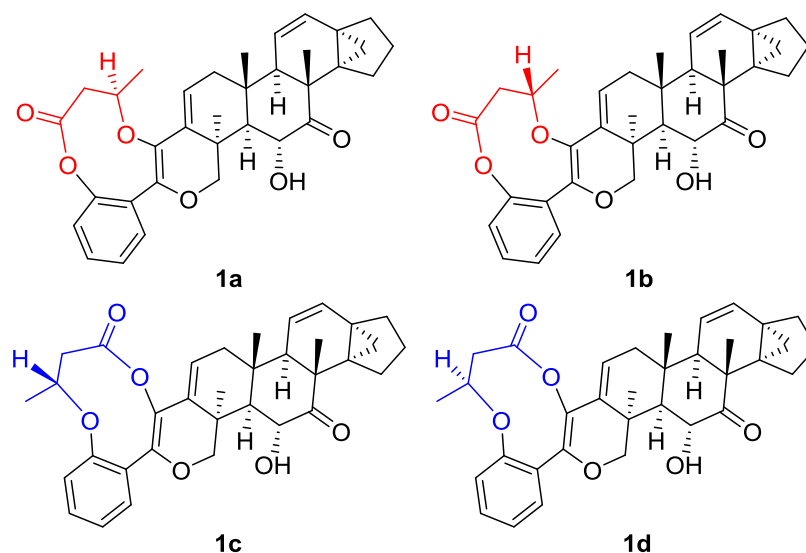

**Figure 2.** Four model compounds designed for the quantum chemical NMR calculation of compound **1**.



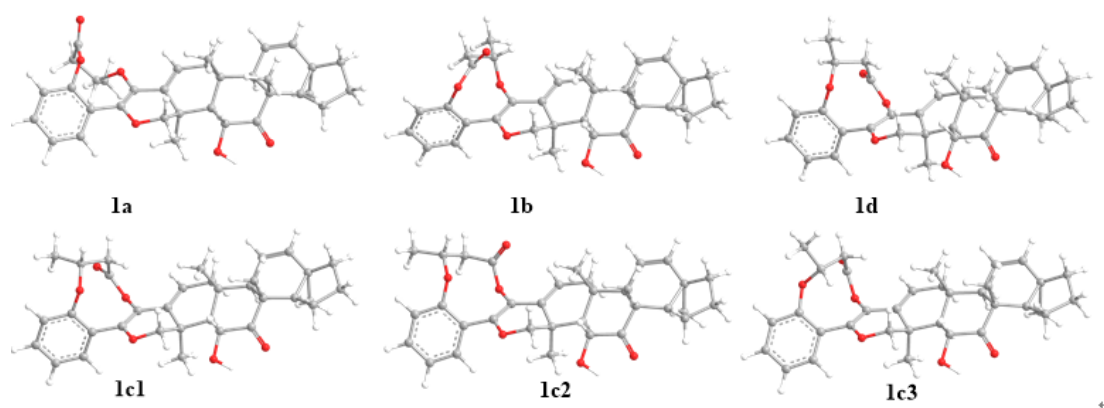

**Figure S5.** B3LYP/6-31+G(d,p) optimized lowest energy 3D conformers.

After calculation, chemical shifts of the lactone ring related carbons (C-1' – C-12') were selected for comparing with the experimental data. Linear correlation coefficients ( $R^2$ ), root-mean-square deviation (RMSD), and the DP4+ method<sup>3</sup> were adopted for evaluation of the results. The calculated data for **1a** showed the highest  $R^2$  and lowest RMSD values among the calculated isomers (Table S3). A significant higher DP4+ probability score (95.89%) (Table S4) again suggested **1a** as the correct structure.

#### Energy analysis:

| conf.      | MMFF energy              |                            | b3lyp/6-311++g(2d,2p) Gibbs free energy (298.15 K) |                          |                           |
|------------|--------------------------|----------------------------|----------------------------------------------------|--------------------------|---------------------------|
|            | $\Delta E$<br>(Kcal/mol) | Boltzmann.<br>Distribution | G (Hartree)                                        | $\Delta G$<br>(Kcal/mol) | Boltzmann<br>Distribution |
| <b>1c1</b> | 0.00                     | 0.522                      | -1769.255699                                       | 1.332                    | 0.095                     |
| <b>1c2</b> | 0.27                     | 0.332                      | -1769.252701                                       | 3.213                    | 0.004                     |
| <b>1c3</b> | 0.75                     | 0.146                      | -1769.257822                                       | 0                        | 0.901                     |

#### Calculated NMR data:

**Table S5.** Calculated  $^{13}\text{C}$  NMR chemical shifts.

| No | Exp. data | <b>1a</b> | <b>1b</b> | <b>1c</b> | <b>1d</b> |
|----|-----------|-----------|-----------|-----------|-----------|
| 1  | 40.5      | 43.78975  | 43.91585  | 43.87014  | 43.77405  |
| 2  | 112.9     | 123.739   | 120.0517  | 121.1693  | 120.1396  |
| 3  | 132.8     | 146.9633  | 145.6744  | 146.2398  | 145.3897  |
| 4  | 37.1      | 42.06205  | 43.14135  | 42.37094  | 42.45825  |

|     |       |          |          |          |          |
|-----|-------|----------|----------|----------|----------|
| 5   | 60.4  | 63.16275 | 63.61635 | 63.45904 | 63.88175 |
| 6   | 70.9  | 75.62455 | 75.97015 | 75.87241 | 75.63345 |
| 7   | 213.3 | 226.1925 | 226.7233 | 226.2957 | 225.8637 |
| 8   | 47.2  | 53.60175 | 53.58965 | 53.50474 | 53.88055 |
| 9   | 51.6  | 55.24935 | 56.34505 | 56.34722 | 55.93725 |
| 10  | 37.3  | 43.86295 | 41.57075 | 41.89943 | 42.54515 |
| 11  | 120.3 | 126.9416 | 127.355  | 126.5429 | 127.4313 |
| 12  | 131.8 | 144.6643 | 142.8375 | 143.3688 | 143.5656 |
| 13  | 31.7  | 36.20195 | 38.92645 | 39.03992 | 37.34865 |
| 14  | 36.6  | 43.80725 | 44.00595 | 43.15212 | 43.36165 |
| 15  | 26.8  | 31.61845 | 32.14635 | 31.92317 | 31.61655 |
| 16  | 23.8  | 25.32515 | 26.86675 | 26.99452 | 26.02005 |
| 17  | 40.7  | 34.78795 | 34.91915 | 34.54882 | 34.19425 |
| 18  | 17.3  | 18.89575 | 19.07955 | 19.14302 | 18.74355 |
| 19  | 16.4  | 17.40495 | 17.27205 | 17.49636 | 17.21035 |
| 28  | 28.1  | 29.19635 | 29.04675 | 28.98609 | 28.68855 |
| 29  | 72.7  | 72.82635 | 73.06125 | 73.18243 | 73.63985 |
| 30  | 14.5  | 18.67995 | 19.16325 | 18.71542 | 18.16935 |
| 1'  | 137.1 | 145.8532 | 143.0048 | 135.2197 | 136.7996 |
| 2'  | 136.7 | 142.9734 | 151.3554 | 152.1989 | 153.9867 |
| 3'  | 121.4 | 137.0203 | 136.7524 | 128.1573 | 135.0515 |
| 4'  | 118.3 | 136.3198 | 138.0437 | 136.6565 | 136.4768 |
| 5'  | 122.7 | 131.3691 | 130.3412 | 126.7607 | 129.6947 |
| 6'  | 124.9 | 134.2569 | 135.8272 | 135.8431 | 137.677  |
| 7'  | 111.6 | 128.2719 | 125.6428 | 127.0245 | 128.5756 |
| 8'  | 153.3 | 155.9307 | 158.8269 | 164.0677 | 166.1371 |
| 9'  | 173.7 | 174.9677 | 176.9105 | 177.5801 | 178.5274 |
| 10' | 43.4  | 46.92565 | 43.67835 | 46.33089 | 43.70025 |
| 11' | 64.5  | 76.89055 | 83.00425 | 78.1777  | 86.65625 |
| 12' | 22.8  | 23.87665 | 23.26725 | 23.88199 | 25.00775 |

## References and Notes

1. Spartan 04; Wavefunction Inc.: Irvine, CA.
2. Gaussian 09, Rev. C 01. Frisch, M. J.; Trucks, G. W.; Schlegel, H. B.; Scuseria, G. E.; Robb, M. A.; Cheeseman, J. R.; Scalmani, G.; Barone, V.; Mennucci, B.; Petersson, G. A.; Nakatsuji, H.; Caricato, M.; Li, X.; Hratchian, H. P.; Izmaylov, A. F.; Bloino, J.; Zheng, G.; Sonnenberg, J. L.; Hada, M.; Ehara, M.; Toyota, K.; Fukuda, R.; Hasegawa, J.; Ishida, M.; Nakajima, T.; Honda, Y.; Kitao, O.; Nakai, H.; Vreven,

T.; Montgomery, Jr., J. A.; Peralta, J. E.; Ogliaro, F.; Bearpark, M.; Heyd, J. J.; Brothers, E.; Kudin, K. N.; Staroverov, V. N.; Kobayashi, R.; Normand, J.; Raghavachari, K.; Rendell, A.; Burant, J. C.; Iyengar, S. S.; Tomasi, J.; Cossi, M.; Rega, N.; Millam, J. M.; Klene, M.; Knox, J. E.; Cross, J. B.; Bakken, V.; Adamo, C.; Jaramillo, J.; Gomperts, R.; Stratmann, R. E.; Yazyev, O.; Austin, A. J.; Cammi, R.; Pomelli, C.; Ochterski, J. W.; Martin, R. L.; Morokuma, K.; Zakrzewski, V. G.; Voth, G. A.; Salvador, P.; Dannenberg, J. J.; Dapprich, S.; Daniels, A. D.; Farkas, Ö.; Foresman, J. B.; Ortiz, J. V.; Cioslowski, J.; Fox, D. J. Gaussian, Inc., Wallingford CT, 2009.

3. Grimblat, N.; Zanardi, M. M.; Sarotti, A. M. *J. Org. Chem.* **2015**, *80*, 12526-12534.

### The NMR data analogy of compound **1** with model compounds.

The formation of an ester at the C-8' of **1** was further corroborated by comparing its C-8' chemical shift with those of the key carbons in the model compounds **1e**<sup>4</sup> and **1f**<sup>5</sup> (Figure S6), in which the chemical shift of C-8' at 153.3 of **1** is more close to that ( $\delta$ 150.8) of model **1e**. If it had an ether bond between C-8' and C-9', the C-8'(153.3 ppm) of **1** would be more deshielded than the key carbon (159.0 ppm) of **1f** due to the more deshielding chemical environments around the C-8' of **1**.

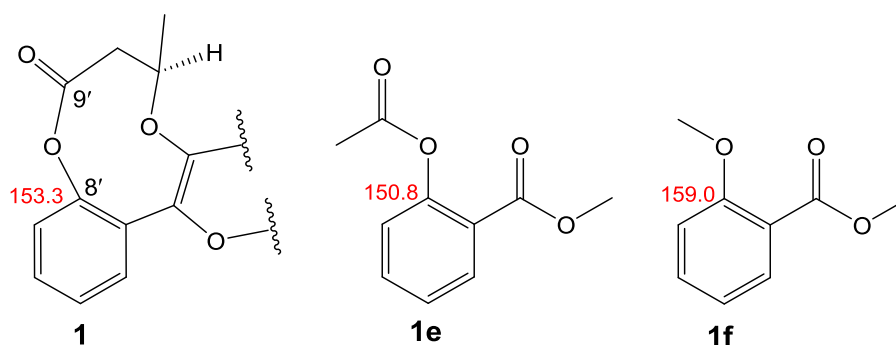

**Figure S6.** The key chemical shift of **1** and those of model compounds **1e** and **1f** (all measured in CDCl<sub>3</sub>).

### References

4. Liu, Y. Y.; Qi, J. M.; Bai, L. S.; Xu, Y. L.; Ma, N.; Sun, F. F. *Chin. Chem. Lett.* **2016**, 27, 726-730.
5. Li, P.; Zhao, J. J.; Lang, R.; Li, F. W. *Tetrahedron Lett.* **2014**, 55, 390–393.

**ECD Calculation for Compound 1.** The absolute configuration of compound **1** was determined by comparing the experimental ECD spectrum with quantum chemical TDDFT calculated theoretical ECD spectrum of the model compound **1a**. The B3LYP/6-31+G(d,p) optimized geometry in the NMR calculation was adopted for further computation. The energies, oscillator strengths, and rotational strengths of the first 60 electronic excitations were calculated using the TDDFT methodology at the B3LYP/6-311++G(2d,2p) level in vacuum. The ECD spectrum were simulated by the overlapping Gaussian function ( $\sigma = 0.6$  eV),<sup>6</sup> in which velocity rotatory strengths of the first 40 excited states were adopted.

In the 150-450 nm region (Figure 4), both the experimental and predicted ECD spectra showed first and second positive Cotton effects around 325 and 250 nm, and a third negative Cotton effect around 210 nm. Therefore, qualitative analysis of the predicted and experimental ECD spectra allowed the assignments of the absolute configuration of compound **1**.

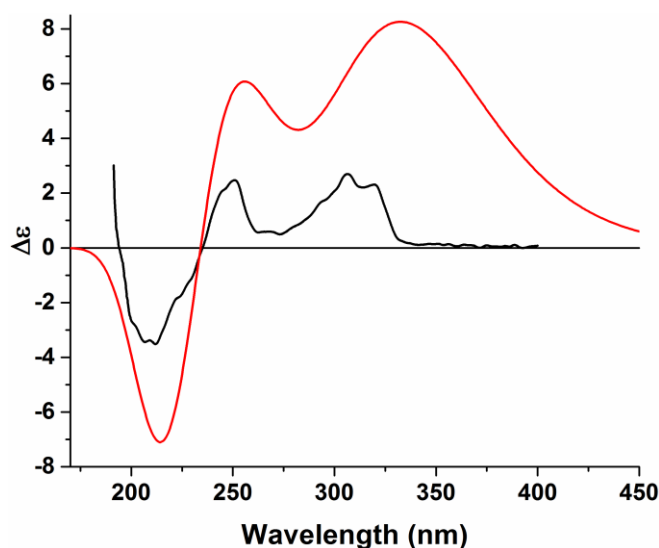

**Figure 4.** Experimental CD spectrum of compound **1** (black line) and calculated ECD spectrum of model compound **1a** (red line).

#### ECD simulation:

ECD spectrum of each conformation is simulated according to the overlapping Gaussian functions expressed as:

$$\Delta\varepsilon(E)=\frac{1}{2.296\times10^{-39}\sqrt{\pi}\sigma}\sum_i^A\Delta E_iR_ie^{[-(E-\Delta E_i)^2/\sigma^2]}$$

Where  $\sigma$  is half the bandwidth at 1/e peak height and expressed in energy units. The parameters  $\Delta E_i$  and  $R_i$  are the excitation energies and rotational strengths for the transition  $i$ , respectively.

The above function is converted to  $\Delta\varepsilon$ ,  $\lambda$  (wavelength) correlations as:

$$\Delta\varepsilon(\lambda)=\frac{1}{2.296\times10^{-39}\sqrt{\pi}\sigma}\sum_i^A\Delta E_iR_ie^{[-(1240/\lambda-\Delta E_i)^2/\sigma^2]}$$

and then simulation were accomplished by using the Excel 2003 and the Origin 7.0 software.

To get the final spectra, all the simulated spectra of conformations of each compound were averaged according to their energy and the Boltzmann distribution theory expressed as:

$$\frac{N_i^*}{N} = \frac{g_i e^{-\varepsilon_i/k_B T}}{\sum g_i e^{-\varepsilon_i/k_B T}}$$

#### Calculated ECD Data:

| State | C1                      |                     |
|-------|-------------------------|---------------------|
|       | Excitation energies(eV) | Rotatory Strengths* |
| 1     | 3.7147                  | 49.131              |
| 2     | 3.879                   | 1.7854              |
| 3     | 4.0347                  | 7.6697              |
| 4     | 4.3784                  | -11.344             |
| 5     | 4.5004                  | 6.0155              |
| 6     | 4.5899                  | -2.3222             |
| 7     | 4.6278                  | -4.5194             |
| 8     | 4.6807                  | 0.0522              |
| 9     | 4.7488                  | -1.4255             |
| 10    | 4.7889                  | 3.2677              |
| 11    | 4.869                   | -0.152              |
| 12    | 4.9542                  | -6.0769             |

|    |        |          |
|----|--------|----------|
| 13 | 4.9671 | 32.3218  |
| 14 | 5.1009 | -0.7893  |
| 15 | 5.1229 | 11.3898  |
| 16 | 5.1402 | 17.0172  |
| 17 | 5.1941 | 5.9966   |
| 18 | 5.3202 | 0.2926   |
| 19 | 5.3577 | 33.3483  |
| 20 | 5.3723 | -62.0494 |
| 21 | 5.3931 | -6.5887  |
| 22 | 5.4171 | -0.8838  |
| 23 | 5.4887 | 8.9872   |
| 24 | 5.4921 | 15.7828  |
| 25 | 5.5027 | -5.8675  |
| 26 | 5.5127 | -7.3124  |
| 27 | 5.5167 | -16.8189 |
| 28 | 5.5454 | 2.7086   |
| 29 | 5.5531 | 0.2825   |
| 30 | 5.5776 | 1.2251   |
| 31 | 5.6131 | -4.5025  |
| 32 | 5.6628 | -1.5006  |
| 33 | 5.6738 | -0.9458  |
| 34 | 5.6802 | 5.9273   |
| 35 | 5.7074 | -0.7577  |
| 36 | 5.7236 | -2.0425  |
| 37 | 5.7331 | 1.1068   |
| 38 | 5.8003 | -4.4273  |
| 39 | 5.8122 | -19.3866 |
| 40 | 5.8395 | 6.1074   |
| 41 | 5.8399 | -0.2306  |
| 42 | 5.8421 | -7.3568  |
| 43 | 5.8877 | -4.1287  |
| 44 | 5.8953 | -17.8094 |
| 45 | 5.9325 | 1.8982   |
| 46 | 5.9416 | 5.1326   |
| 47 | 5.9491 | -9.5241  |
| 48 | 5.9547 | -2.0005  |
| 49 | 6.0183 | -4.5707  |
| 50 | 6.0297 | -2.0942  |
| 51 | 6.0326 | 0.5544   |
| 52 | 6.0845 | 18.0536  |
| 53 | 6.0911 | -9.8168  |
| 54 | 6.1016 | 3.1388   |
| 55 | 6.1122 | 6.7369   |

|    |        |          |
|----|--------|----------|
| 56 | 6.1466 | -4.3245  |
| 57 | 6.1566 | 1.4889   |
| 58 | 6.166  | 2.1568   |
| 59 | 6.1749 | -0.3546  |
| 60 | 6.1778 | -18.5752 |

\* R(velocity)  $10^{-40}$  erg-esu-cm

### References and Notes

6. Stephens, P. J.; Harada, N. ECD cotton effect approximated by the Gaussian curve and other methods. *Chirality* **2010**, 22, 229–233.



**Figure S7.**  $^1\text{H}$  NMR spectrum of phainanolide A (**1**) in  $\text{CDCl}_3$

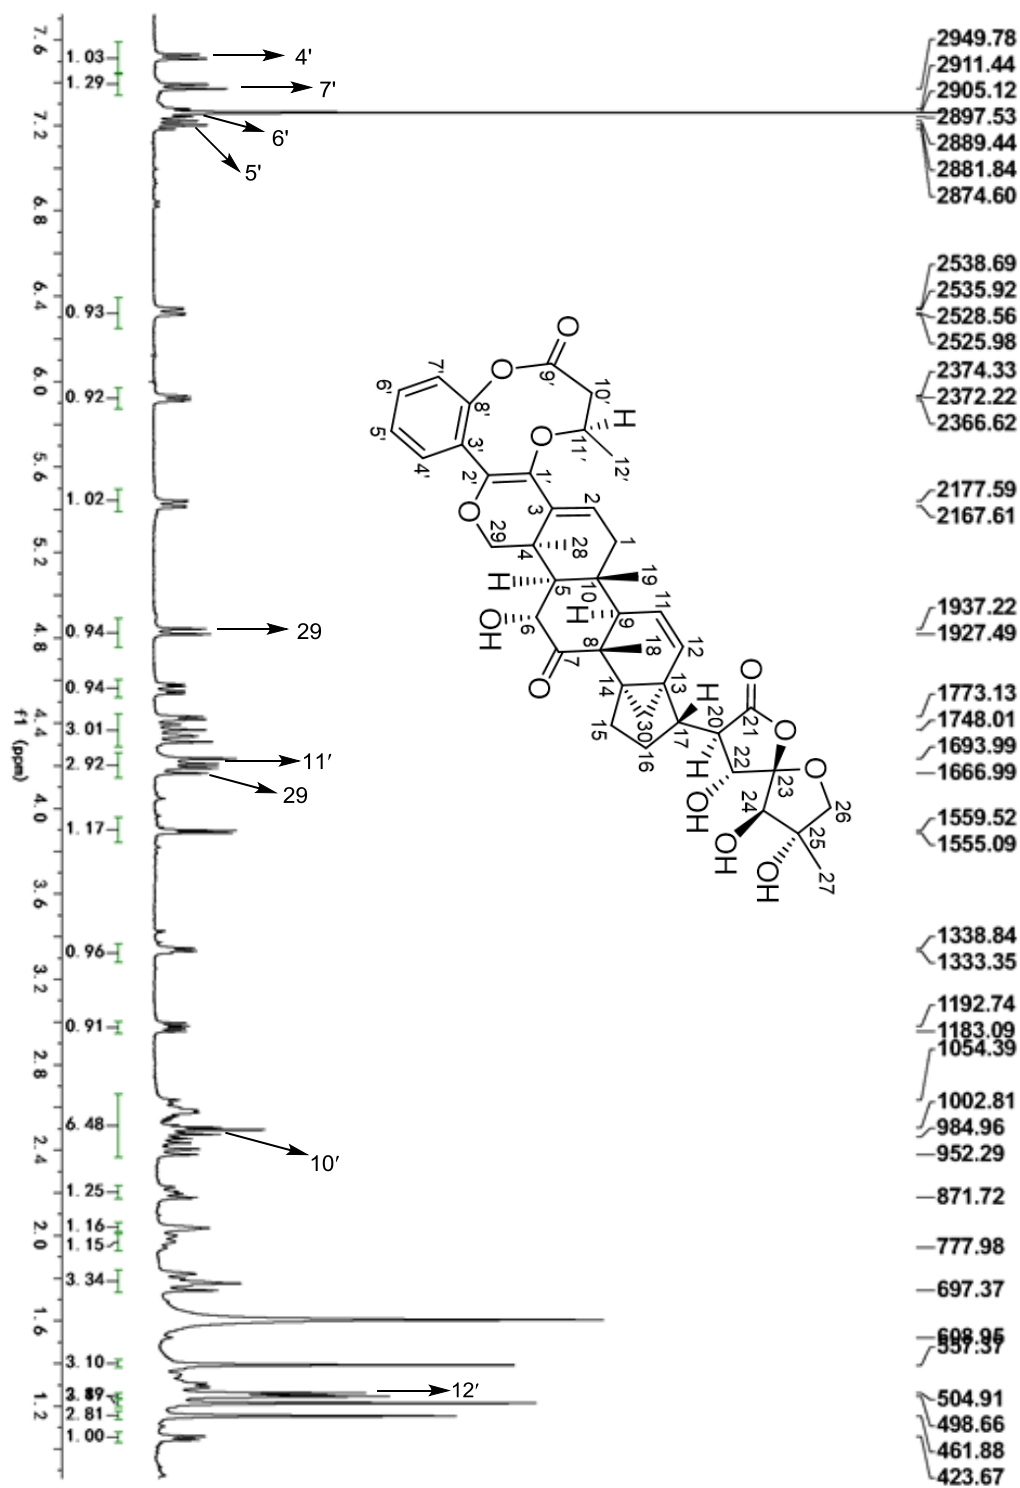

**Figure S8.**  $^{13}\text{C}$  NMR spectrum of phainanolide A (**1**) in  $\text{CDCl}_3$

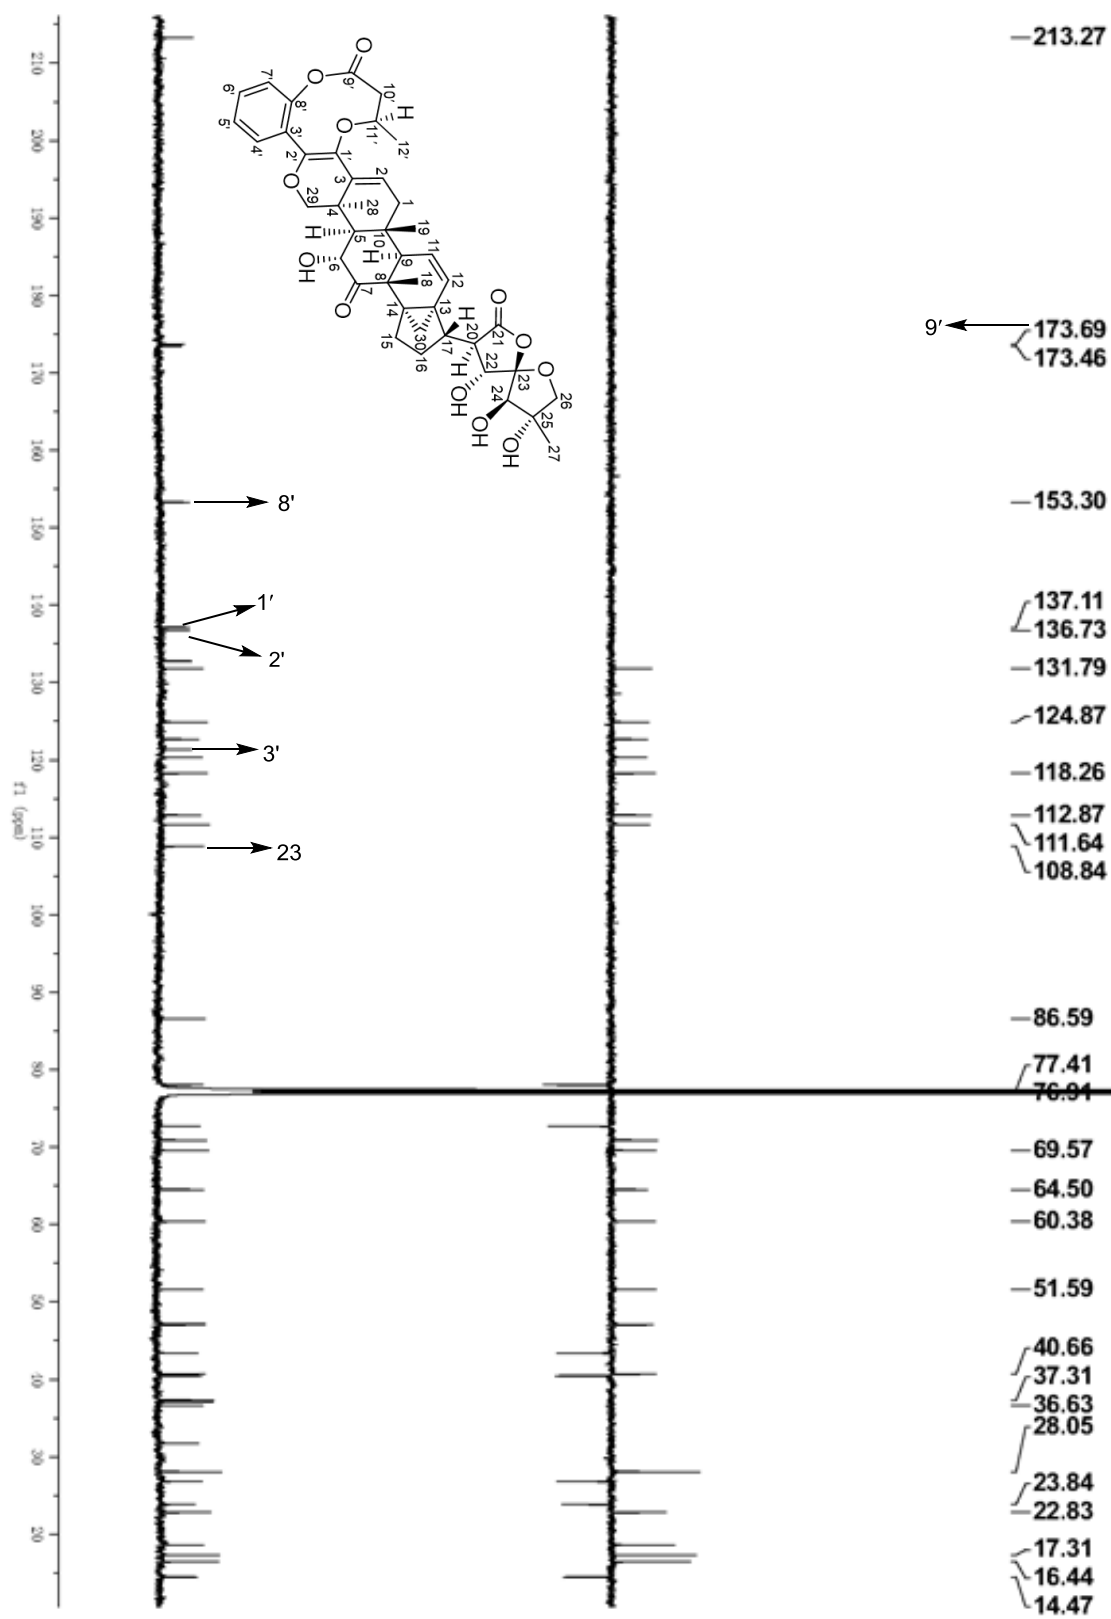

**Figure S9.** HSQC spectrum of phainanolide A (**1**) in CDCl<sub>3</sub>

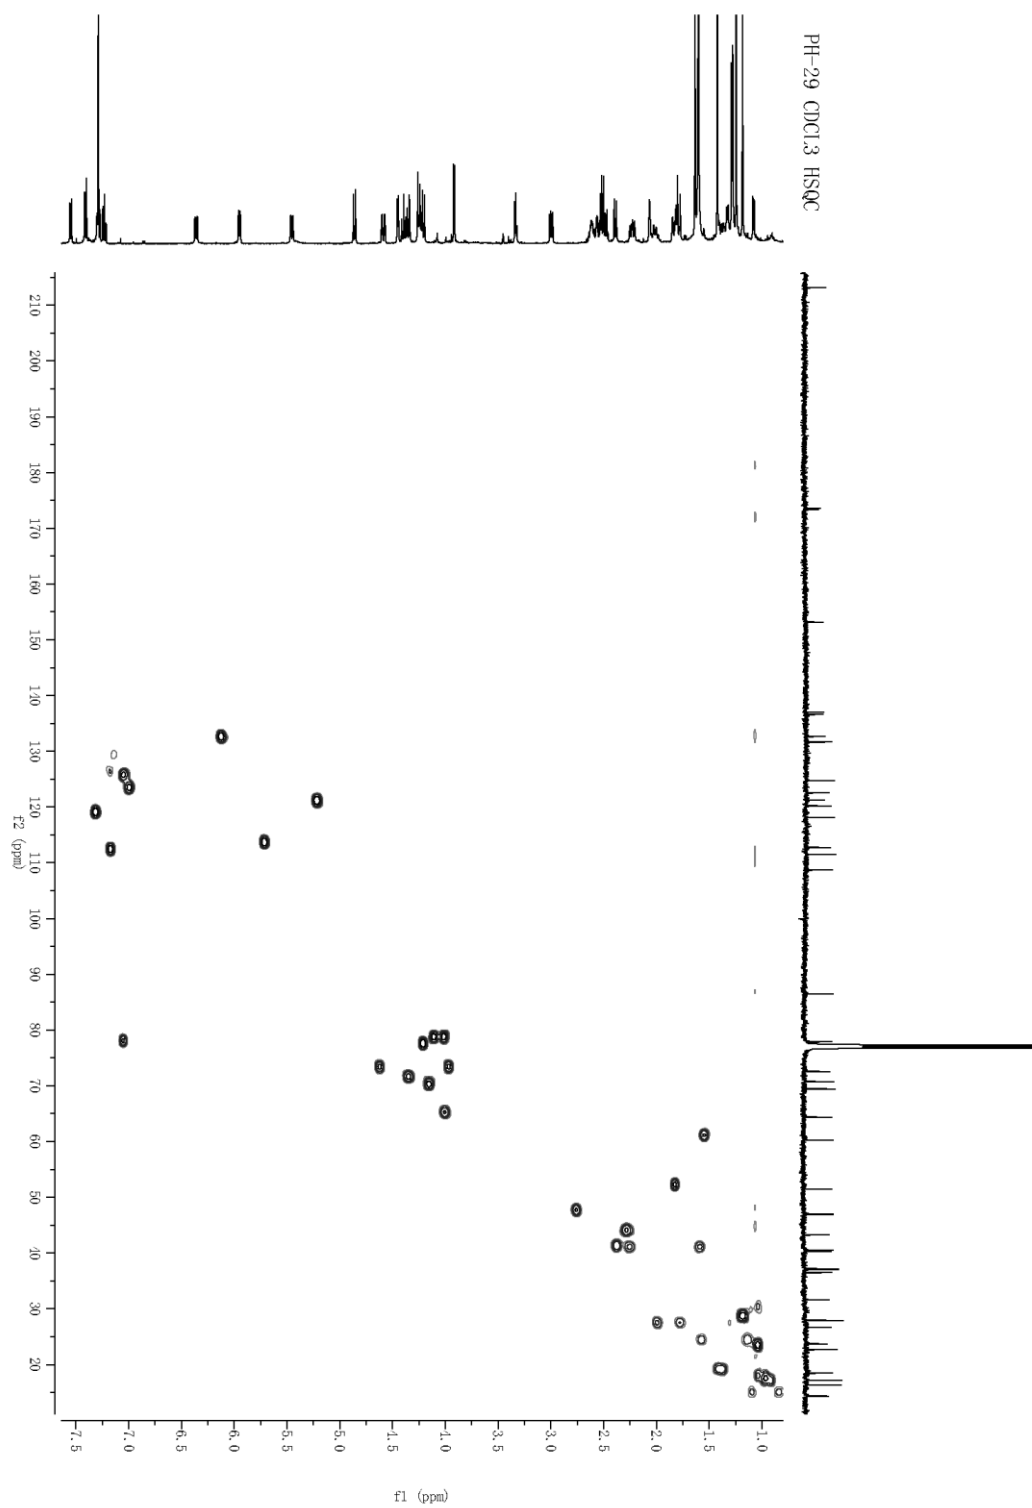

**Figure S10.** HMBC spectrum of phainanolide A (**1**) in CDCl<sub>3</sub>

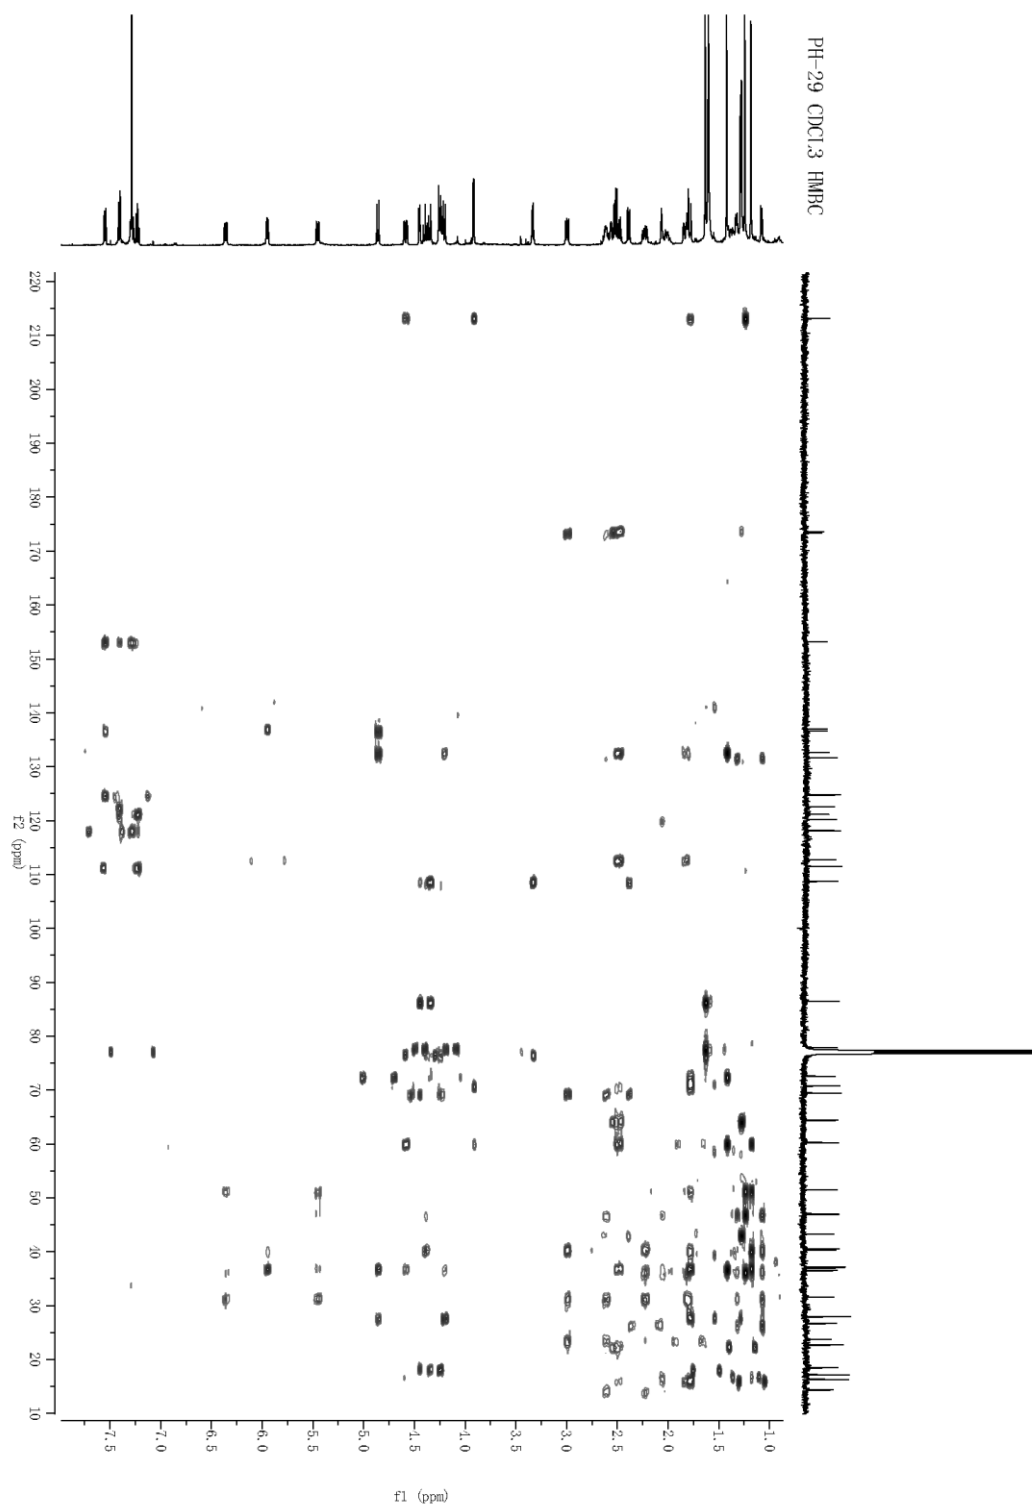

**Figure S11.**  $^1\text{H}$ - $^1\text{H}$  COSY spectrum of phainanolide A (**1**) in  $\text{CDCl}_3$

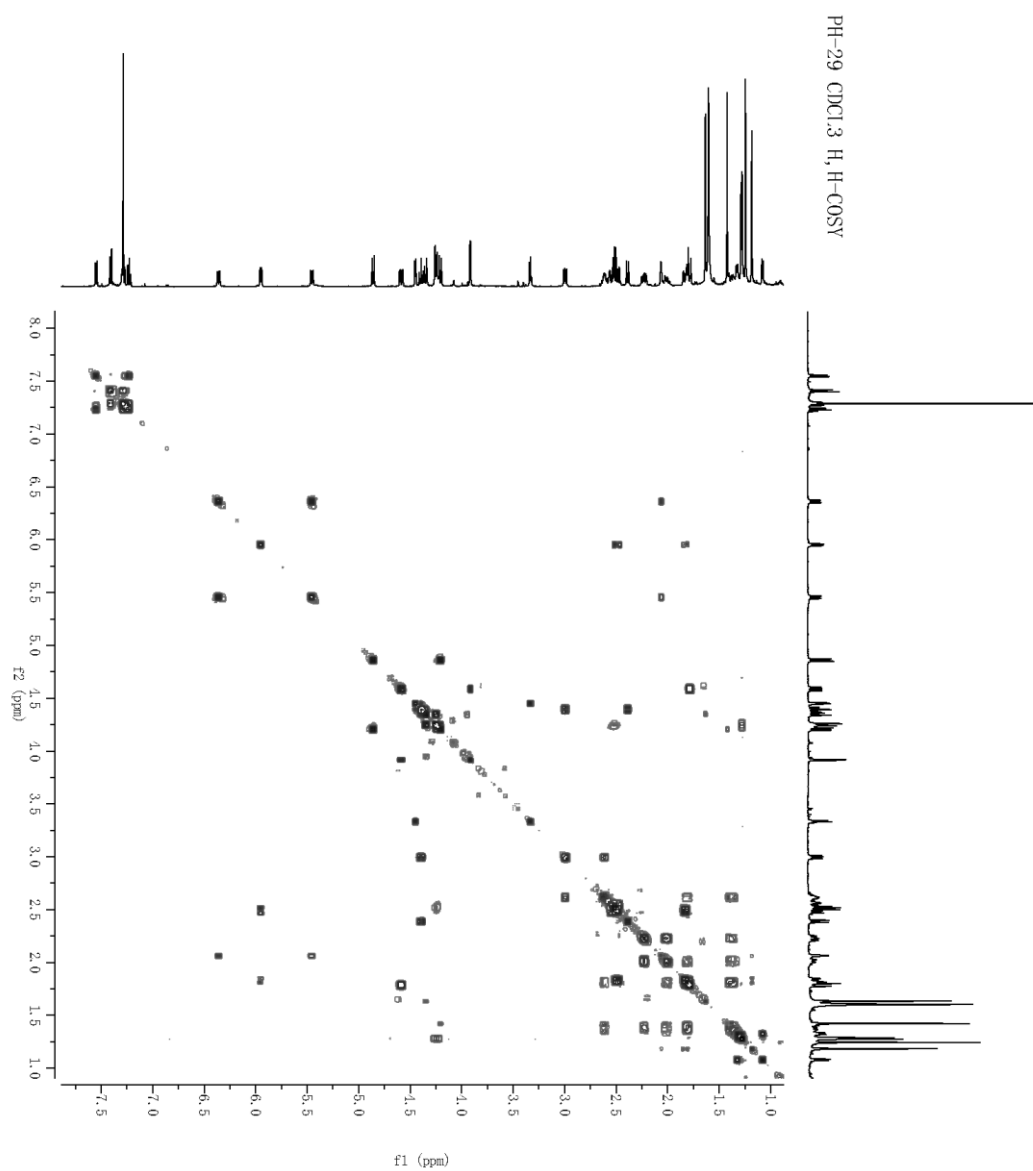

**Figure S12.** NOESY spectrum of phainanolide A (**1**) in CDCl<sub>3</sub>

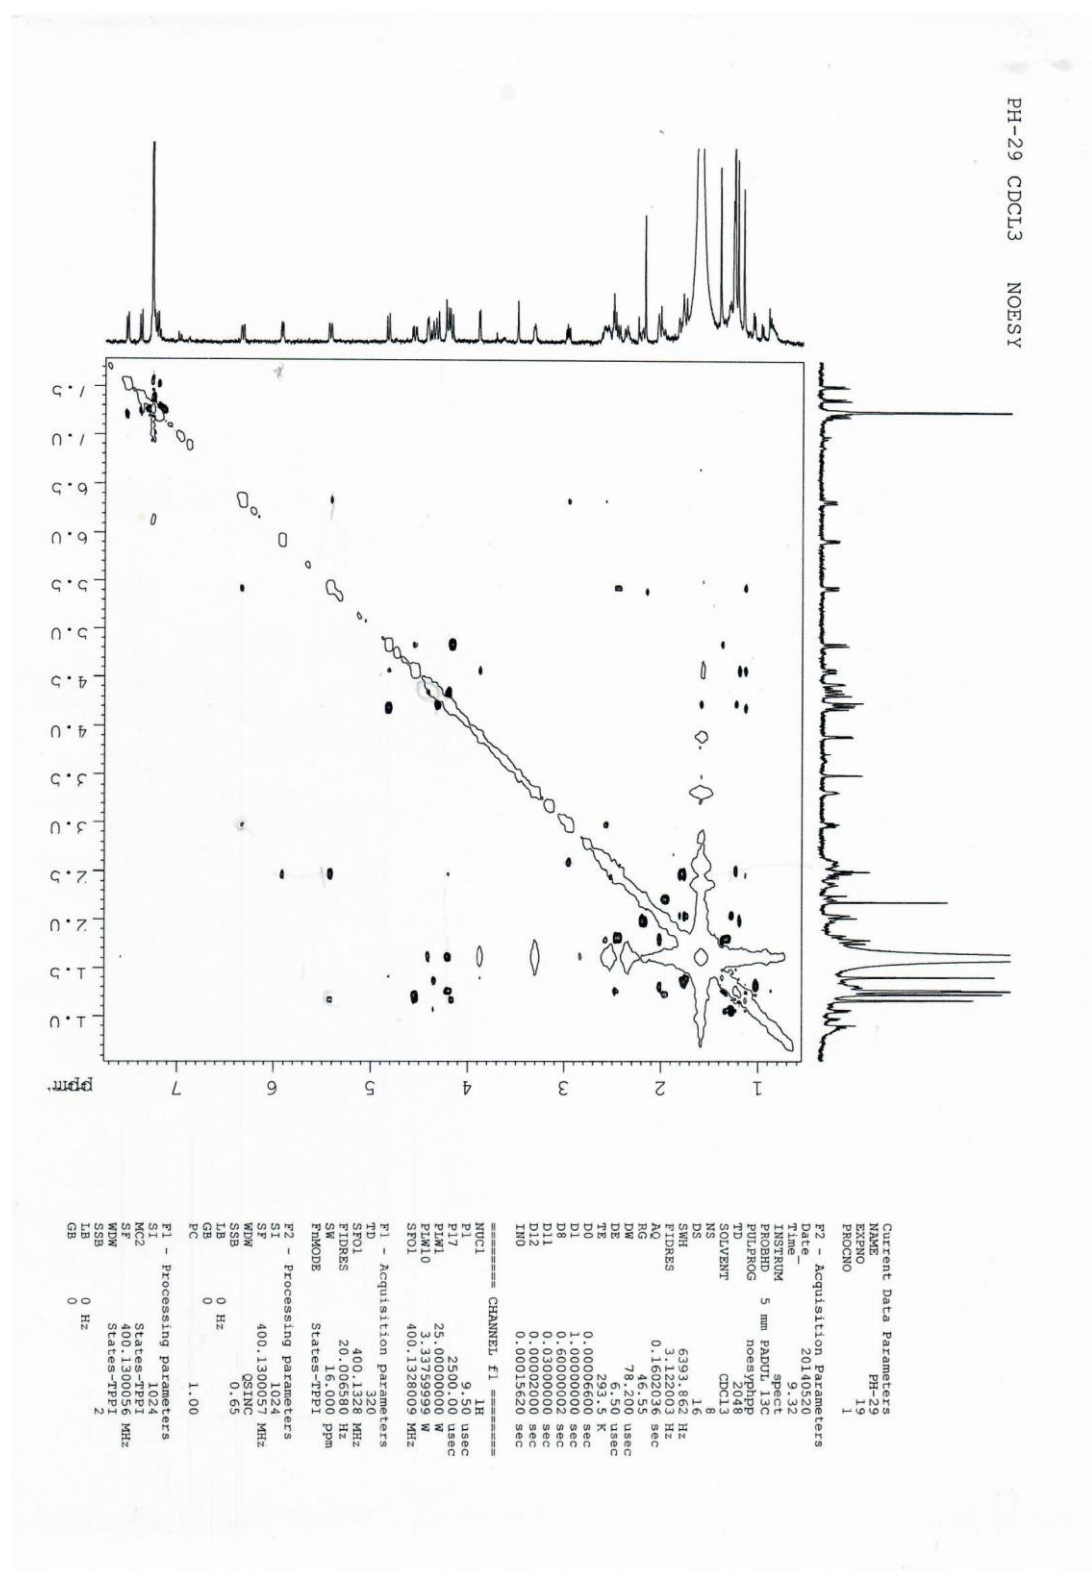

**Figure S13.** ESI(+)-MS spectrum of phainanolide A (1)

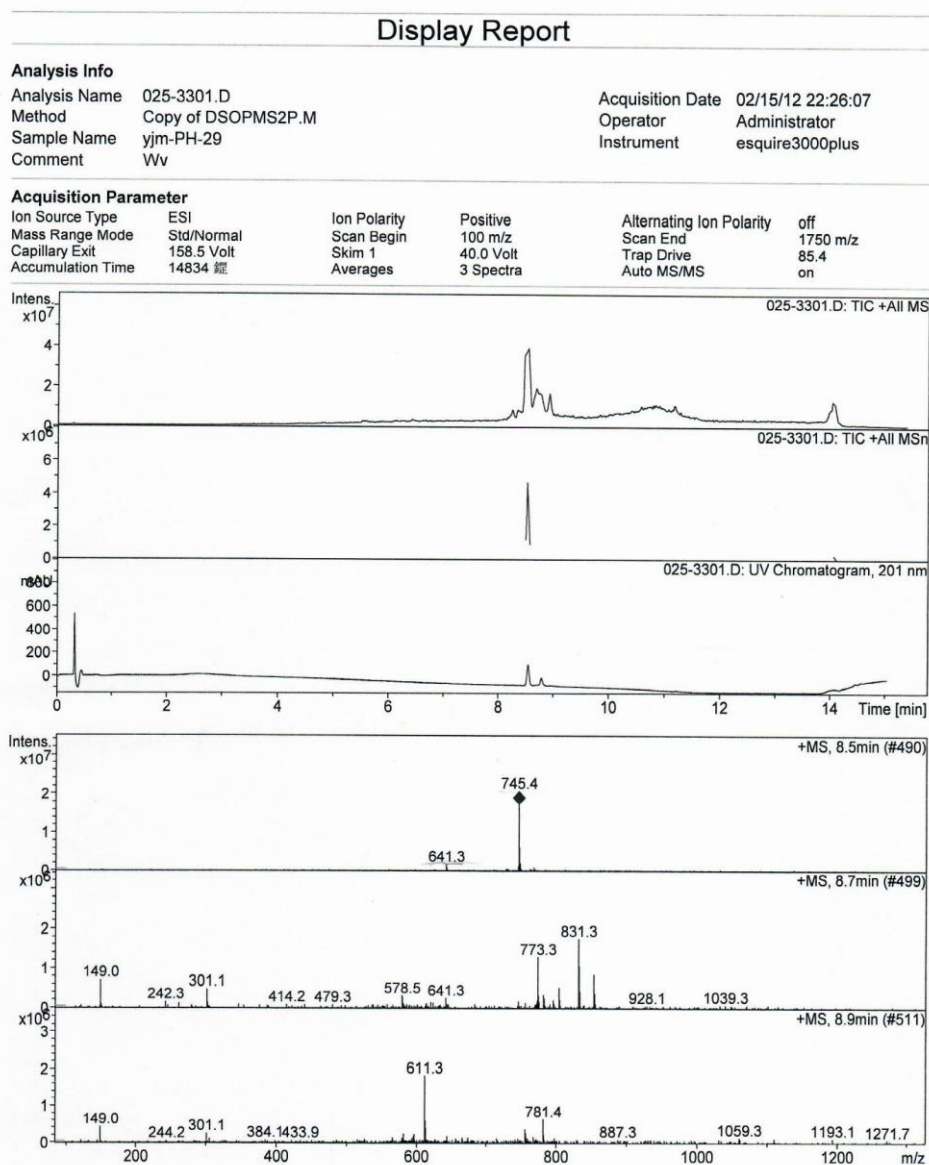

## Display Report

---

**Analysis Info**

|               |                    |                  |                   |
|---------------|--------------------|------------------|-------------------|
| Analysis Name | 025-4201.D         | Acquisition Date | 02/16/12 00:52:50 |
| Method        | Copy of DSOPMS2N.M | Operator         | Administrator     |
| Sample Name   | yjm-PH-29          | Instrument       | esquire3000plus   |
| Comment       | Wv                 |                  |                   |

---

**Acquisition Parameter**

|                   |             |              |            |                          |          |
|-------------------|-------------|--------------|------------|--------------------------|----------|
| Ion Source Type   | ESI         | Ion Polarity | Negative   | Alternating Ion Polarity | off      |
| Mass Range Mode   | Std/Normal  | Scan Begin   | 100 m/z    | Scan End                 | 1750 m/z |
| Capillary Exit    | -158.5 Volt | Skim 1       | -40.0 Volt | Trap Drive               | 92.9     |
| Accumulation Time | 14766 經     | Averages     | 3 Spectra  | Auto MS/MS               | on       |

---

025-4201.D: TIC -All MS

025-4201.D: TIC -All MSn

025-4201.D: UV Chromatogram, 200 nm

Time [min]

---

-MS, 8.5min (#494)

-MS, 8.7min (#502)

-MS, 8.9min (#514)

m/z

---

Bruker Daltonics DataAnalysis 3.1

printed: 02/16/12 13:28:14

Page 1 of 1



**Figure S15.** HRESI(–)MS spectrum of phainanolide A (1)

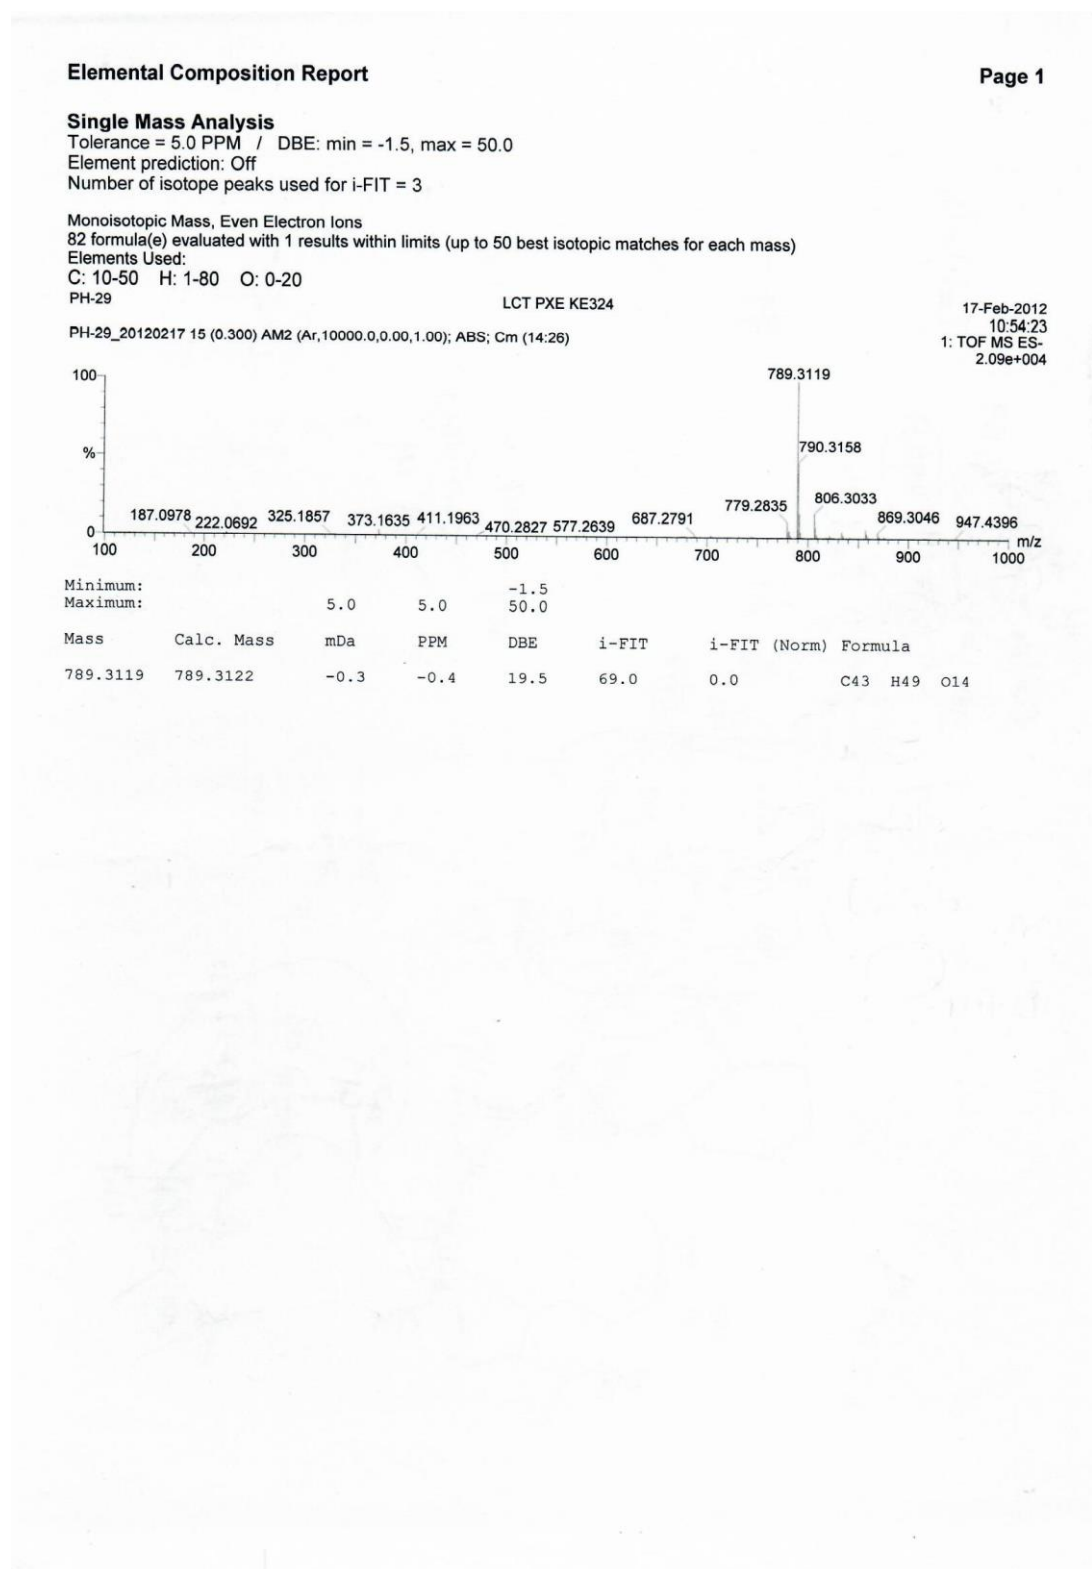

**Figure S16.** IR spectrum of phainanolid A (**1**)

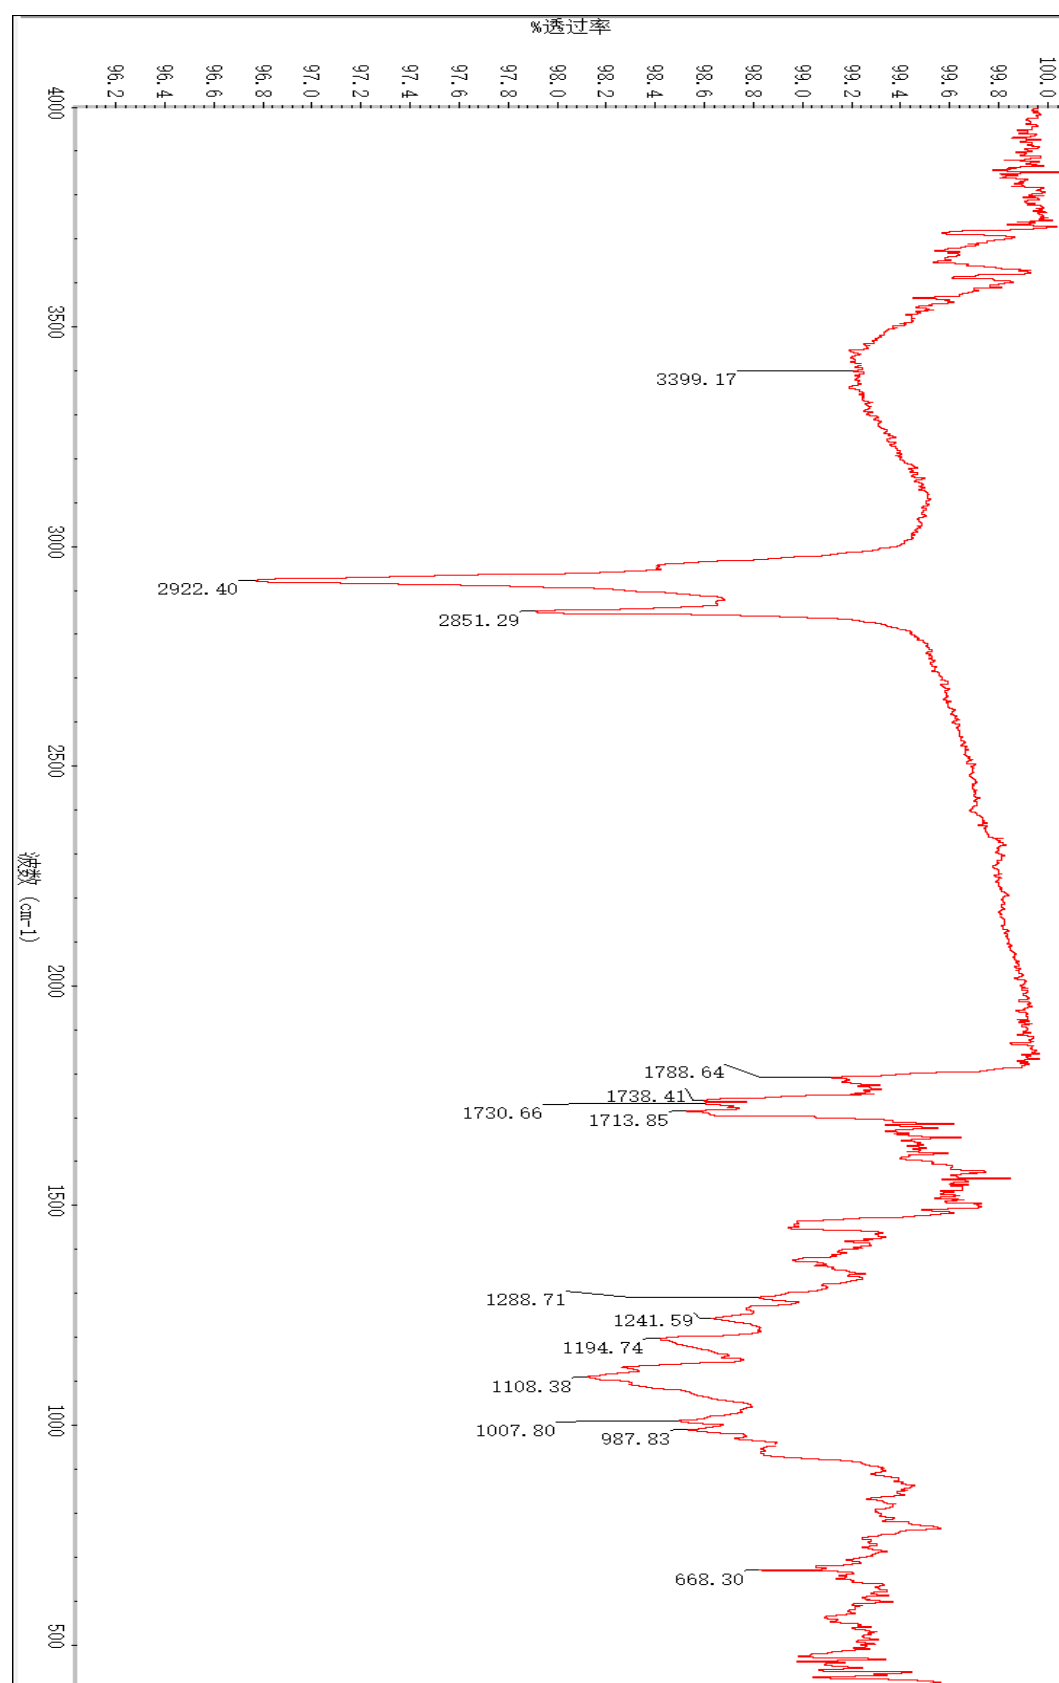

**Figure S17.**  $^1\text{H}$  NMR spectrum of phainanoid G (**2**) in  $\text{CDCl}_3$

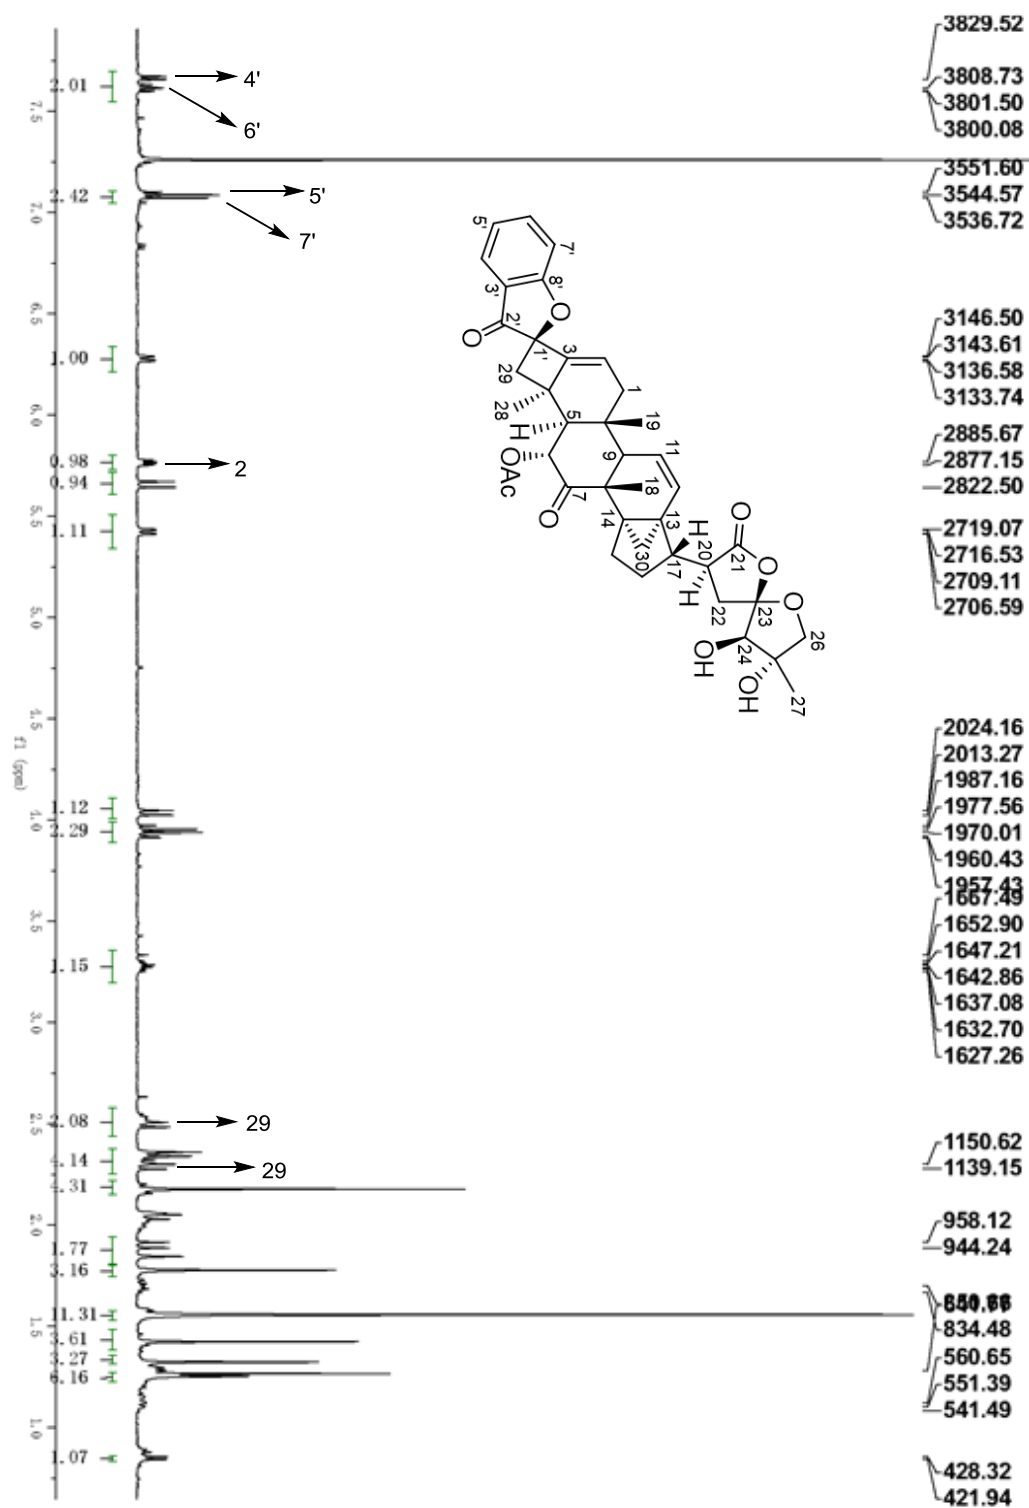

**Figure S18.**  $^{13}\text{C}$  NMR spectrum of phainanoid G (**2**) in  $\text{CDCl}_3$

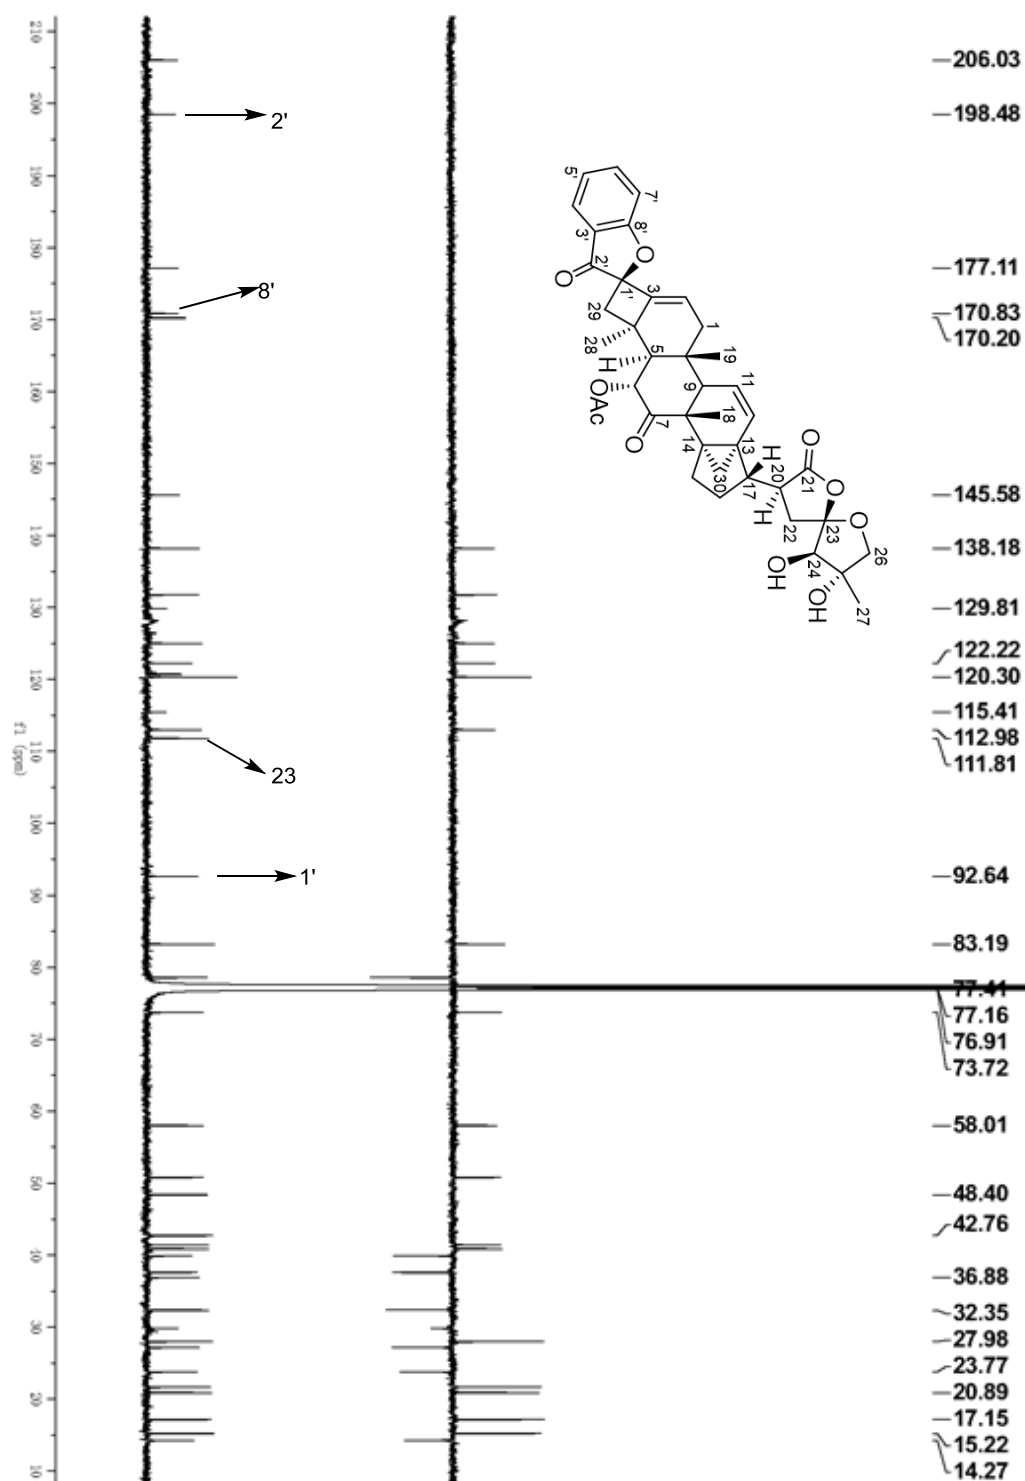

**Figure S19.** HSQC spectrum of phainanoid G (**2**) in CDCl<sub>3</sub>

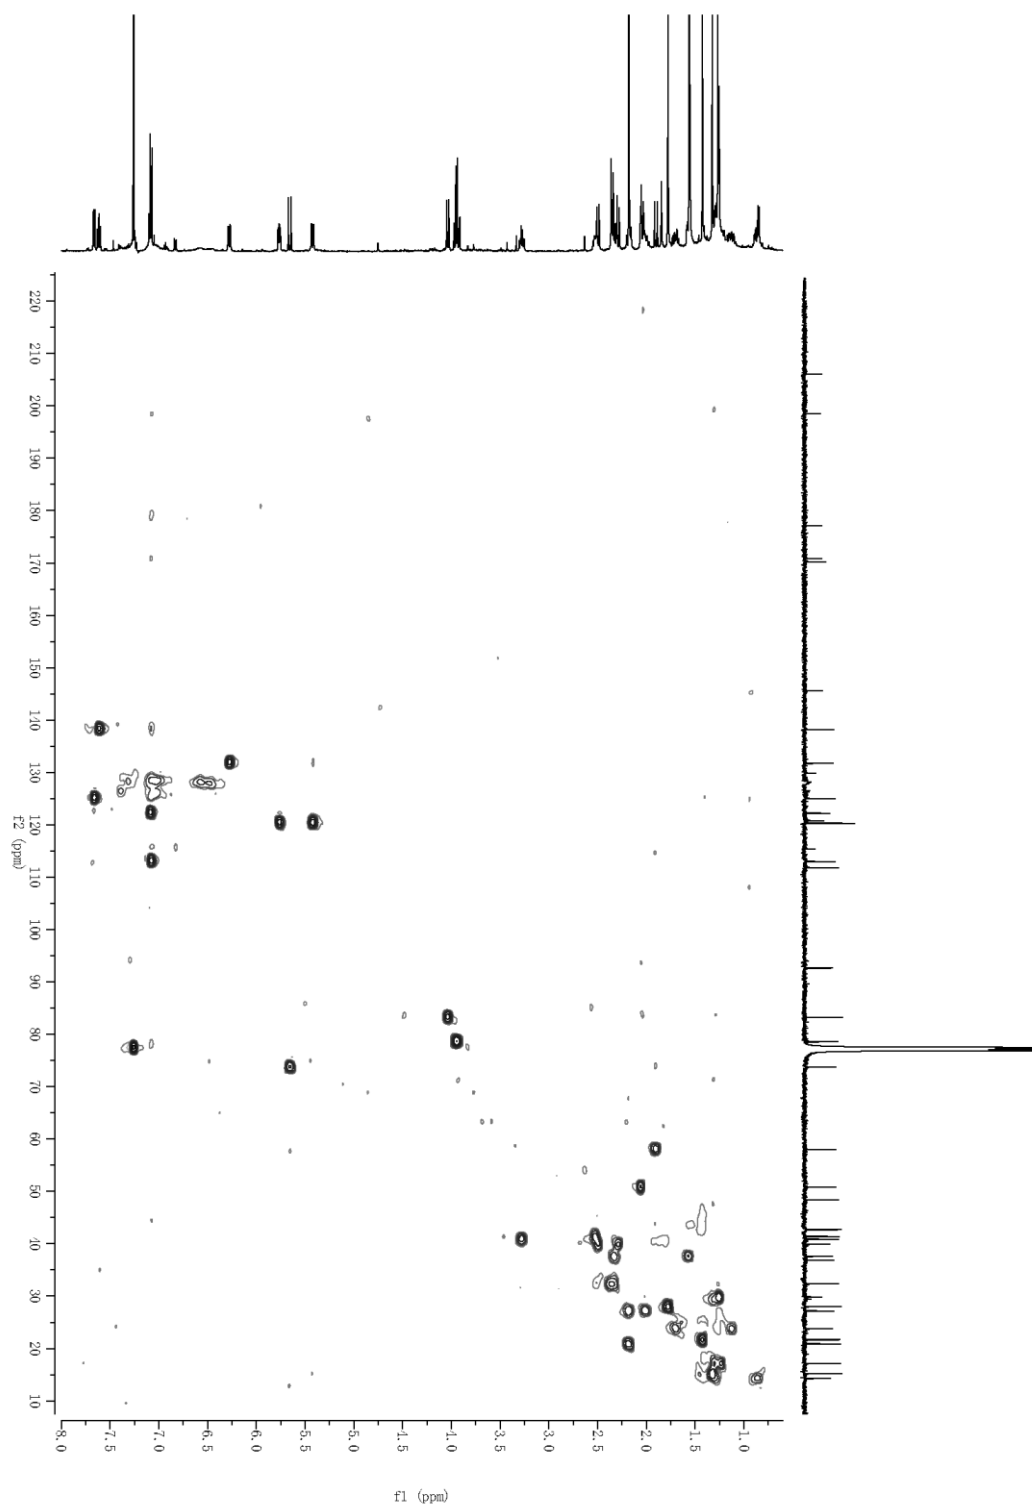

**Figure S20.** HMBC spectrum of phainanoid G (**2**) in CDCl<sub>3</sub>

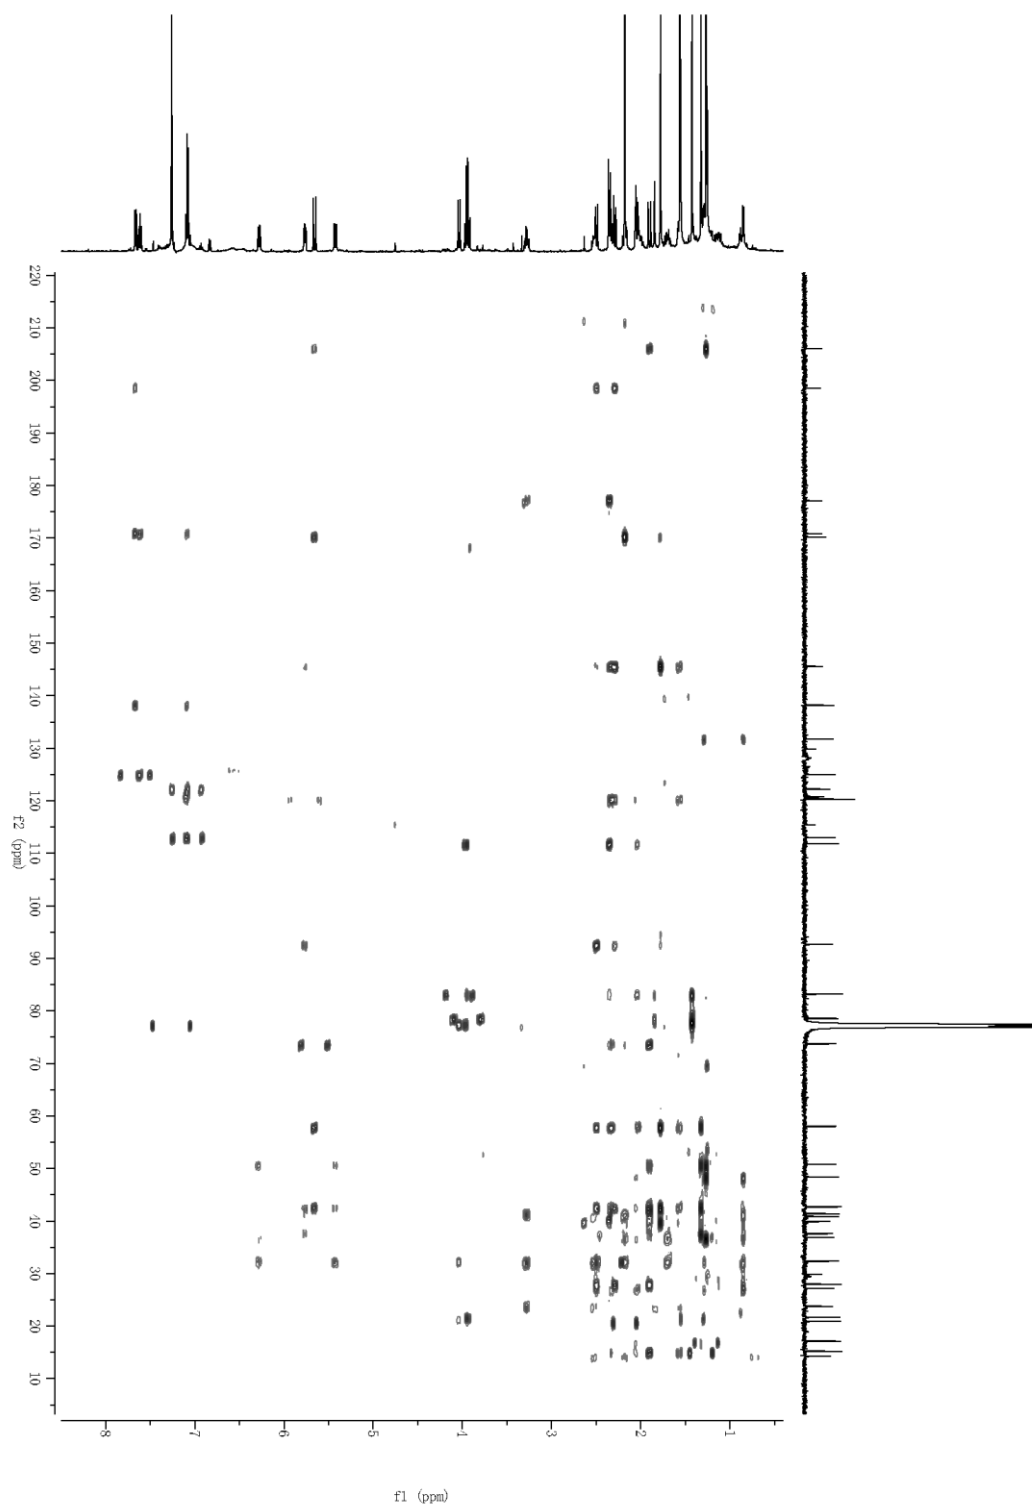

**Figure S21.**  $^1\text{H}$ - $^1\text{H}$  COSY spectrum of phainanoid G (**2**) in  $\text{CDCl}_3$

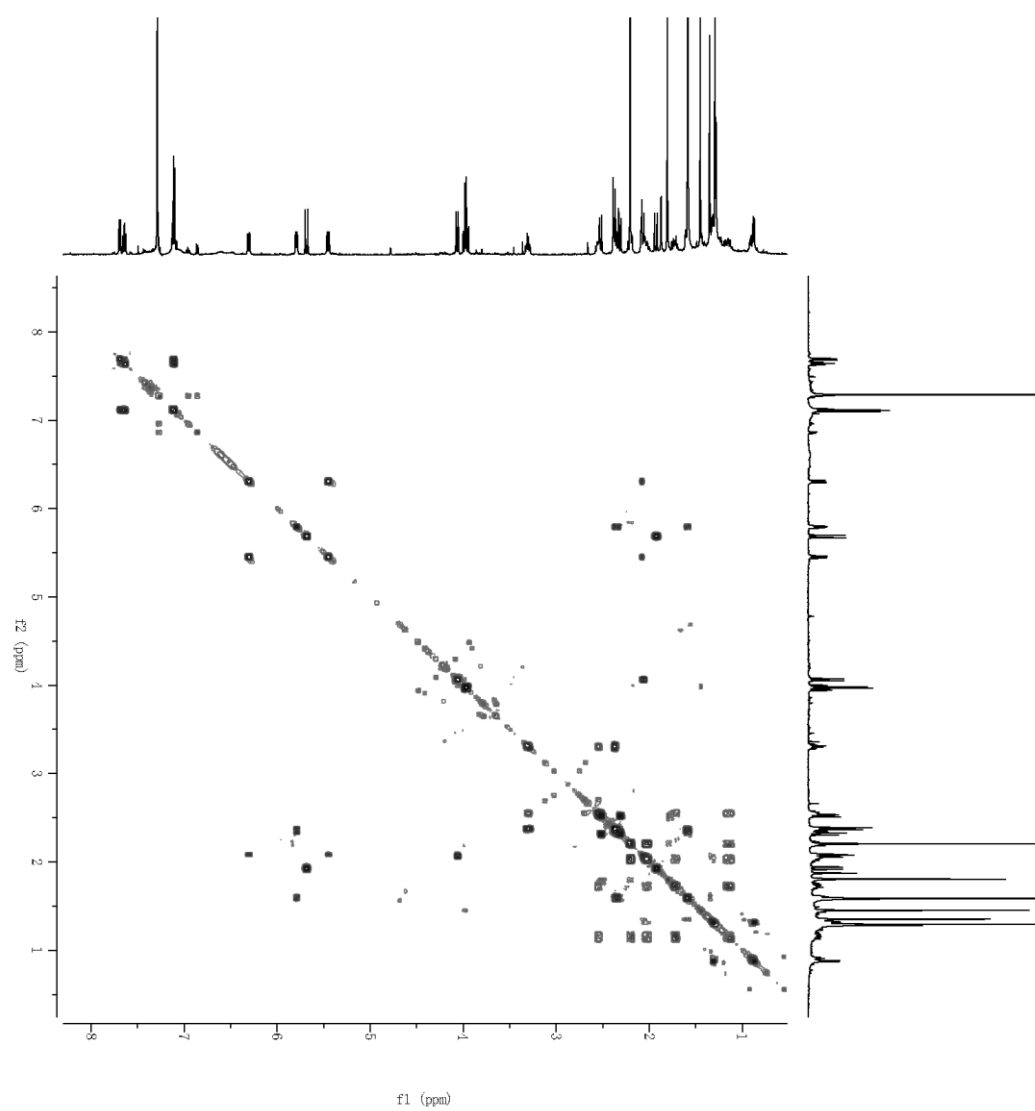

**Figure S22.** ROESY spectrum of phainanoid G (**2**) in CDCl<sub>3</sub>

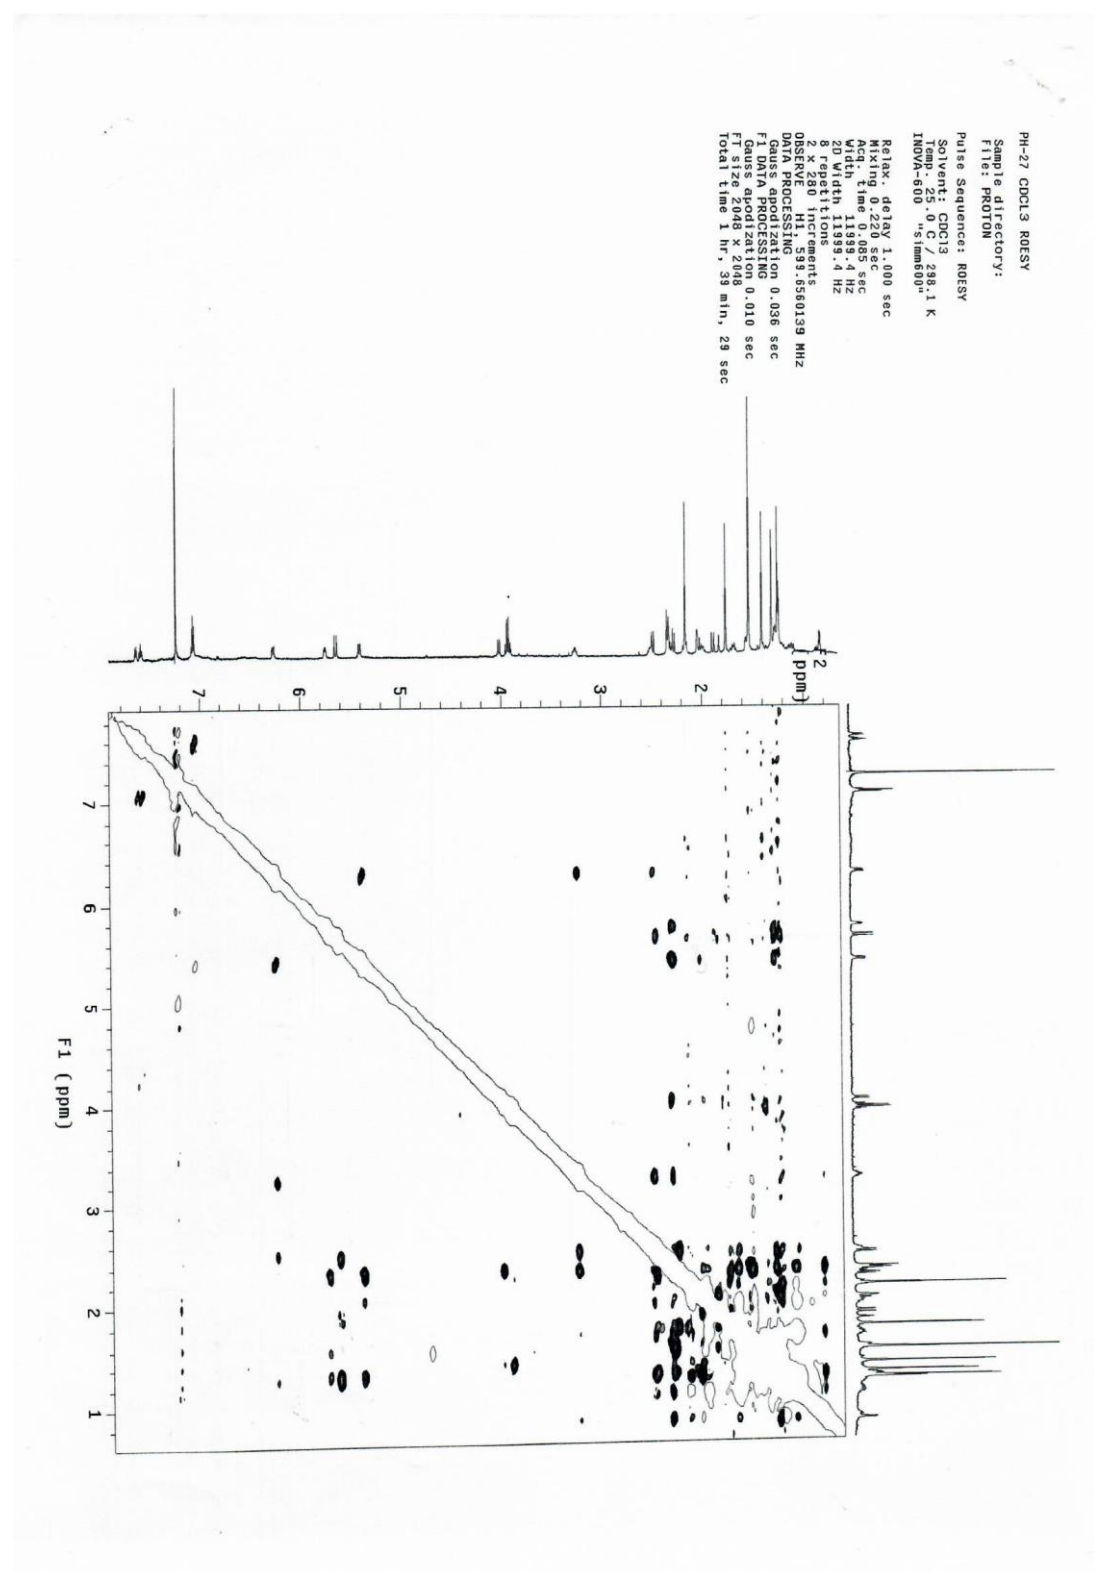



**Figure S23.** ESI(+)MS spectrum of phainanoid G (2)

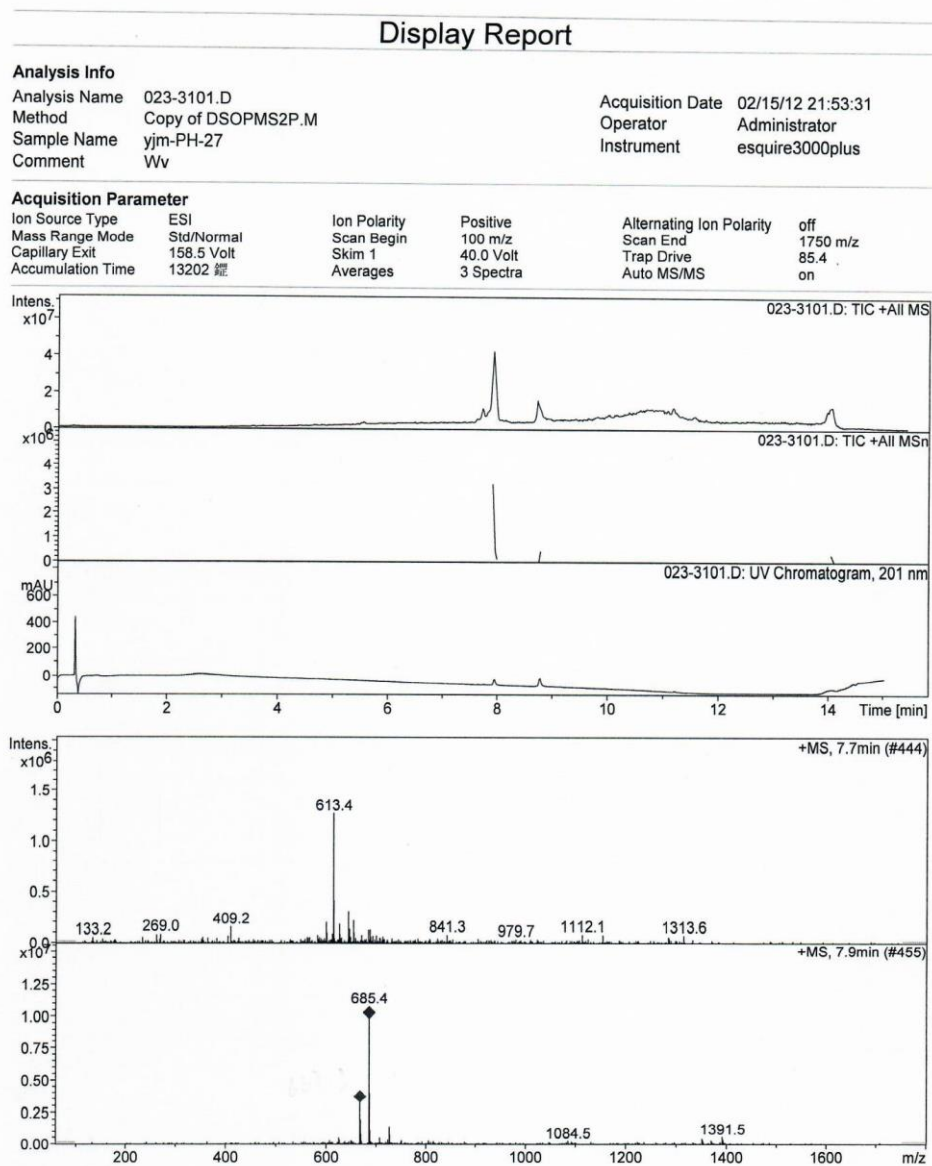

**Figure S24.** ESI(–)MS spectrum of phainanoid G (2)

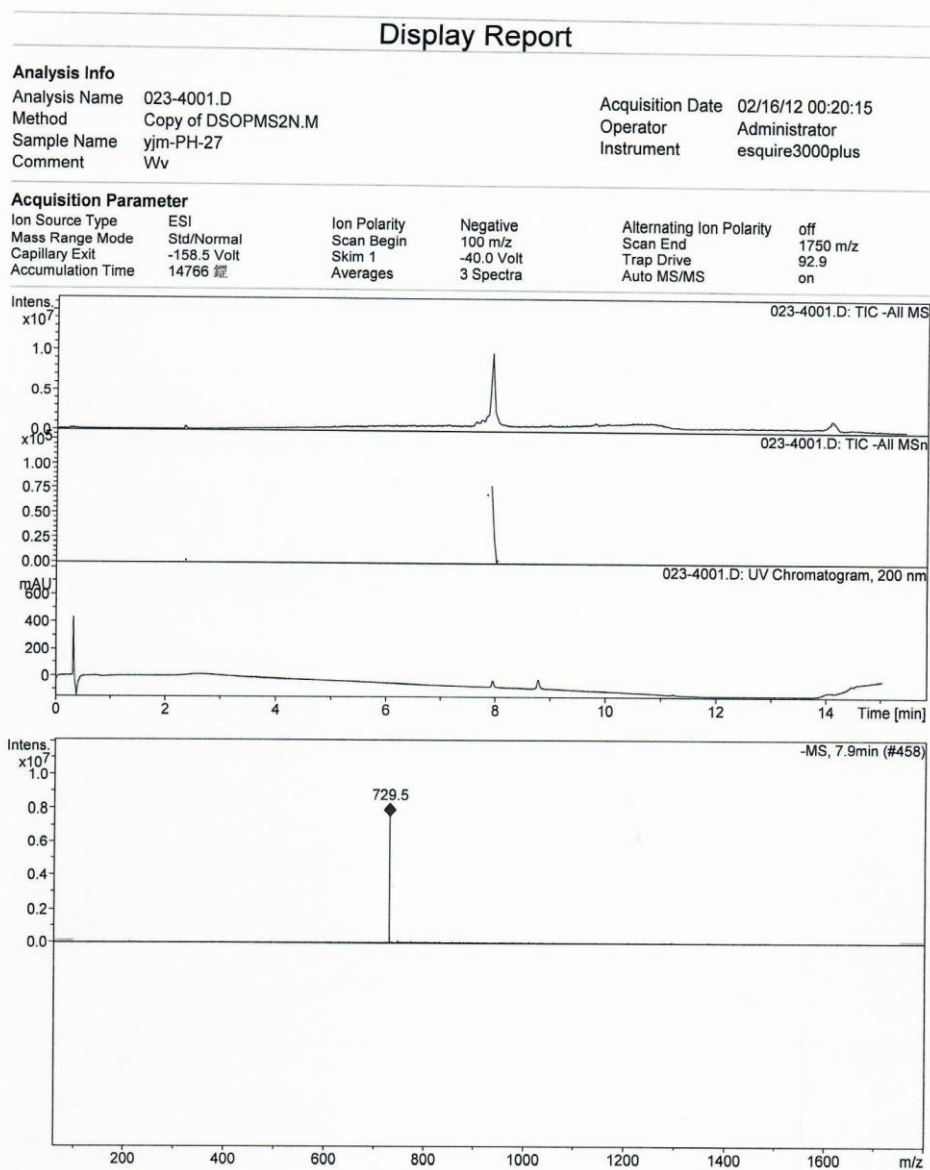

**Figure S25.** HRESI(–)MS spectrum of phainanoid G (2)

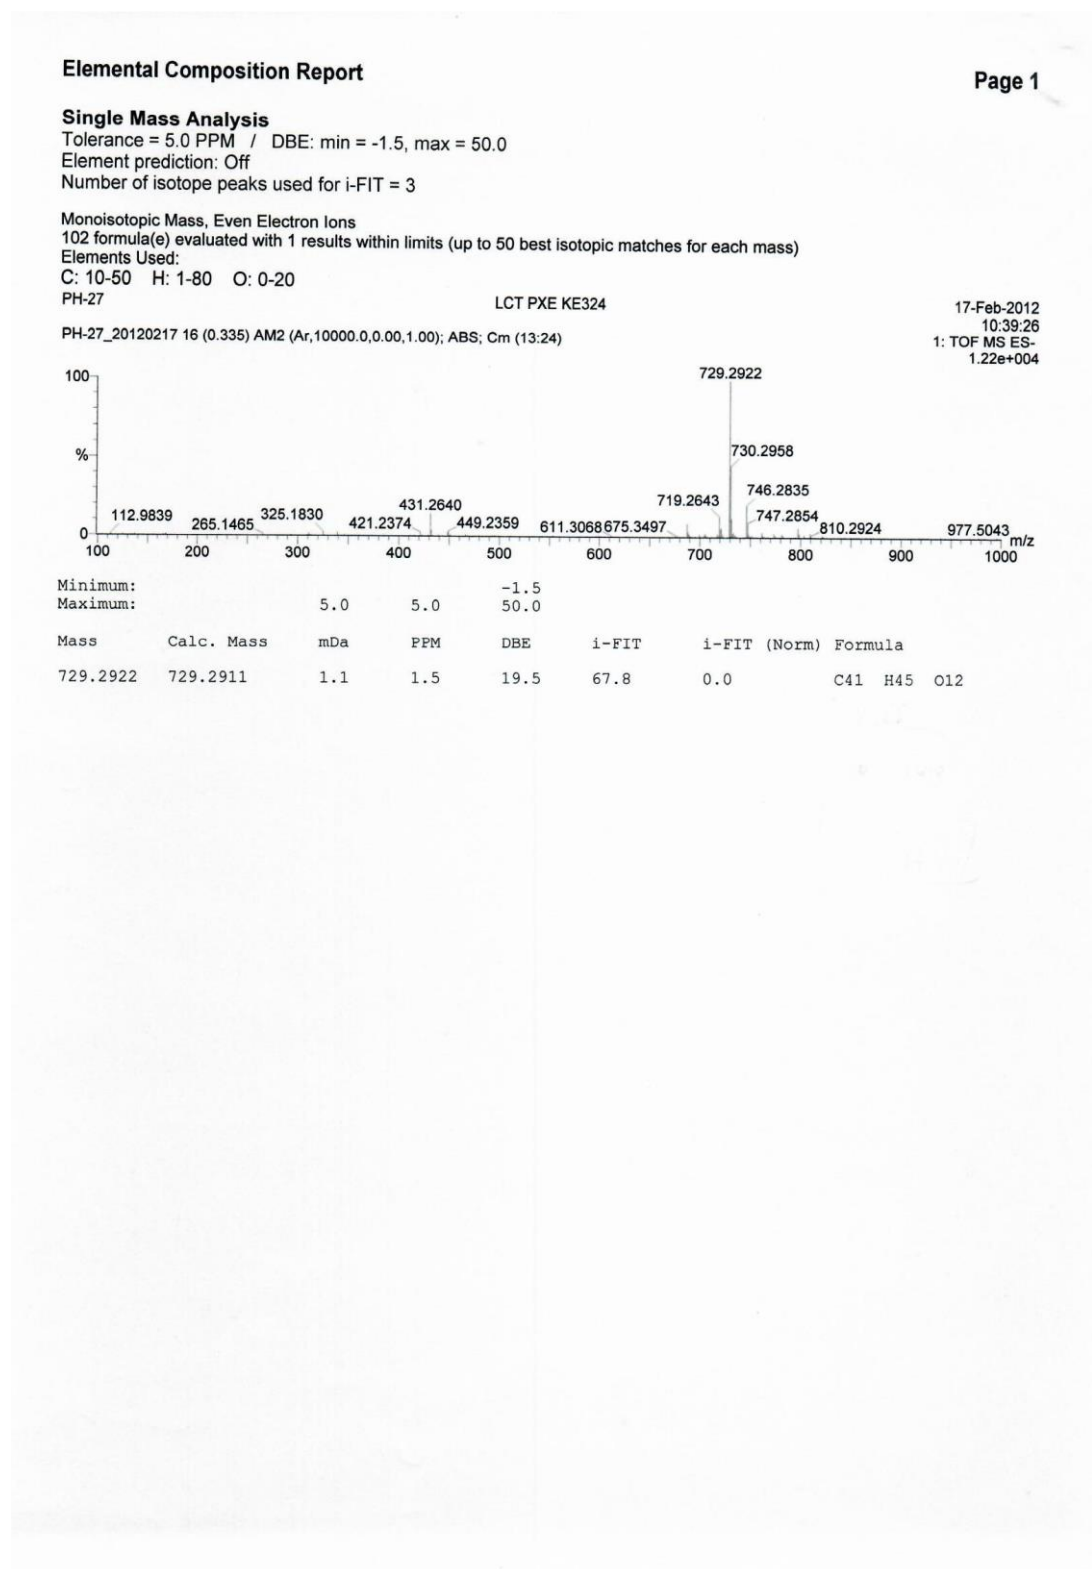

**Figure S26.** IR spectrum of phainanoid G (2)

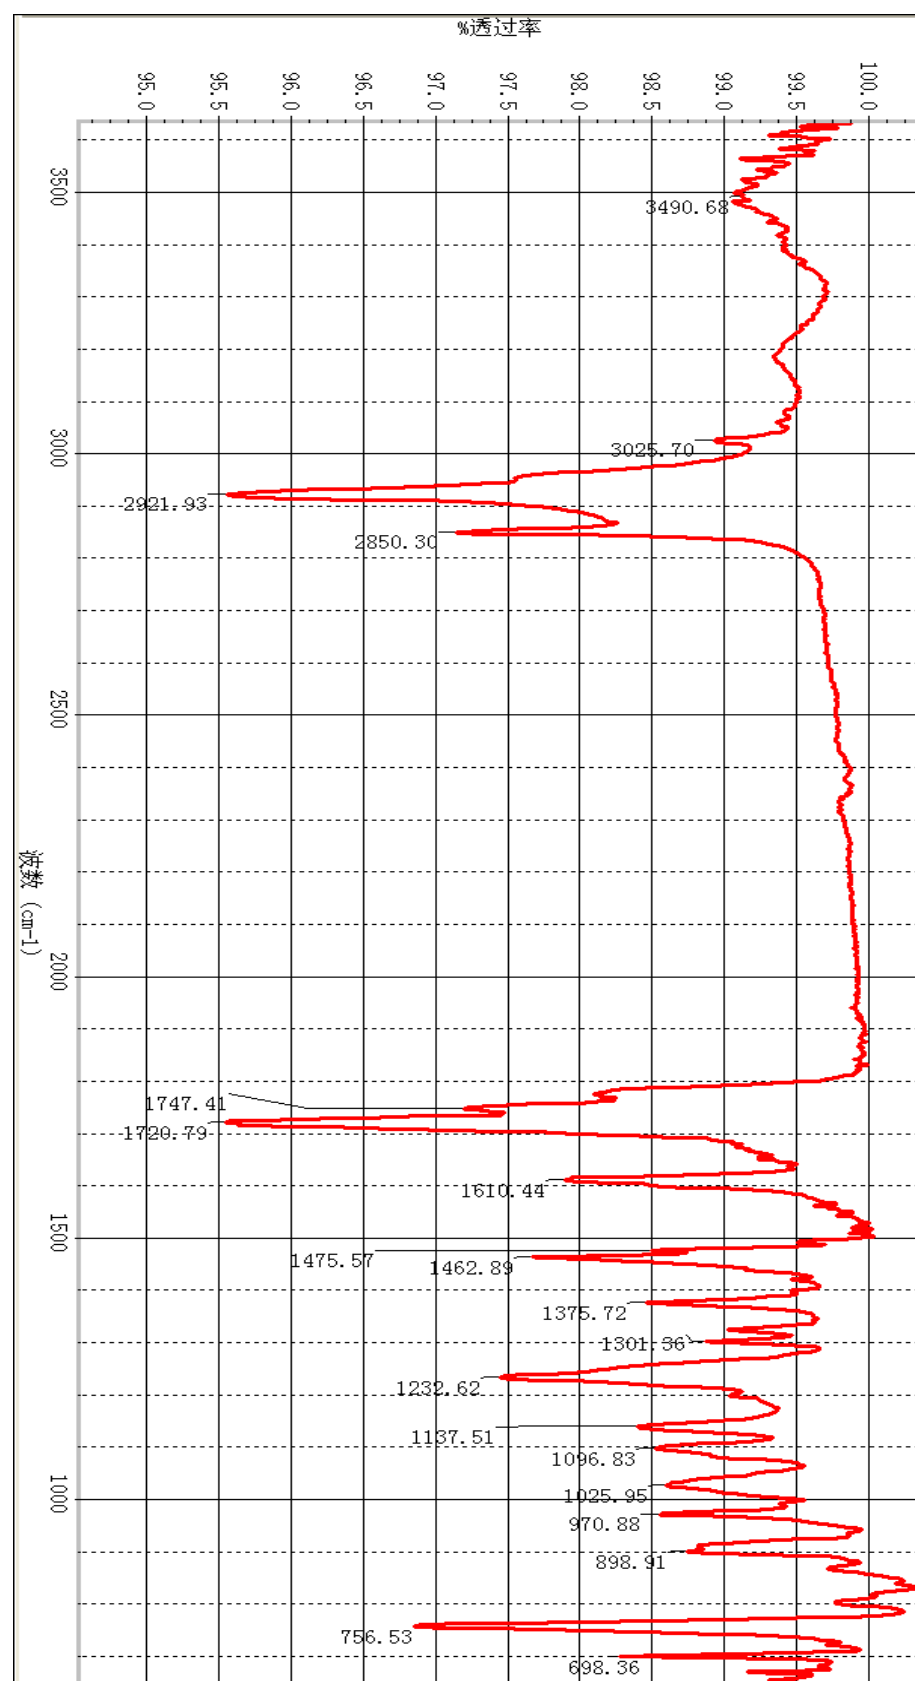

**Figure S27.**  $^1\text{H}$  NMR spectrum of phainanoid H (**3**) in  $\text{CDCl}_3$

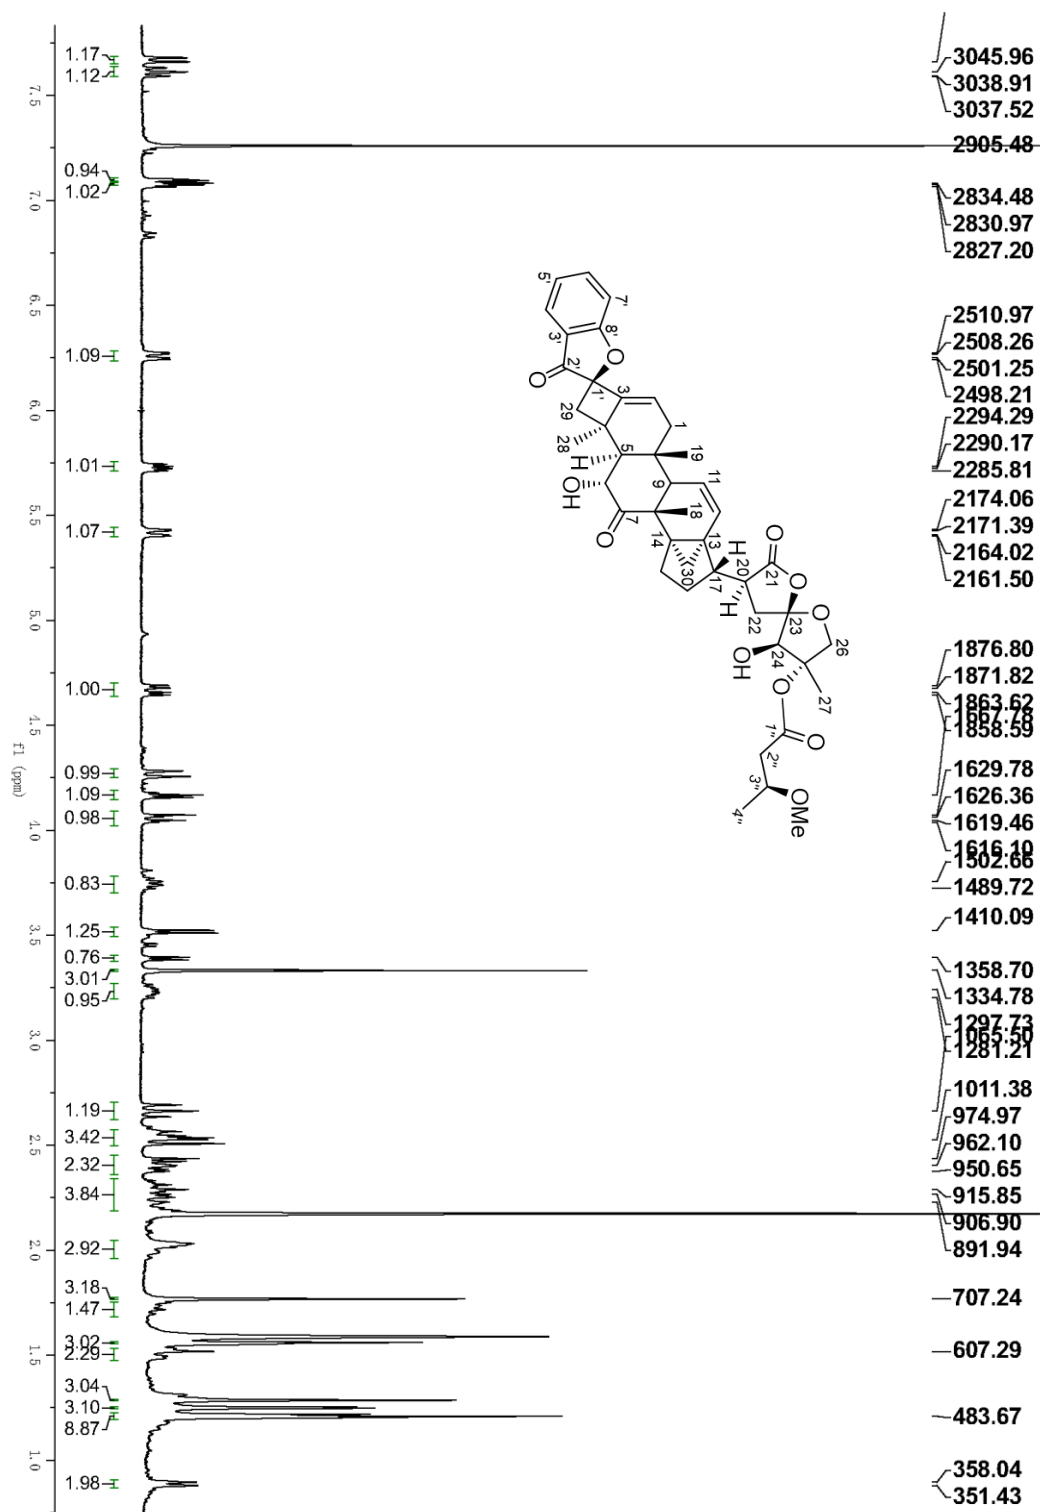

**Figure S28.**  $^{13}\text{C}$  NMR spectrum of phainanoid H (**3**) in  $\text{CDCl}_3$

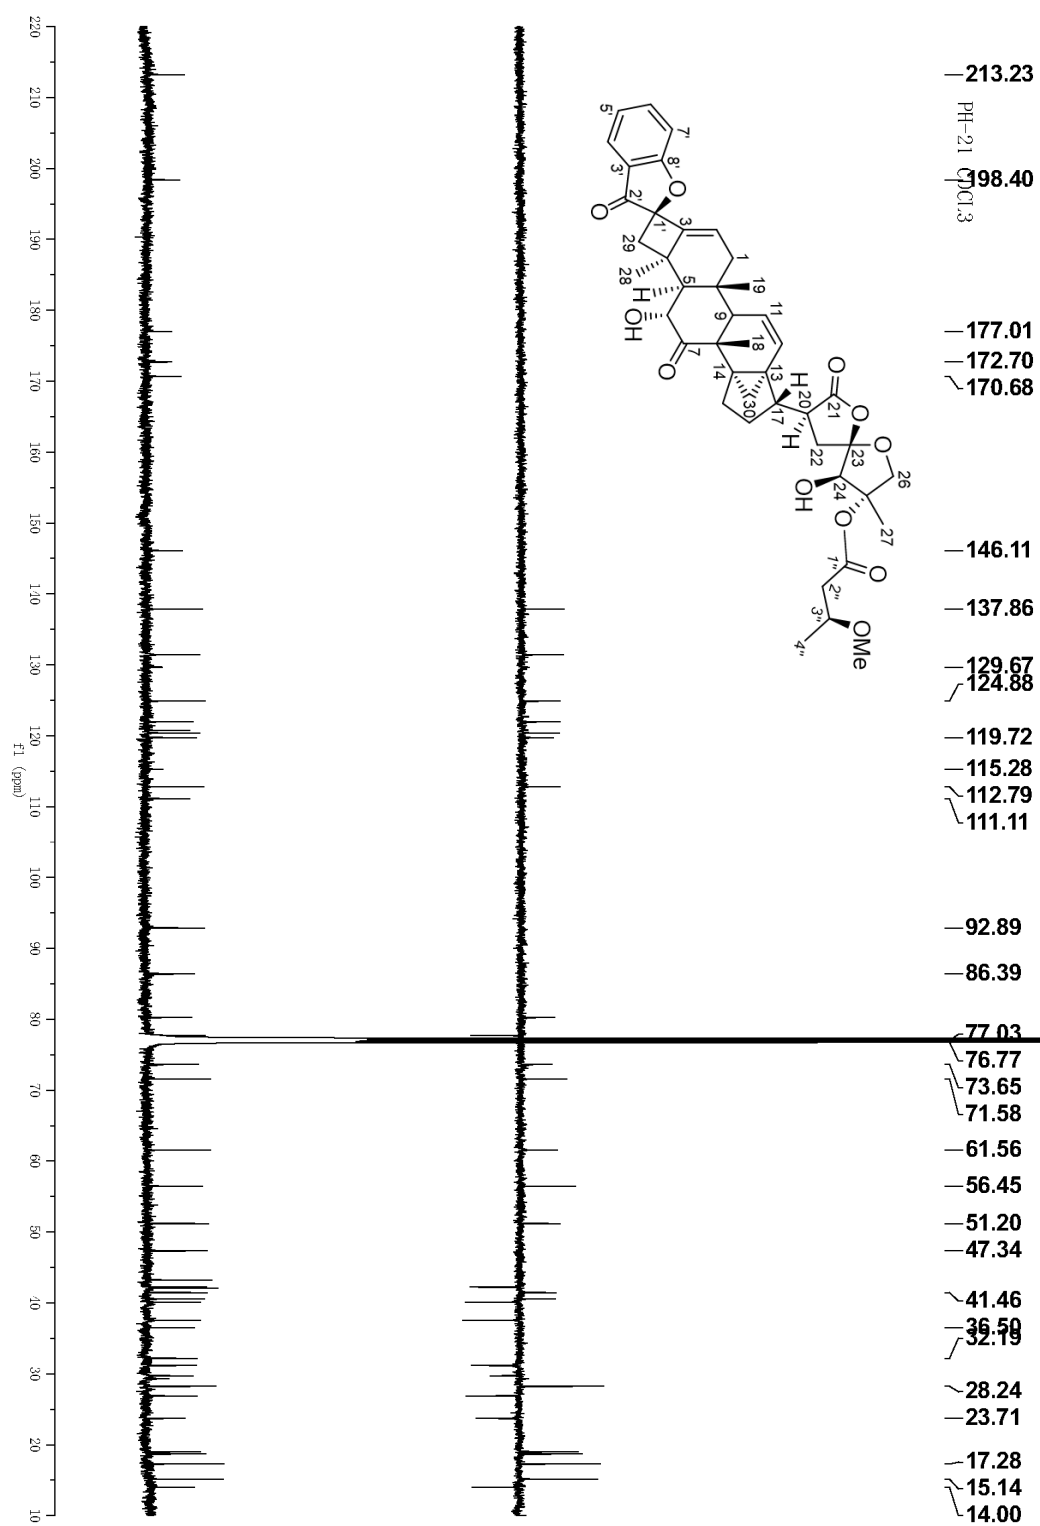

**Figure S29.** HSQC spectrum of phainanoid H (**3**) in CDCl<sub>3</sub>

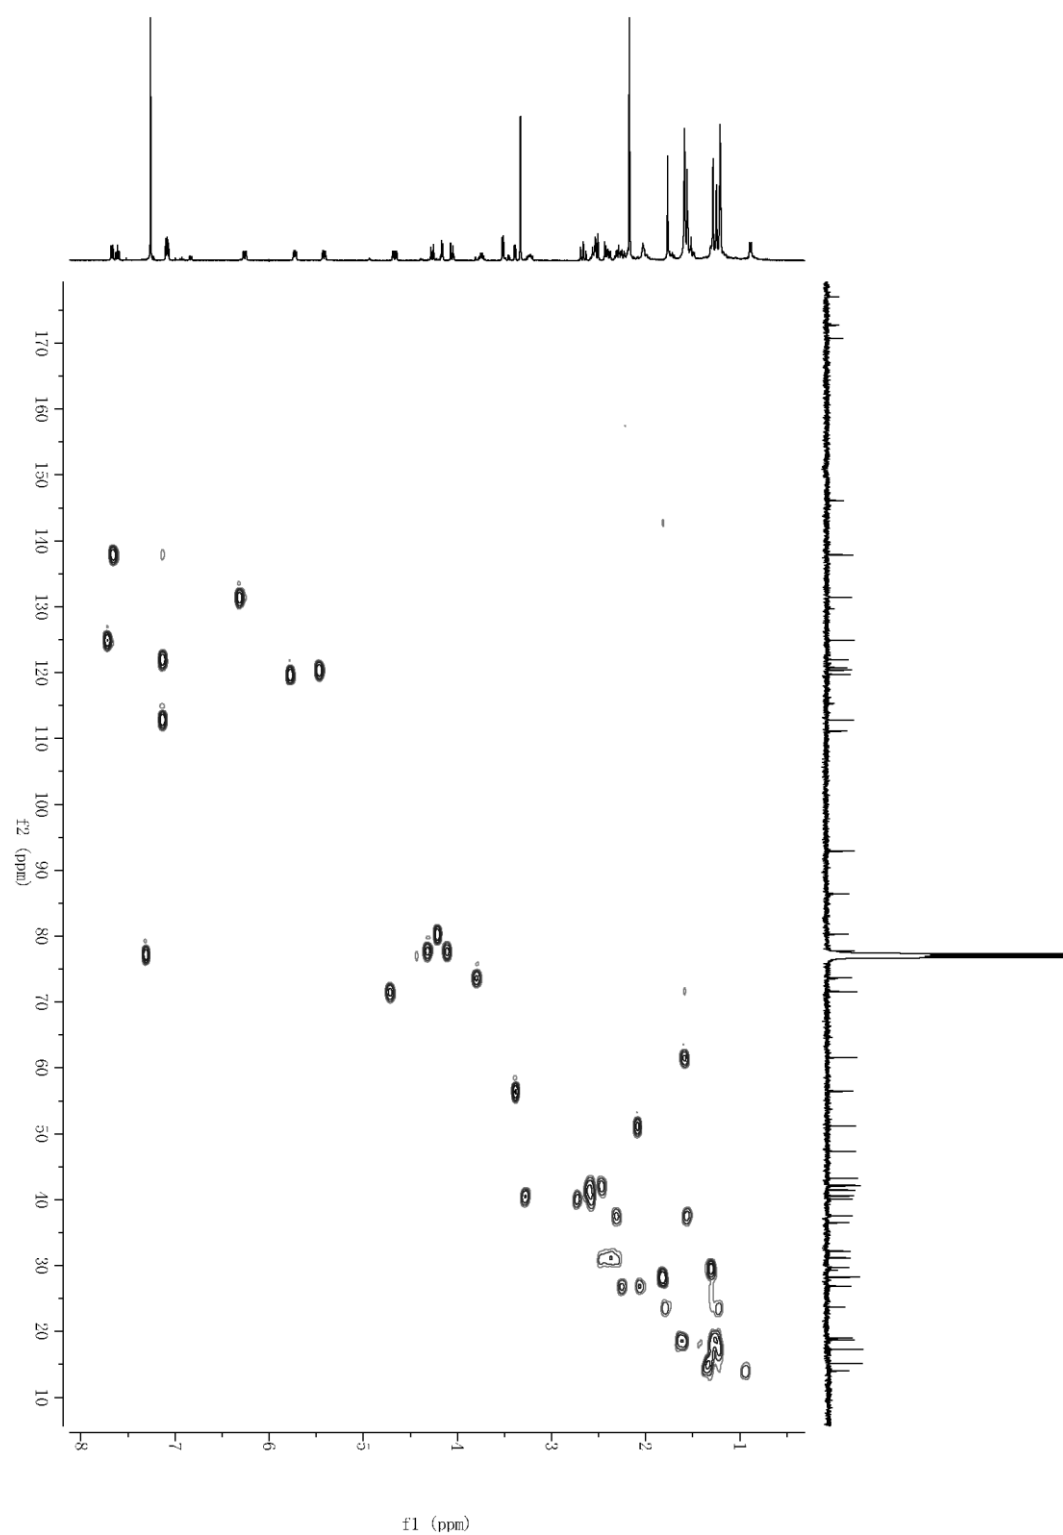

**Figure S30.** HMBC spectrum of phainanoid H (**3**) in CDCl<sub>3</sub>

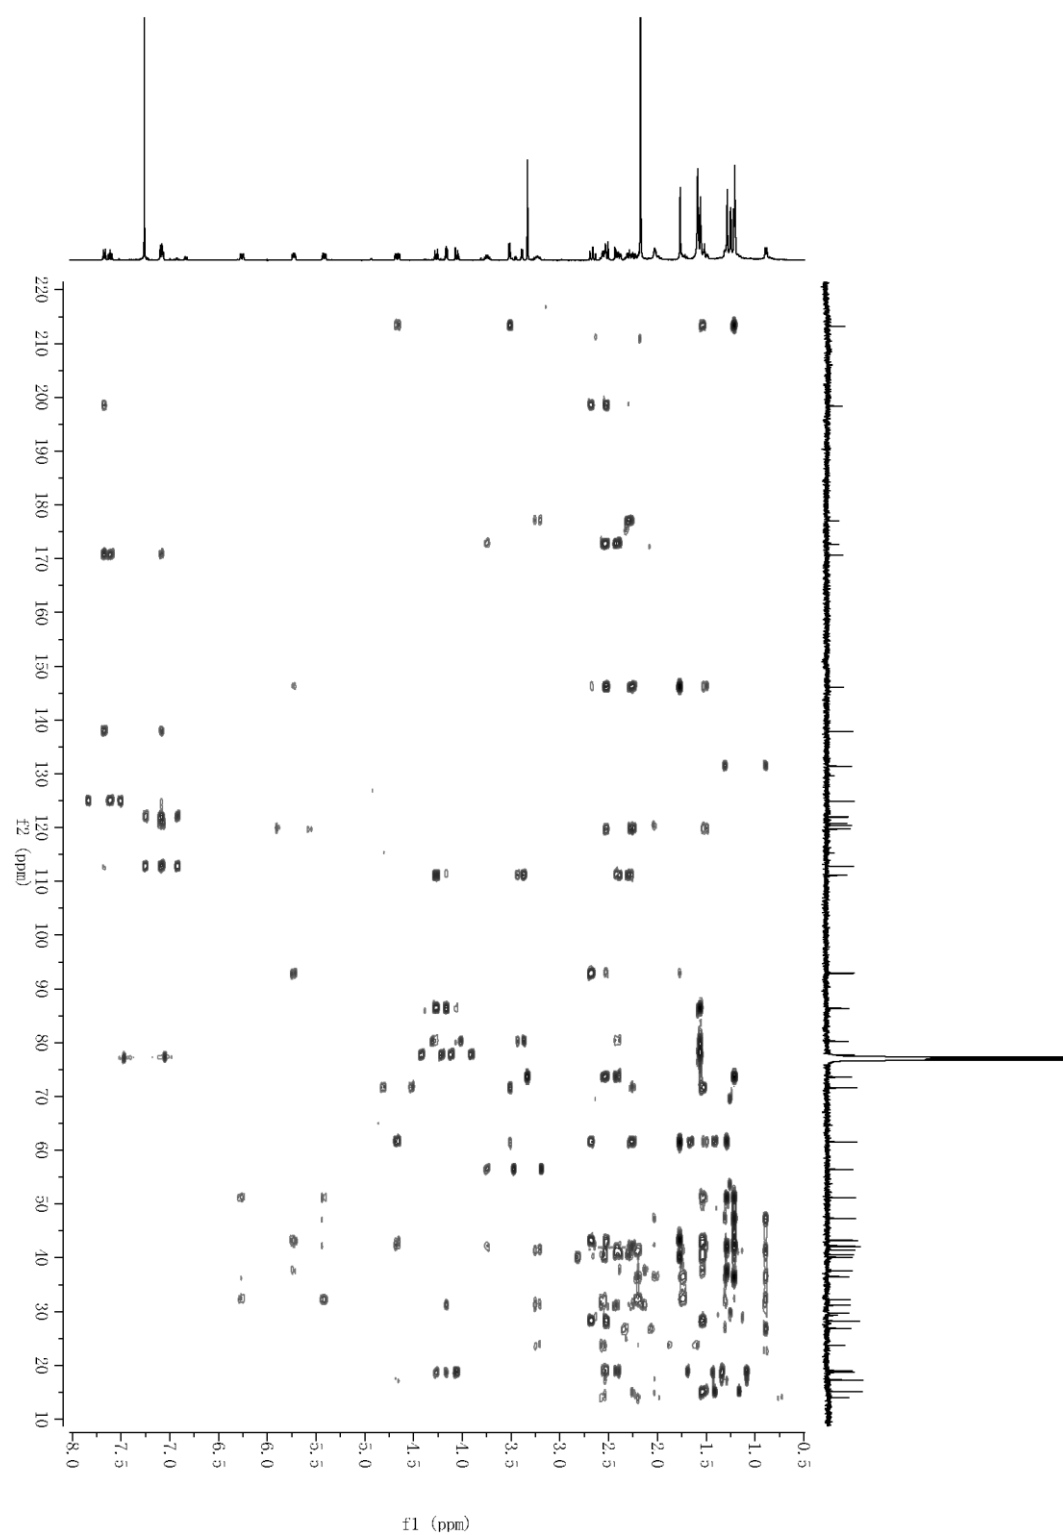



**Figure S31.**  $^1\text{H}$ - $^1\text{H}$  COSY spectrum of phainanoid H (**3**) in  $\text{CDCl}_3$

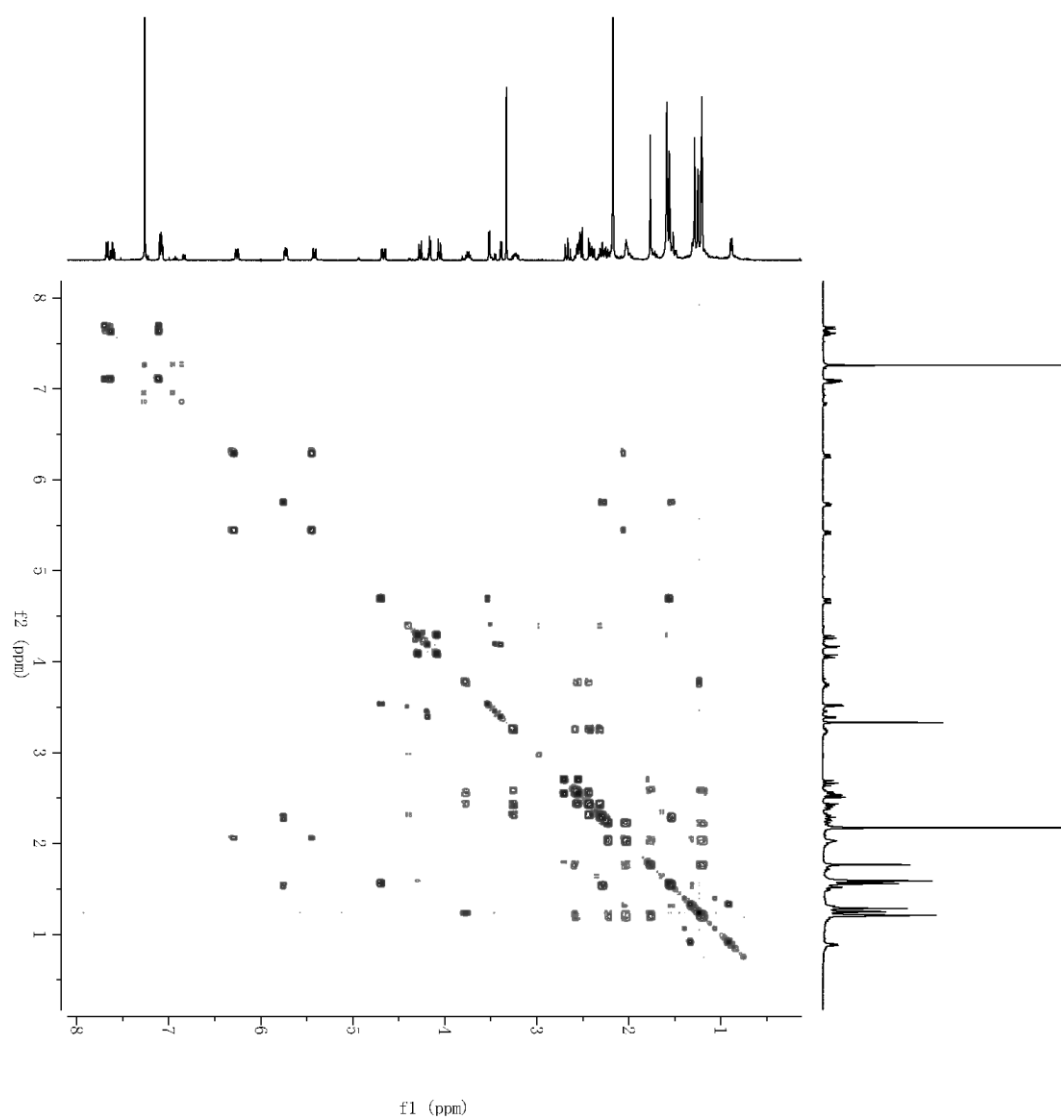

**Figure S32.** ROESY spectrum of phainanoid H (**3**) in CDCl<sub>3</sub>

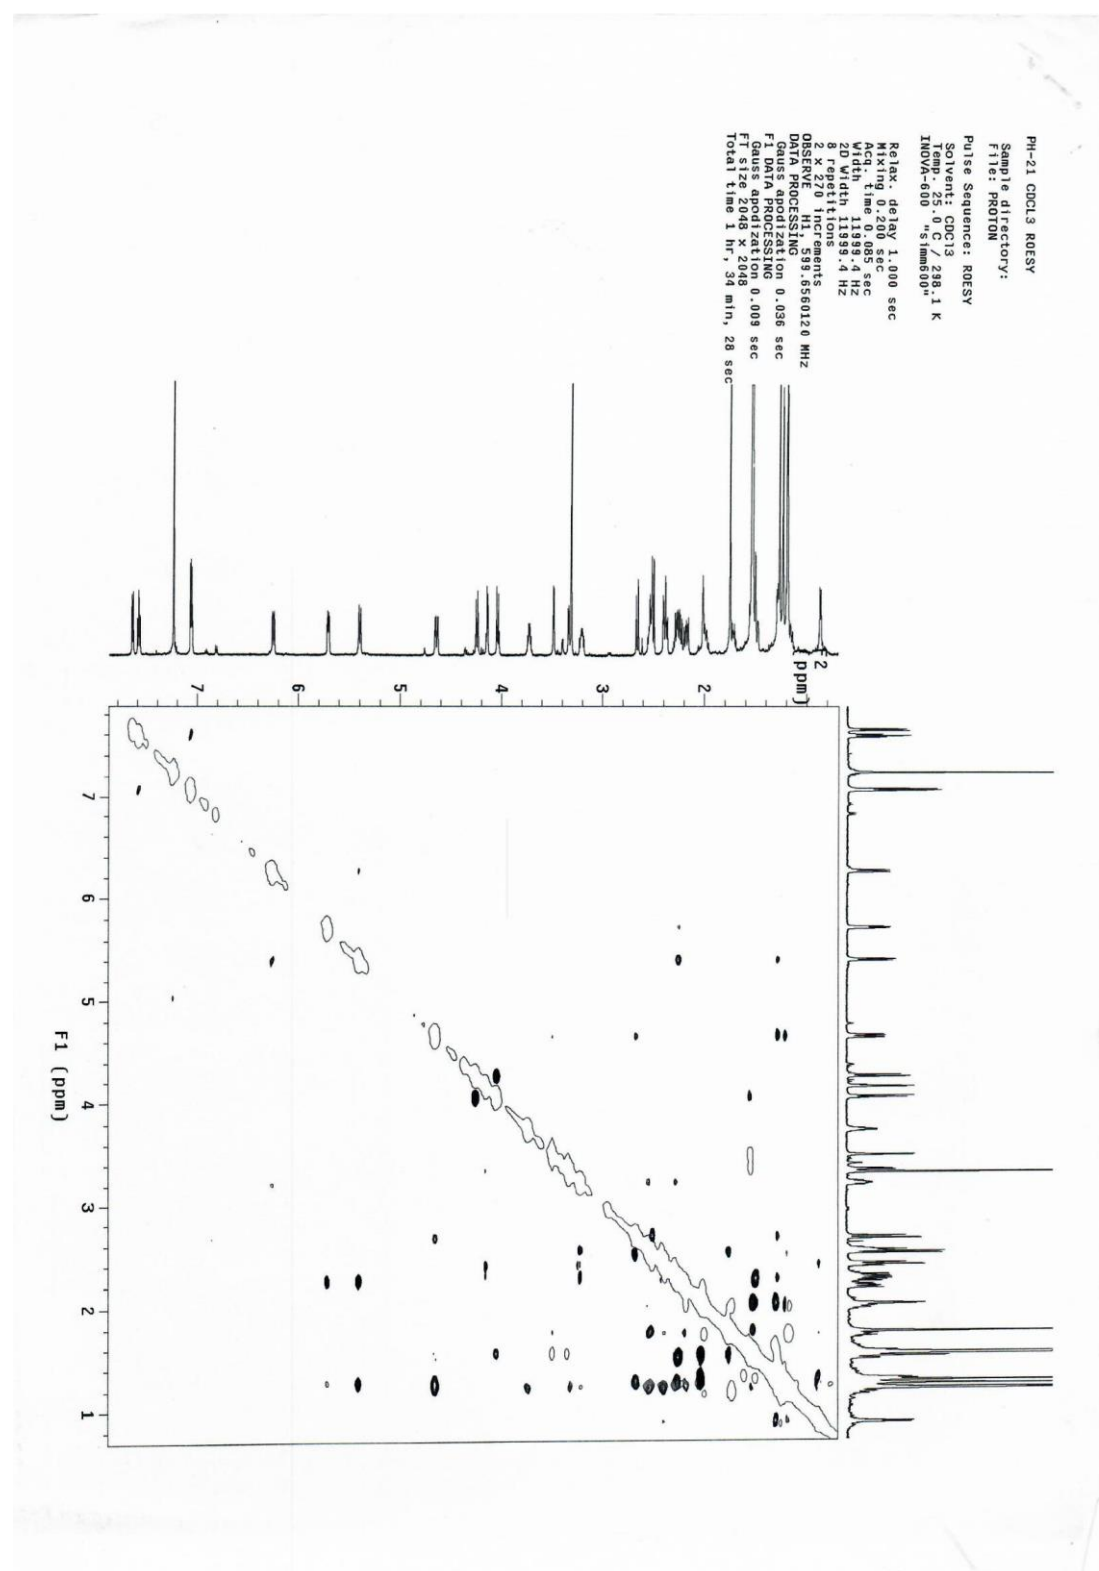

**Figure S33.** ESI(+)-MS spectrum of phainanoid H (**3**)

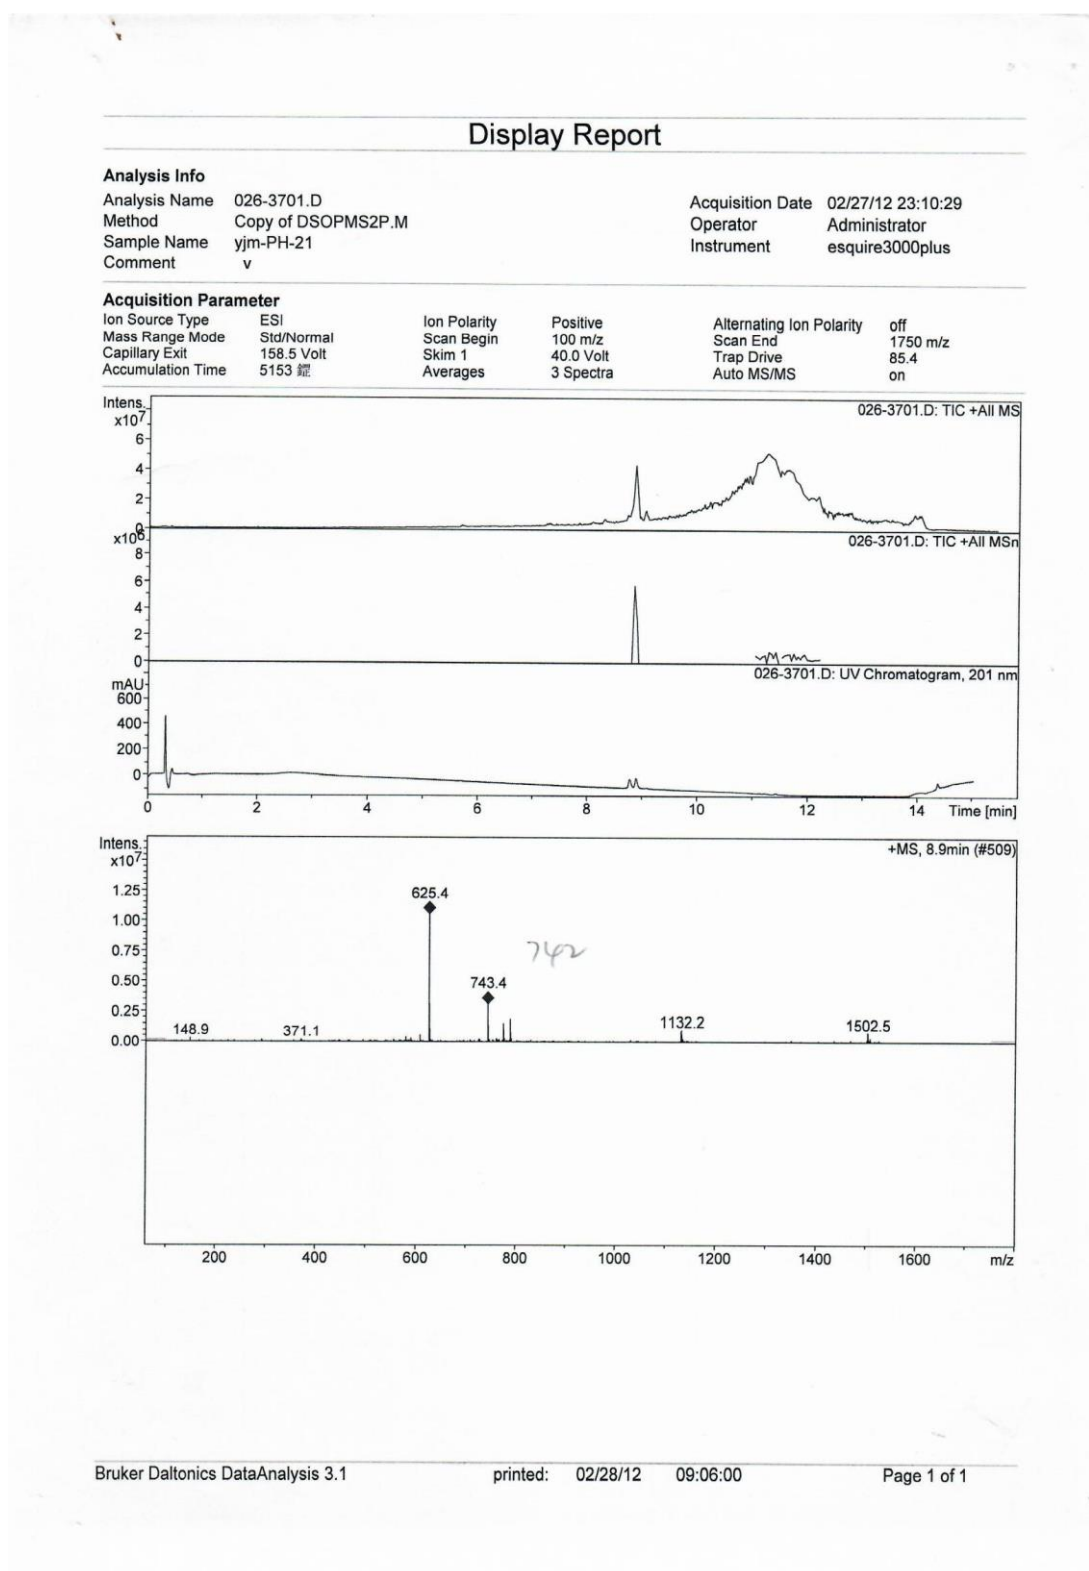

**Figure S34.** ESI(–)MS spectrum of phainanoid H (**3**)

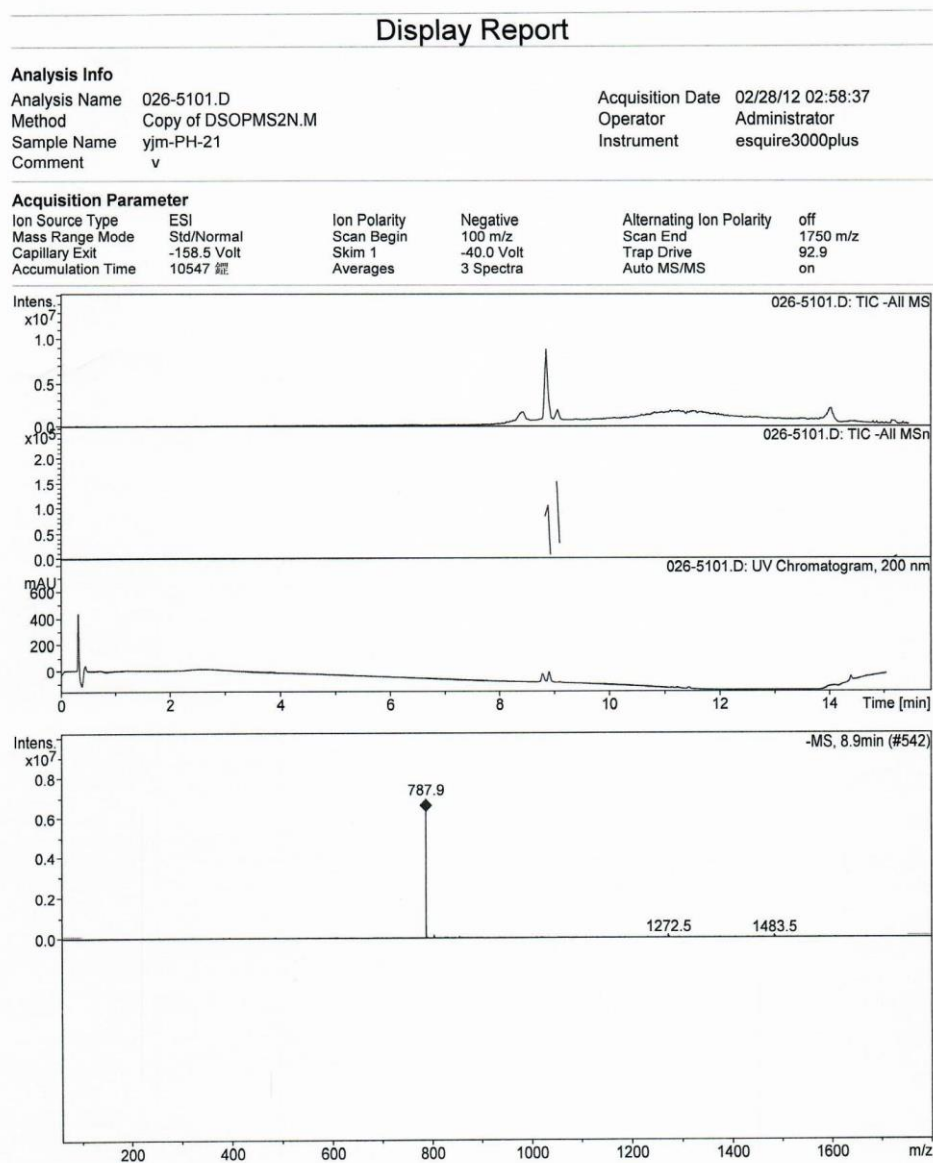

**Figure S35.** HRESI(+)MS spectrum of phainanoid H (**3**)

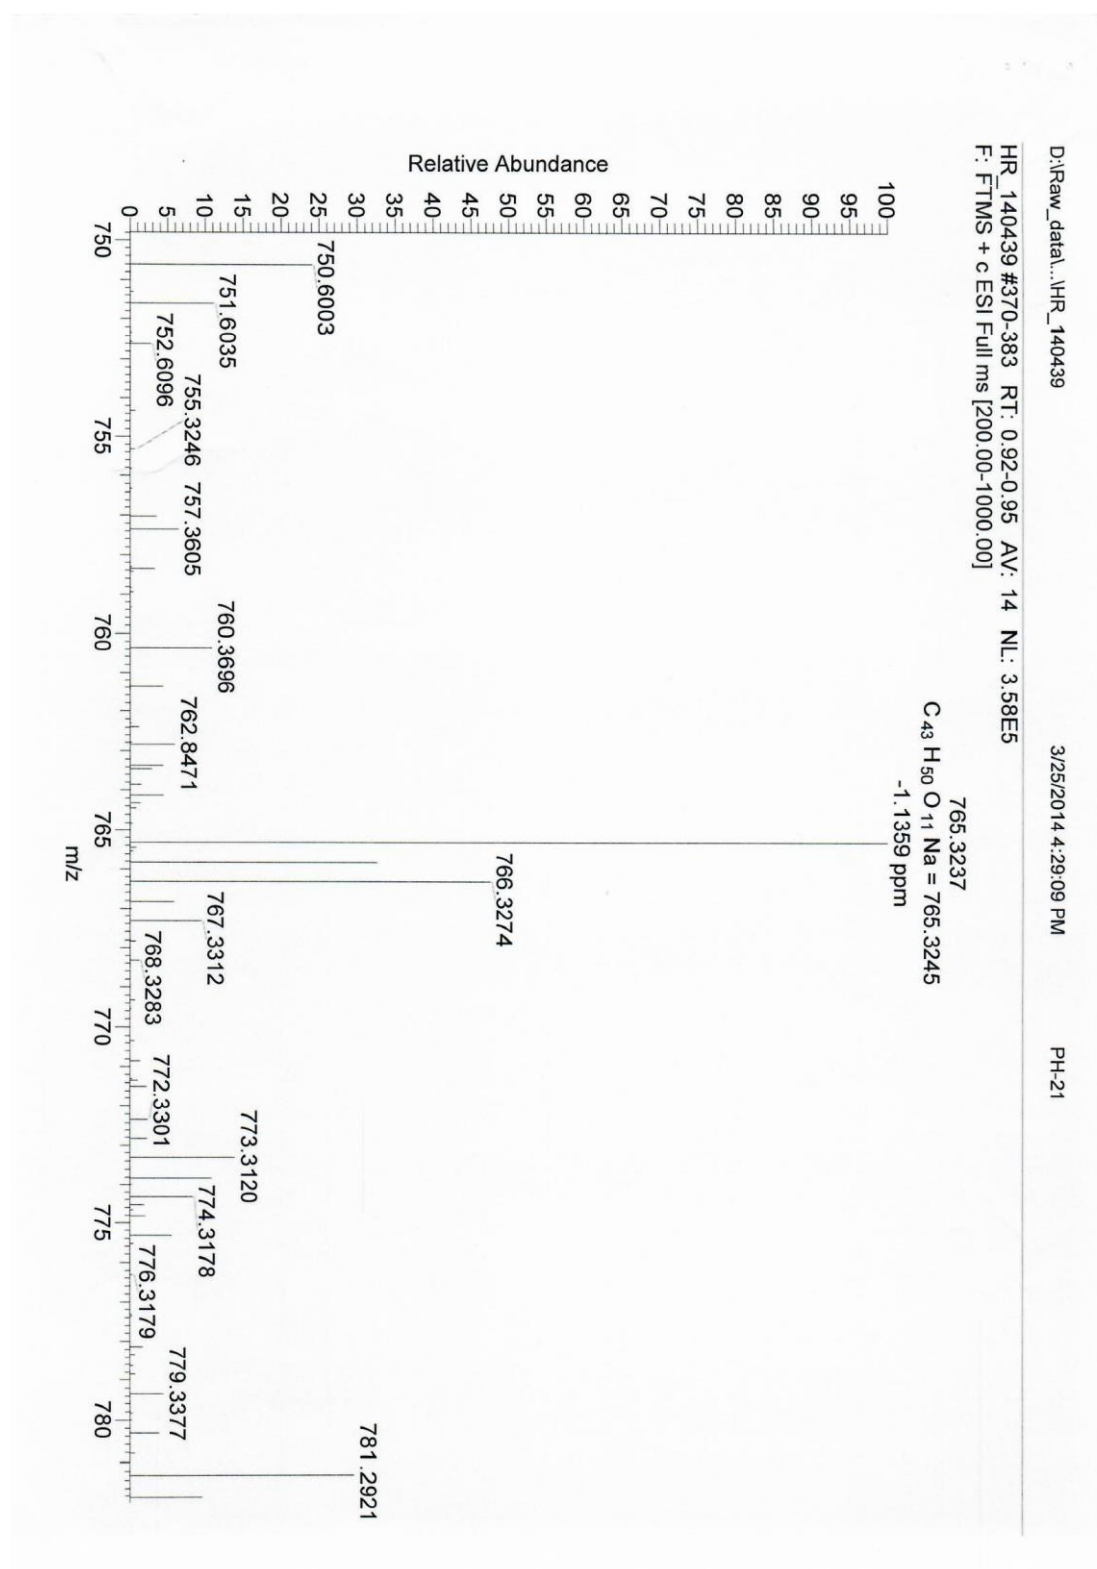

**Figure S36.** IR spectrum of phainanoid H (**3**)

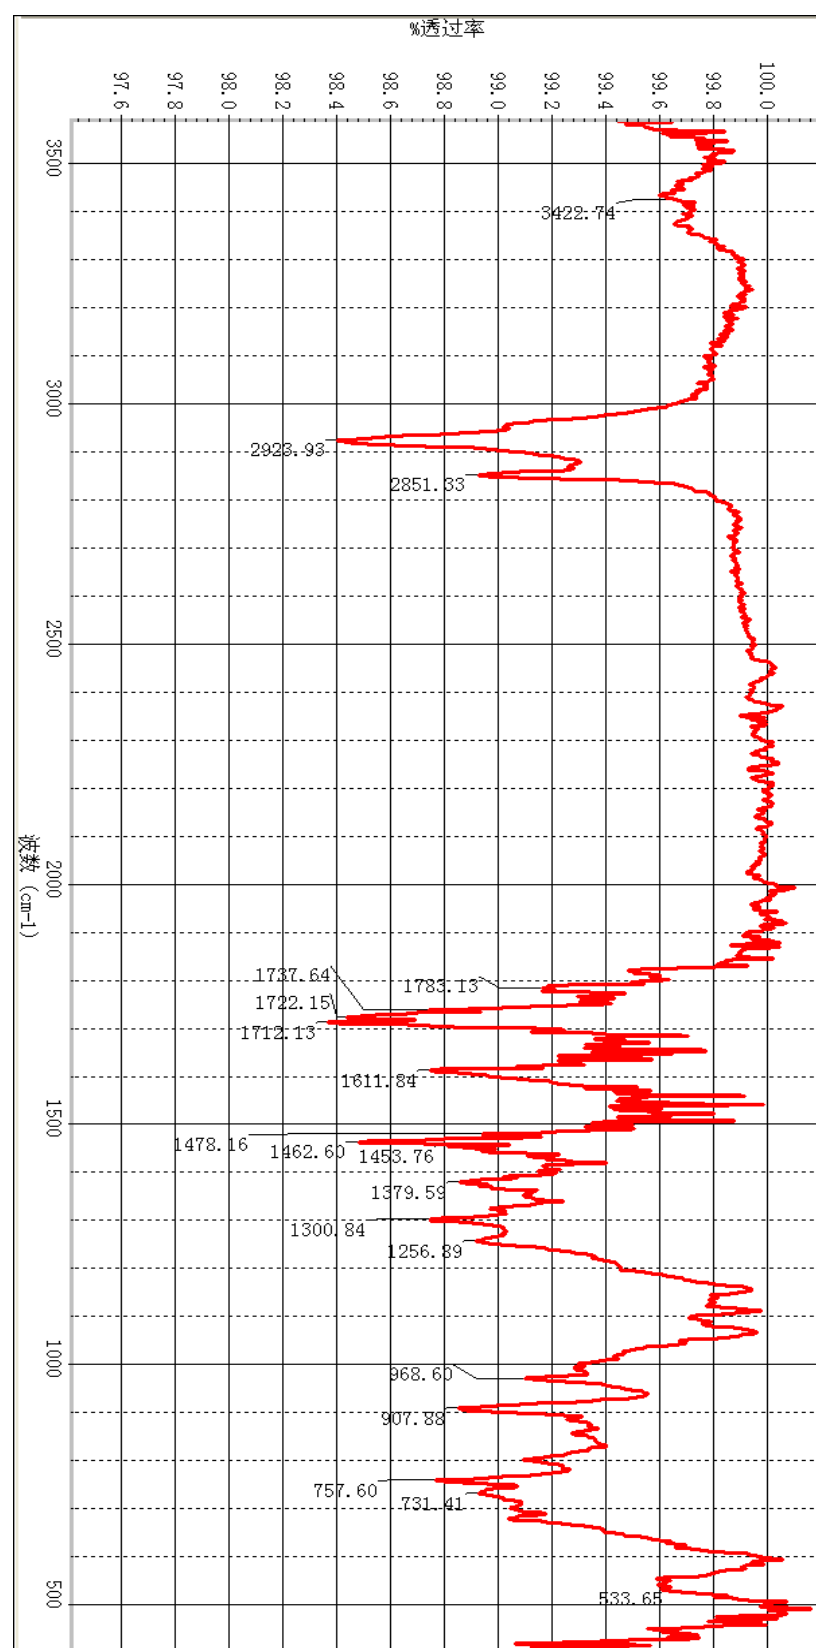

**Figure S37.**  $^1\text{H}$  NMR spectrum of phainanoid I (**4**) in  $\text{CDCl}_3$

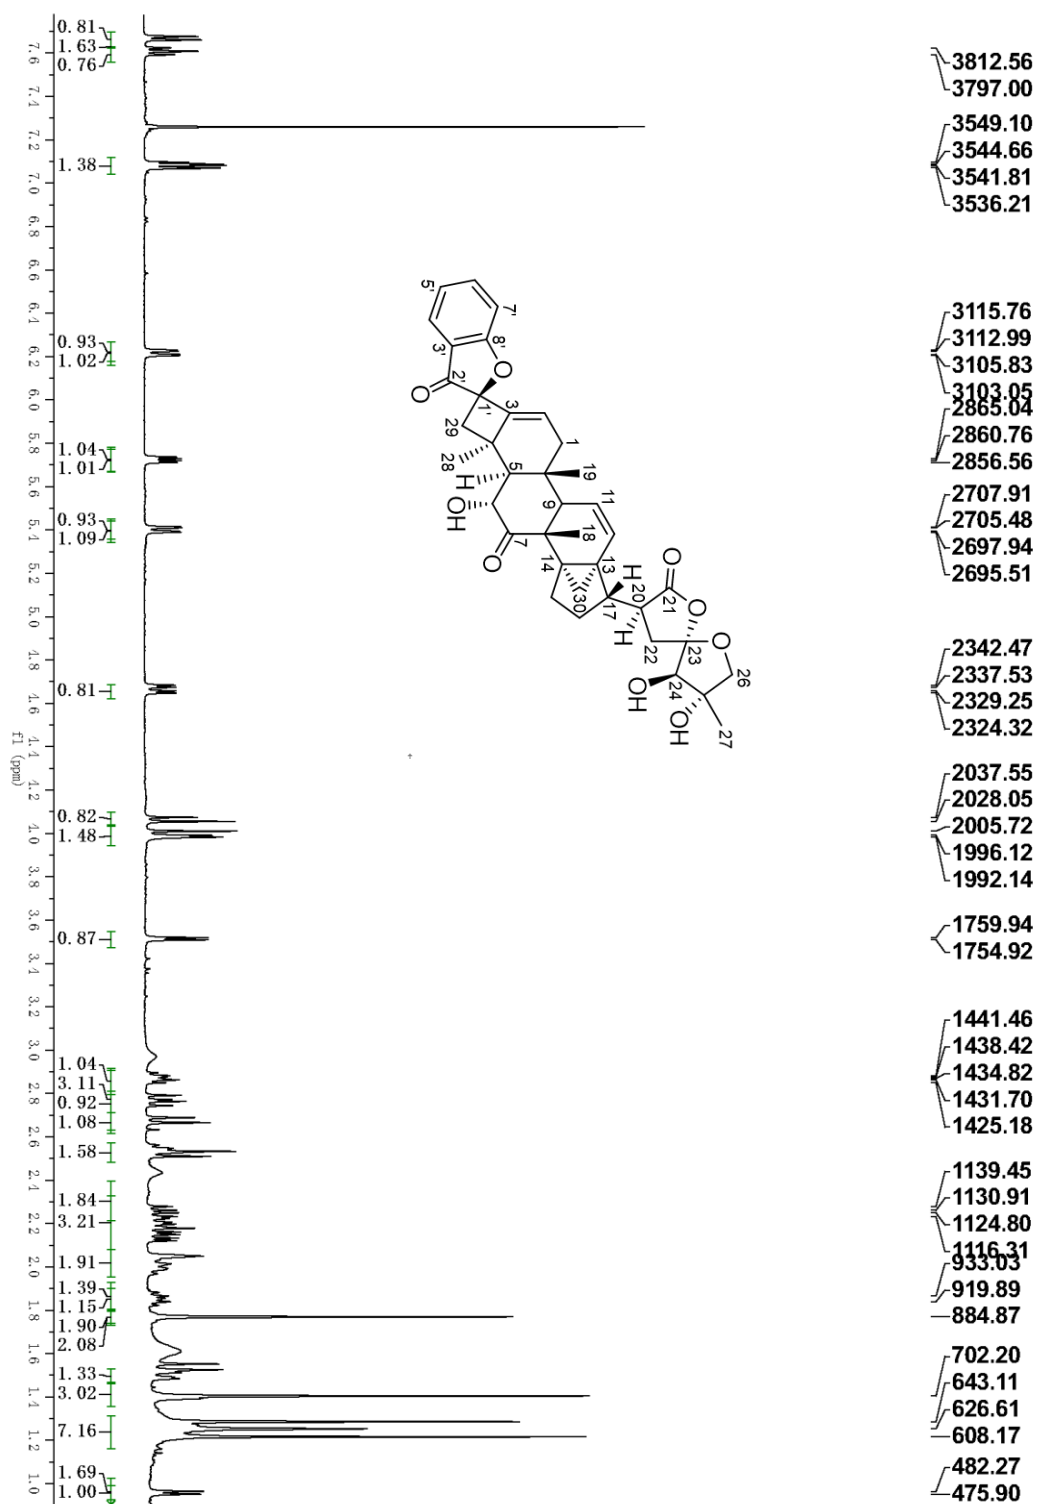

**Figure S38.**  $^{13}\text{C}$  NMR spectrum of phainanoid I (**4**) in  $\text{CDCl}_3$

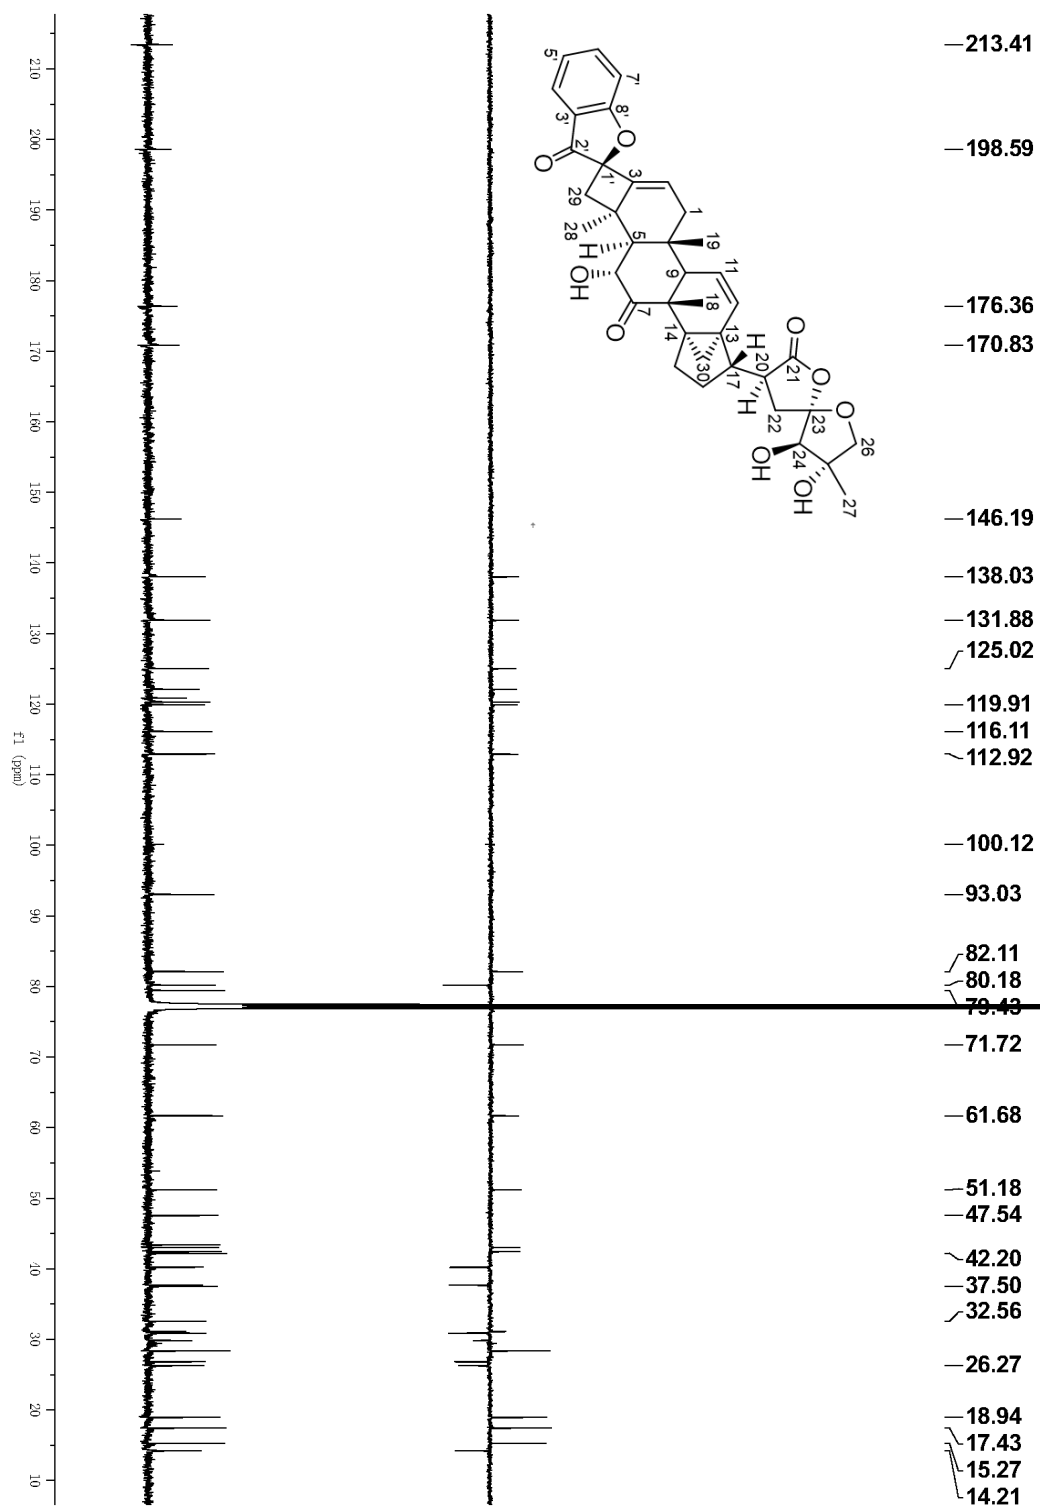



**Figure S39.** HSQC spectrum of phainanoid I (**4**) in CDCl<sub>3</sub>

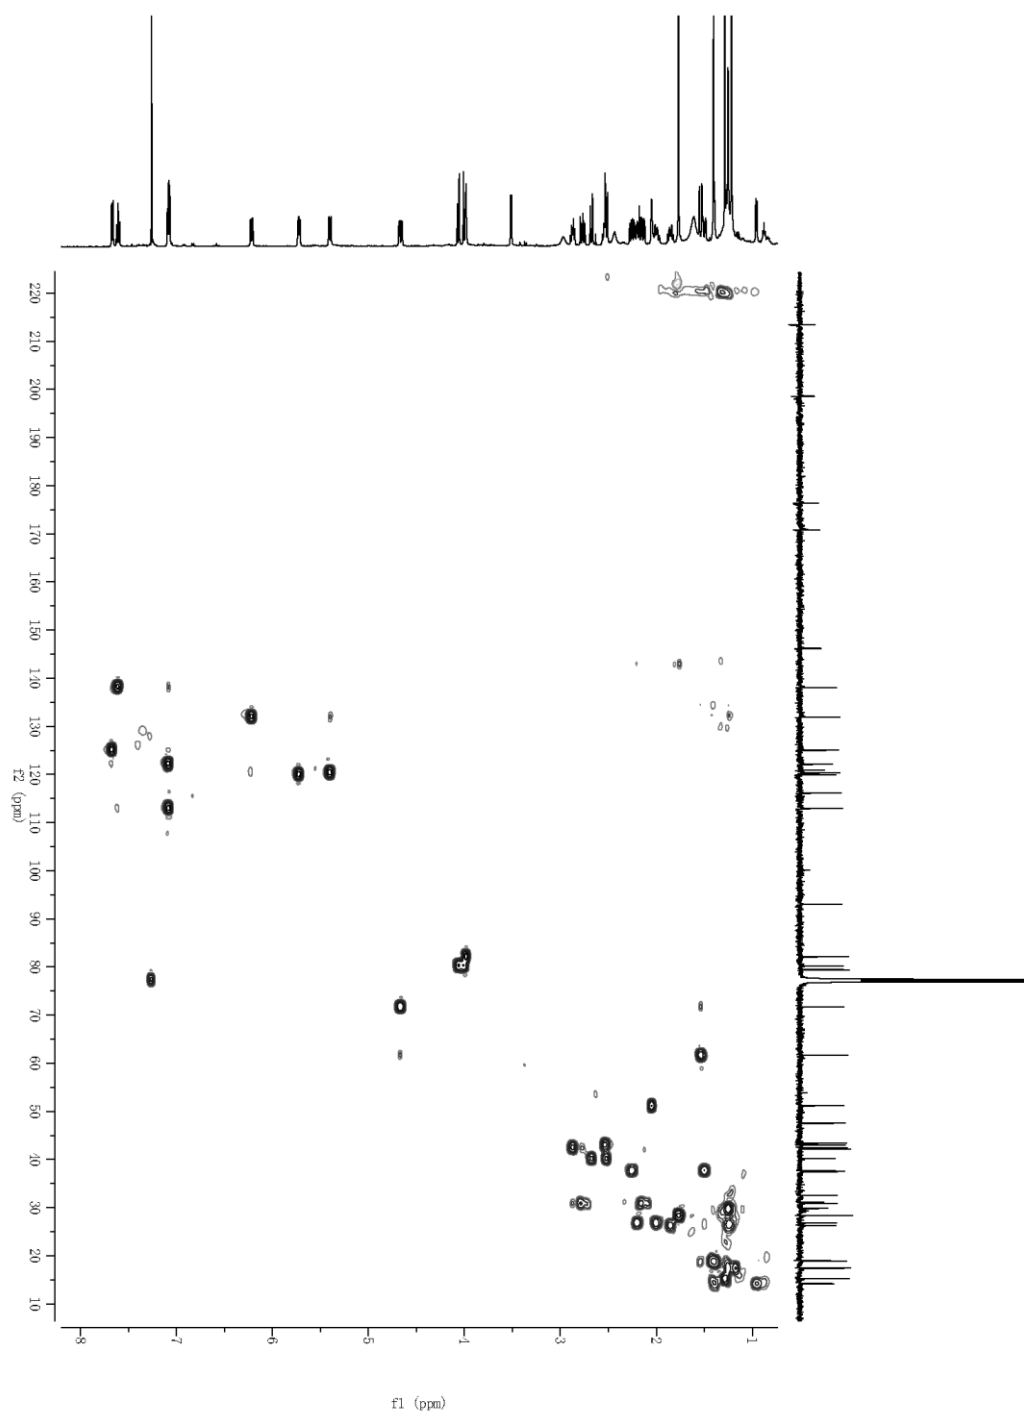

**Figure S40.** HMBC spectrum of phainanoid I (**4**) in  $\text{CDCl}_3$

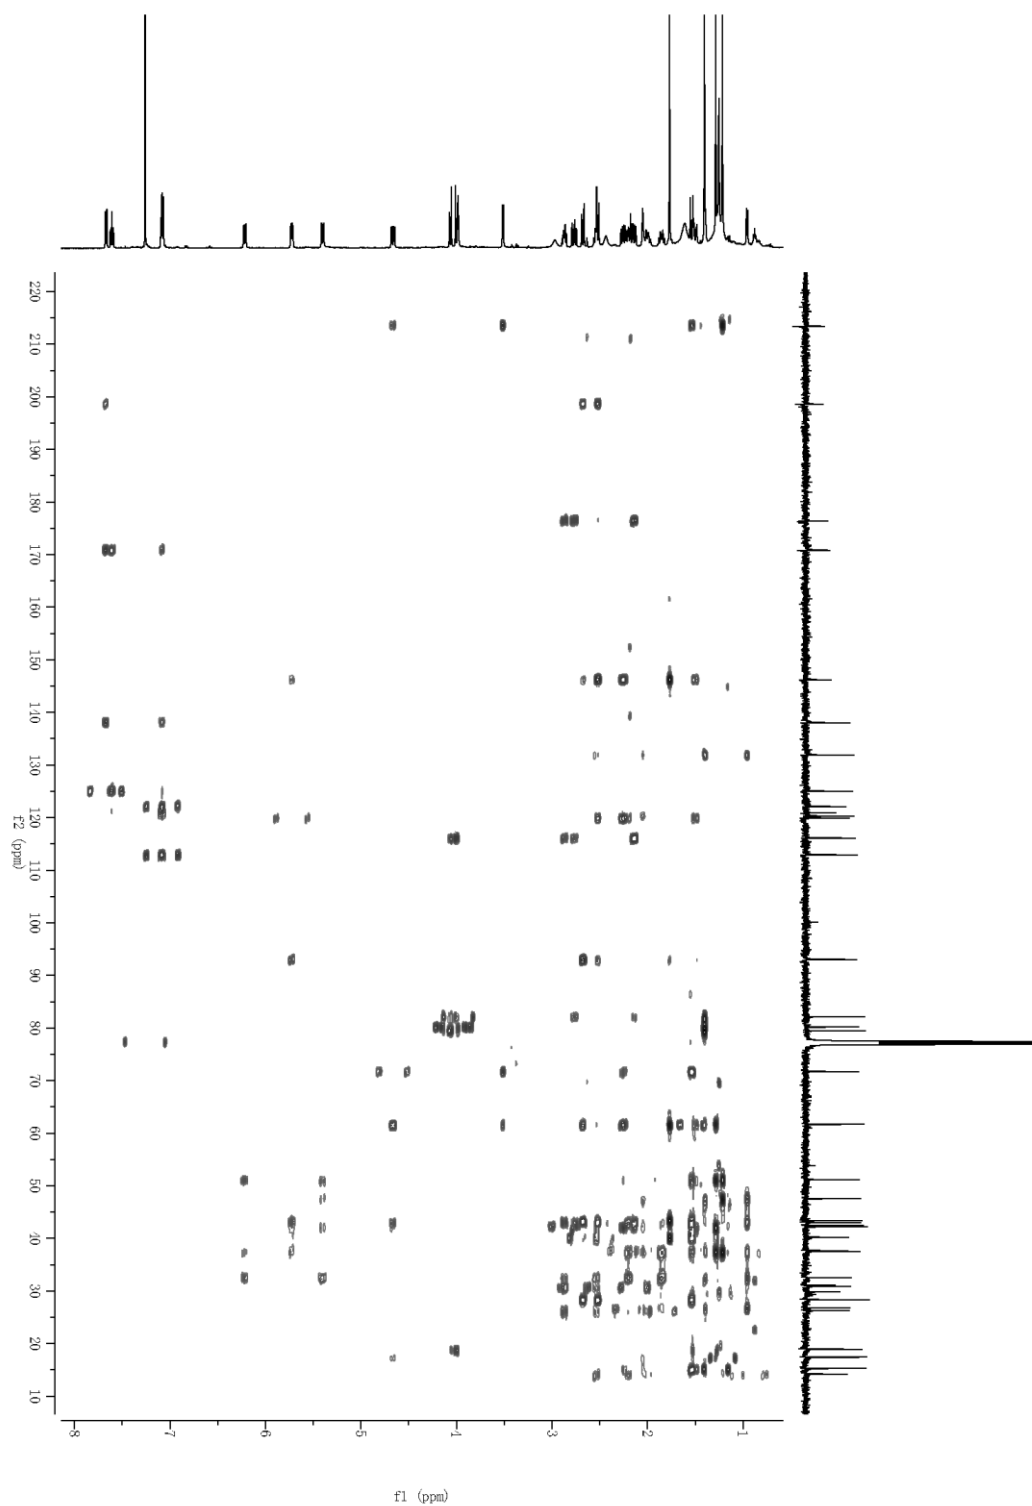

**Figure S41.**  $^1\text{H}$ - $^1\text{H}$  COSY spectrum of phainanoid I (**4**) in  $\text{CDCl}_3$

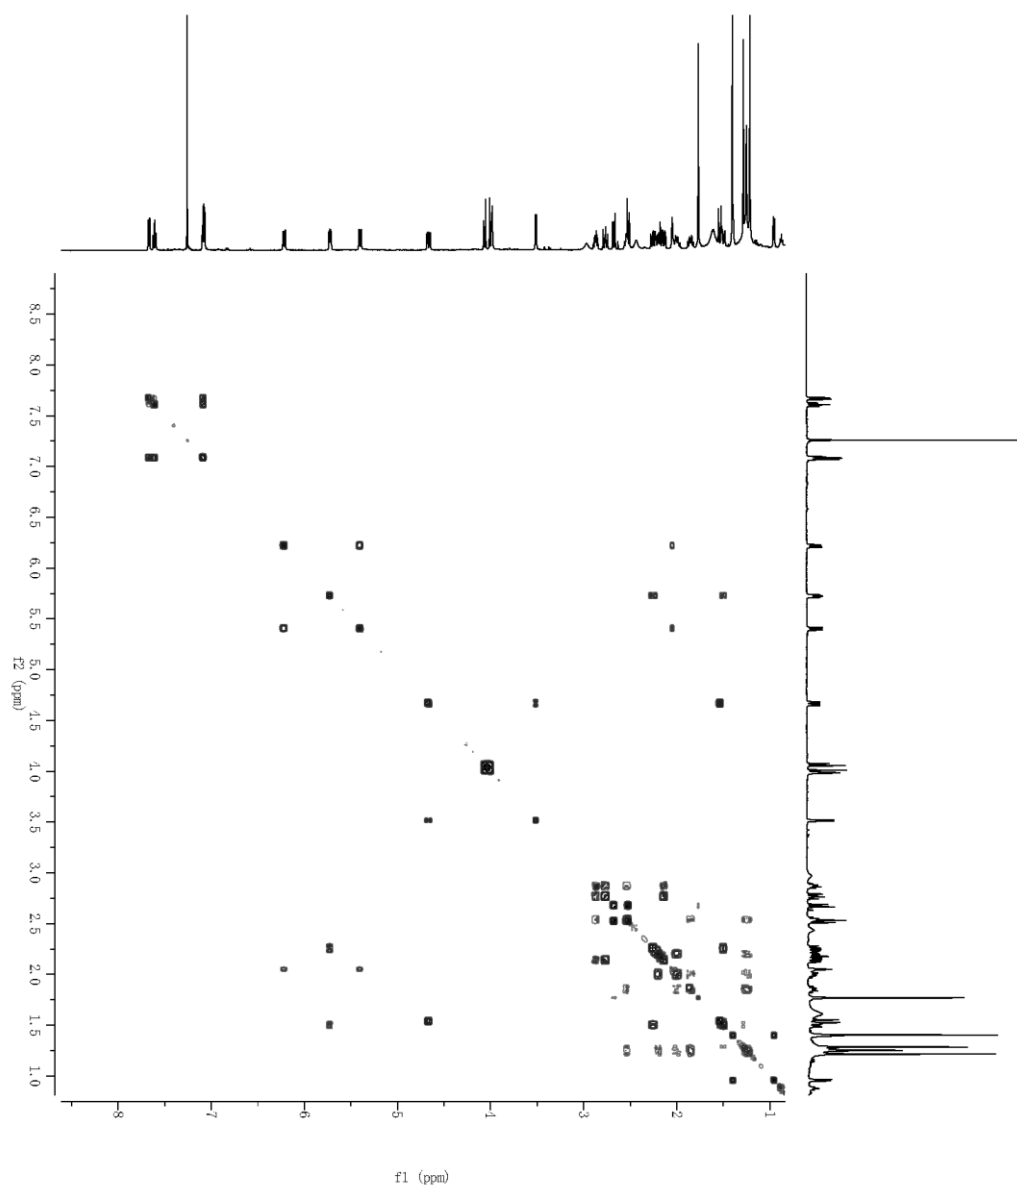

**Figure S42.** ROESY spectrum of phainanoid I (**4**) in CDCl<sub>3</sub>

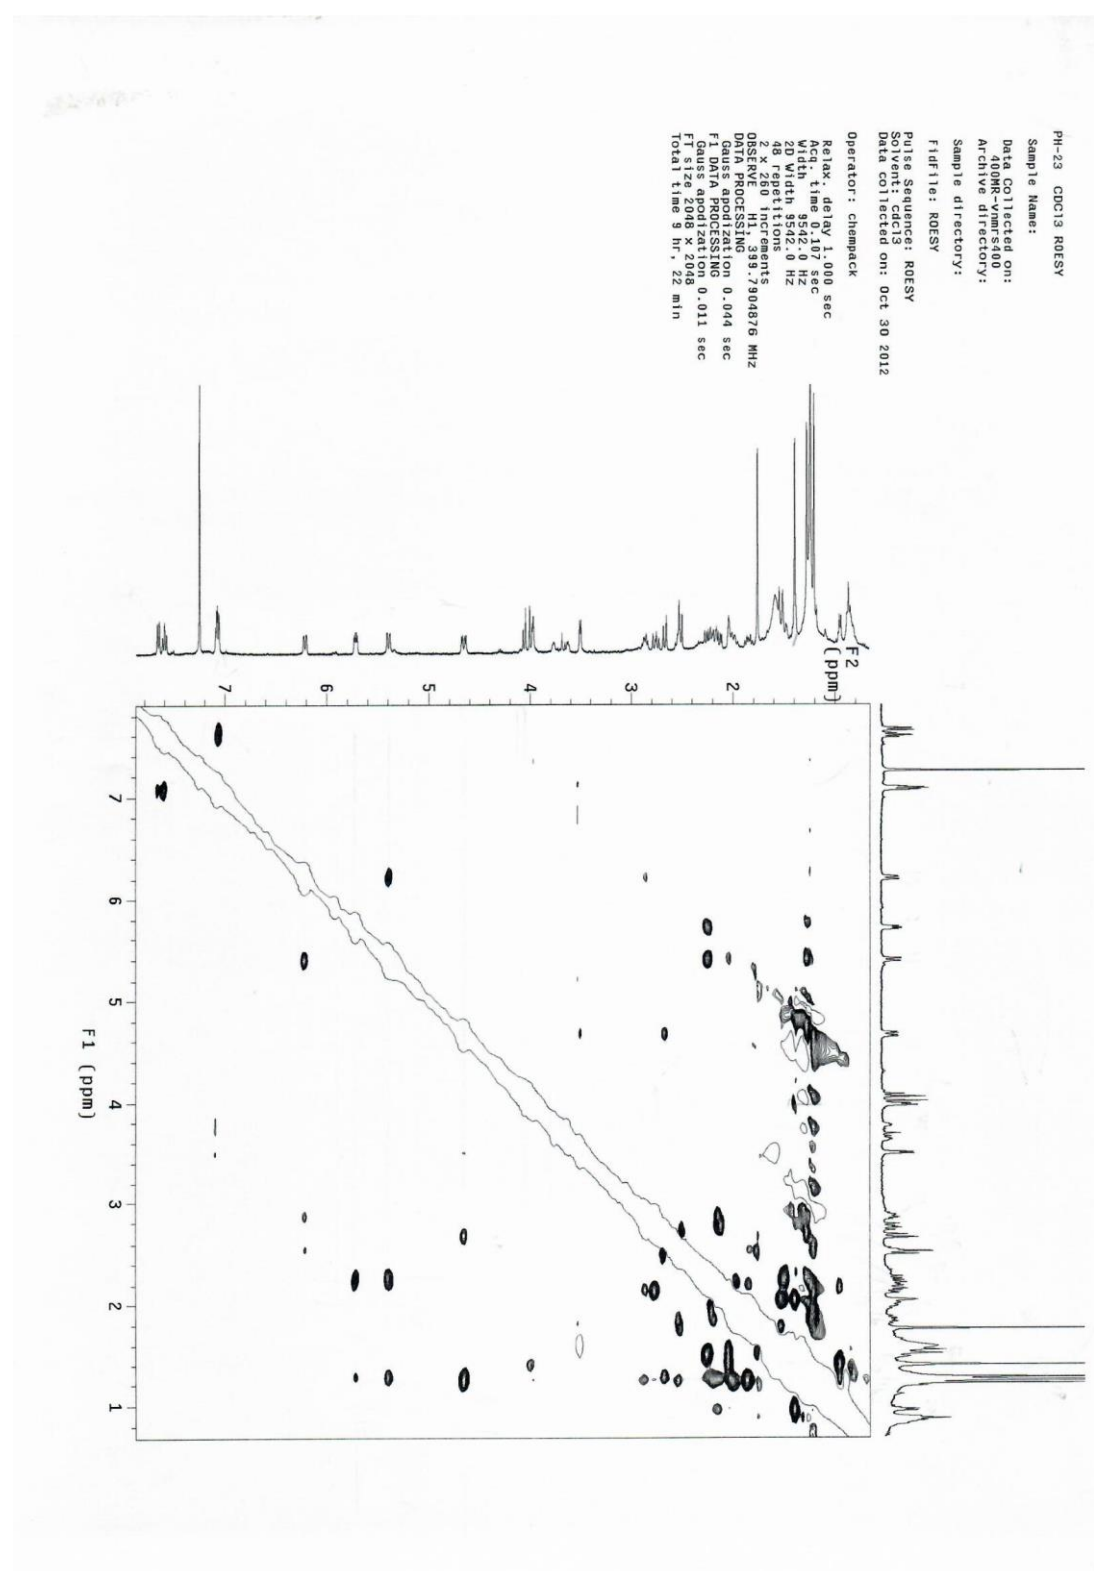

[illegible]

**Figure S44.** ESI(–)MS spectrum of phainanoid I (4)

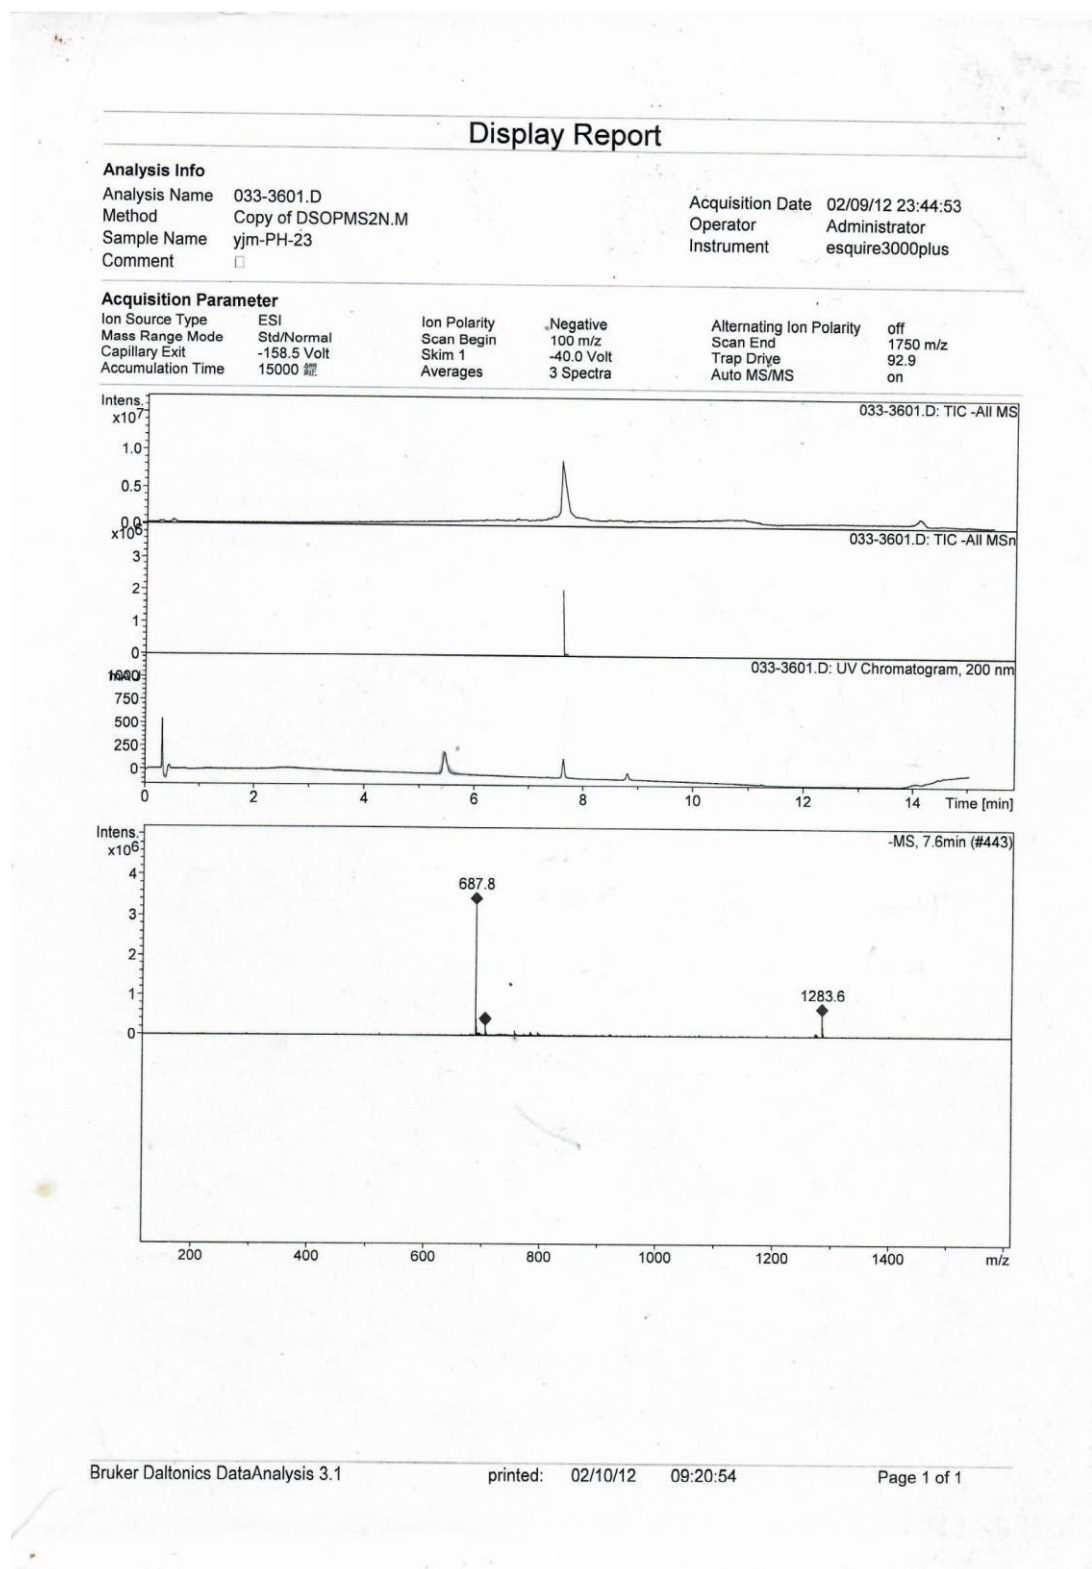

**Figure S45.** HRESI(–)MS spectrum of phainanoid I (4)

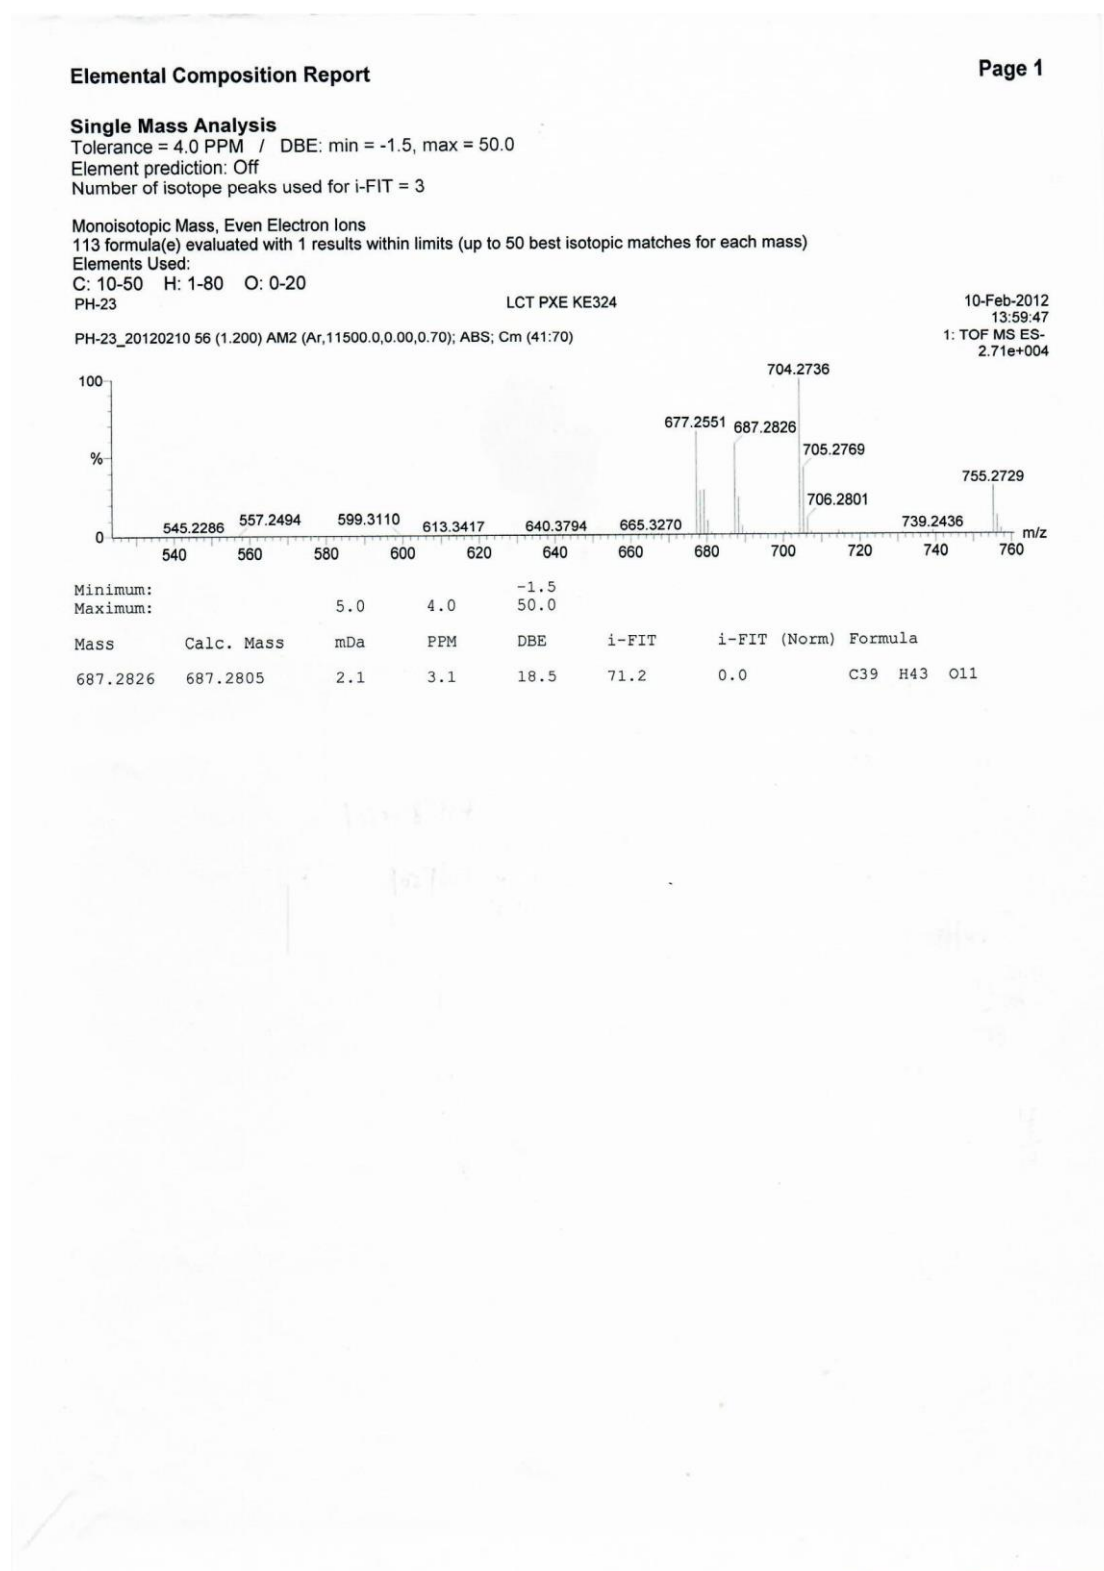

**Figure S46.** IR spectrum of phainanoid I (**4**)

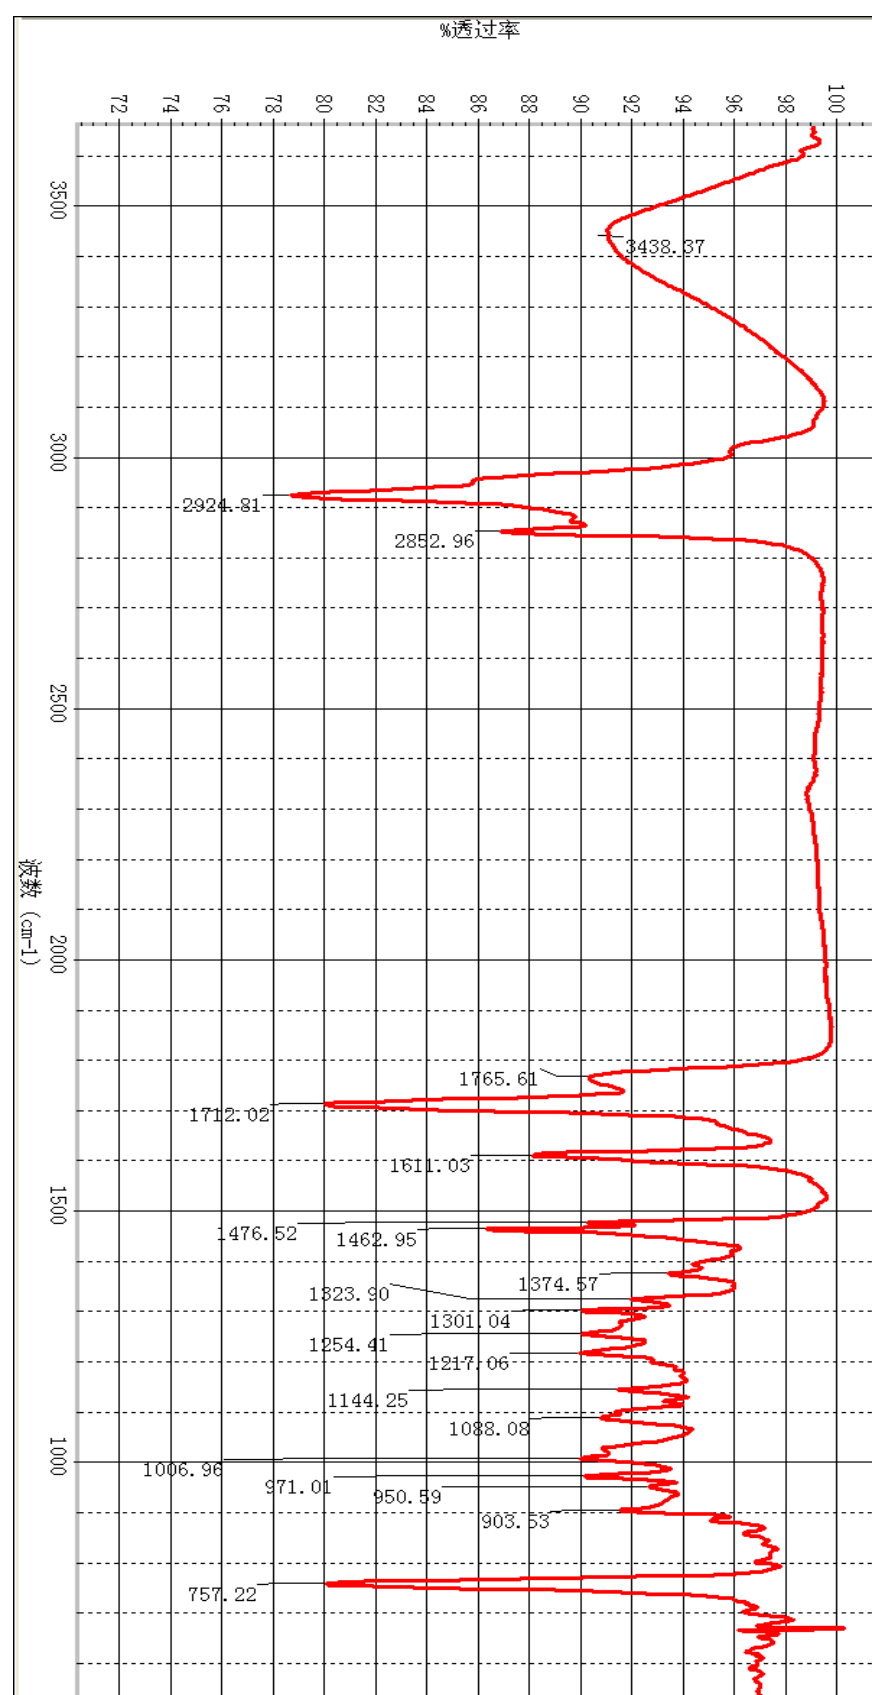

Supplement: Supplementary file 1 [file 9161224]
